# Supplementary material
Source: PubMed Central journal article supplement (PMC7388686)

**SIEMENS**

**Dimension Vista<sup>®</sup> System**

**Flex<sup>®</sup> reagent cartridge**

---

PN 782423.001 2017-10-17 E

REF K6423A

**PBNP**

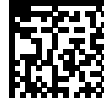

## Dimension Vista® System

Dimension Vista® 500, Dimension Vista® 1000T, Dimension Vista® 1500, Dimension Vista® 3000T Systems

### Flex® reagent cartridge

### PBNP

See shaded sections: Updated information from 2017-04 version.

Issue Date 2017-10-17

#### N-terminal Pro-Brain Natriuretic Peptide

**Intended Use:** The PBNP method is an *in vitro* diagnostic assay for the quantitative measurement of N-terminal pro-brain natriuretic peptide (NT-proBNP) in human serum and plasma on the Dimension Vista® System. In individuals suspected of having congestive heart failure (CHF), measurements of NT-proBNP are used as an aid in the diagnosis and assessment of severity. The test is further indicated for the risk stratification of patients with acute coronary syndrome and heart failure.

**Summary:** Left ventricular dysfunction can occur as part of coronary heart disease, arterial hypertension, valvular disease, and primary myocardial disease. If the left ventricular dysfunction remains untreated and is progressive, the potential for mortality is high, e.g., due to sudden cardiac death.

Chronic cardiac insufficiency is a clinical syndrome caused by impairment of the cardiac pumping function. Based on the symptoms, the severity of cardiac insufficiency is classified in stages I-IV by the New York Heart Association (NYHA). Clinical tests and imaging procedures are used to diagnose left ventricular dysfunction.<sup>1</sup>

The significance of natriuretic peptides in the control of cardiovascular system function has been established. Initial studies reveal that natriuretic peptides can be used for diagnosing clinical problems associated with left ventricular dysfunction.<sup>2</sup> The following natriuretic peptides have been reported in the literature: atrial natriuretic peptide (ANP), brain natriuretic peptide (BNP), and C-type natriuretic peptide (CNP).<sup>3,4</sup>

ANP and BNP have natriuretic and diuretic properties. As antagonists of the renin-angiotensin-aldosterone system, they influence the electrolyte and fluid balance in an organism.<sup>5,6</sup> In subjects with left ventricular dysfunction, serum and plasma concentrations of BNP increase, as do the concentrations of the biologically inactive prohormone, proBNP. ProBNP consists of 108 amino acids. It is secreted mainly by the left ventricle of the heart and, in this process, is cleaved into physiologically active BNP (77 – 108), and the N-terminal fragment NT-proBNP (1 – 76).<sup>4</sup>

Studies indicate that NT-proBNP can be used in diagnostic and prognostic applications.<sup>7 – 13</sup> The concentration of NT-proBNP in plasma indicates the prognosis for the left ventricular dysfunction. It is also useful in assigning symptoms to cardiac or non-cardiac causes.

Determination of NT-proBNP helps to identify subjects with left ventricular dysfunction. Changes in NT-proBNP concentration can be used to evaluate the success of treatment in patients with left ventricular dysfunction. There are indications that NT-proBNP, due to its functions, is suitable for use in assessing vascular remodeling, and therefore contributes to the establishment of individualized rehabilitation procedures.<sup>10,11</sup>

Fisher et al. found that congestive heart failure patients with elevated NT-proBNP values had a one year mortality rate of 53% compared to 11% in patients with lower values.<sup>12</sup> In the Gusto IV study which involved more than 6800 patients it was shown that NT-proBNP was the strongest independent predictor of one year mortality in patients with acute coronary syndrome.<sup>13</sup>

The European Society of Cardiology Task Force for the Diagnosis and Treatment of Chronic Heart Failure recommends in their guidelines that natriuretic peptides including NT-proBNP "may be most useful clinically as a rule out test due to consistent and very high negative predictive values."

NT-proBNP levels are increased in patients with unstable angina and following myocardial infarction.<sup>14,15</sup> Although not diagnostic for these conditions, several studies indicate NT-proBNP measurements provide prognostic information for the short- and long-term risk stratification of patients with unstable angina or myocardial infarction.<sup>15,16,17</sup>

**Principles of Procedure:** The PBNP method is a one-step sandwich chemiluminescent immunoassay based on LOCI® technology. LOCI® reagents include two synthetic bead reagents and a biotinylated monoclonal antibody fragment which recognize an epitope located in the N-terminal part of proBNP. The first bead reagent (Sensibeads) is coated with streptavidin and contains photosensitive dye. The second bead reagent (Chemibeads) is coated with a second antibody specific for a second independent epitope on NT-proBNP and contains chemiluminescent dye. Sample is incubated with Chemibeads and biotinylated antibody to form a particle/NT-proBNP/biotinylated antibody sandwich. Sensibeads then are added and bind to the biotin to form a bead-aggregated immunocomplex. Illumination of the complex by light at 680 nm generates singlet oxygen from Sensibeads, which diffuses to the Chemibeads and triggers a chemiluminescent reaction. The resulting chemiluminescent signal is measured at 612 nm and is directly proportional to the concentration of NT-proBNP in the sample.<sup>18,19,20</sup>

#### Reagents

| Wells <sup>a</sup> | Form   | Ingredient              | Concentration <sup>b</sup> | Source                     |
|--------------------|--------|-------------------------|----------------------------|----------------------------|
| 1 – 2              | Liquid | Biotinylated antibody   | 8 µg/mL                    | Sheep, monoclonal          |
| 3 – 4              | Liquid | NT-proBNP chemibeads    | 150 µg/mL                  | Sheep, monoclonal          |
| 7 – 8              | Liquid | Streptavidin Sensibeads | 1400 µg/mL                 | Recombinant <i>E. coli</i> |
| 9 – 12             | Liquid | Assay buffer            |                            |                            |

a. Wells are numbered consecutively from the wide end of the cartridge.

b. Nominal value per well in a cartridge.

#### Risk and Safety:

H317  
P280, P272, P302 + P352, P333 + P313, P501

#### Warning!

May cause an allergic skin reaction.

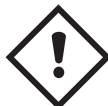

Wear protective gloves/protective clothing/eye protection/face protection. Contaminated work clothing should not be allowed out of the workplace. IF ON SKIN: Wash with plenty of soap and water. If skin irritation or rash occurs: Get medical advice/attention. Dispose of contents and container in accordance with all local, regional, and national regulations.

**Contains:** 5-chloro-2-methyl-3(2h)-isothiazolone mixture with 2-methyl-3(2h)-isothiazolone.

Safety data sheets (MSDS/SDS) available on [siemens.com/healthcare](http://siemens.com/healthcare)

**Precautions:** Used LOCI® reaction vessels contain human body fluids; handle with appropriate care to avoid skin contact or ingestion.

For *in vitro* diagnostic use.

**Reagent Preparation:** All reagents are liquid and ready to use.

**Store at:** 2 – 8 °C

**Expiration:** Refer to carton for expiration date of individual unopened reagent cartridges. Sealed wells on the instrument are stable for 30 days.

**Open well stability:** 5 days for wells 1 – 12

**Specimen Collection and Handling:** Recommended specimen types: Serum or plasma samples (lithium heparin, sodium heparin, and EDTA).

**Samples and controls stabilized with azide cannot be used.**

Serum and plasma can be collected using recommended procedures for collection of diagnostic blood specimens by venipuncture.<sup>21,22,23</sup> Each laboratory must determine its appropriate sample timing/ collection protocol.

Follow the instructions provided with your specimen collection device for use and processing.<sup>23</sup>

Complete clot formation should take place before centrifugation. Serum or plasma should be physically separated from cells as soon as possible with a maximum limit of two hours from the time of collection.<sup>24</sup> Specimens should be free of particulate matter.

If clotting time is increased due to thrombolytic or anticoagulant therapy, the use of plasma specimens will allow for faster sample processing and reduce the risk of interference by particulate matter.<sup>21,24</sup>

Samples are stable for three days when stored at 20 – 25 °C or at 2 – 8 °C or for 12 months when frozen at -20 °C or below.<sup>25</sup> Repetitive freezing and thawing of specimens should be avoided.

Ensure that patient samples, calibrators, and controls are equilibrated at ambient temperature (22 – 28 °C) before testing. Samples containing precipitates must be centrifuged before performing the assay.

#### Procedure

##### Materials Provided

PBNP Flex® reagent cartridge, Cat. No. K6423A

##### Materials Required But Not Provided

PBNP CAL, Cat. No. KC676A

#### Quality Control products such as:

- MAS® CardiImmune® proBNP Control / MAS® CardiImmune® TL/XL MoniTrol Cardiac TL
- CardiImmune® TL Liquid Assayed Cardiac Marker Control
- MAS® and CardiImmune® are registered trademarks of Medical Analysis Systems, Inc. Camarillo, CA.
- Bio-Rad Liquichek™ Cardiac Markers Controls
- Liquichek™ is a trademark of Bio-Rad Laboratories, Irvine, California 92618.
- Audit™ MicroFD™ BNP Control
- Audit™ and MicroFD™ are trademarks of Audit™ MicroControls, Inc. Las Vegas, NV 89102.

#### Test Steps

Sampling, reagent delivery, mixing, and processing are automatically performed by the Dimension Vista® System. For details of this processing, refer to your Dimension Vista® Operator's Guide.

#### Test Conditions

|                                         |                   |
|-----------------------------------------|-------------------|
| Sample Volume (delivered to the vessel) | 8 µL              |
| Chemibead Reagent Volume                | 20 µL             |
| Biotinylated Antibody Reagent Volume    | 20 µL             |
| Sensibead Volume                        | 15 µL             |
| Assay Buffer Volume                     | 100 µL            |
| Temperature                             | 37.0 °C           |
| Reaction time                           | 10 minutes        |
| Wavelength                              | 680 and 612 nm    |
| Type of Measurement                     | Chemiluminescence |

#### Calibration

|                                |                                                                                                                                                                                                                                                                                                             |
|--------------------------------|-------------------------------------------------------------------------------------------------------------------------------------------------------------------------------------------------------------------------------------------------------------------------------------------------------------|
| Calibration Material           | PBNP Calibrator, Cat. No. KC676A                                                                                                                                                                                                                                                                            |
| Calibration Scheme             | 5 levels, n = 3                                                                                                                                                                                                                                                                                             |
| Units                          | pg/mL                                                                                                                                                                                                                                                                                                       |
| Typical Calibration Levels     | Level 1 (Calibrator A): 0 pg/mL<br>Level 2 (Calibrator B): 250 pg/mL<br>Level 3 (Calibrator C): 1500 pg/mL<br>Level 4 (Calibrator D): 12000 pg/mL<br>Level 5 (Calibrator E): 36750 pg/mL                                                                                                                    |
| Calibration Frequency          | Every 30 days for any one lot<br>Calibration interval may be extended based on acceptable verification of calibration.                                                                                                                                                                                      |
| A new calibration is required: | <ul style="list-style-type: none"> <li>• For each new lot of Flex® reagent cartridges</li> <li>• After major maintenance or service, if indicated by quality control results</li> <li>• As indicated in laboratory quality control procedures</li> <li>• When required by government regulations</li> </ul> |

### Quality Control

At least once each day of use, analyze two levels of a Quality Control (QC) material with known NT-proBNP concentrations. Follow your laboratory internal QC procedures if the results obtained are outside acceptable limits.

**Results:** The instrument calculates the concentration of PBNP in pg/mL using the calculation scheme described in your Dimension Vista® Operator's Guide.

**Results of this test should always be interpreted in conjunction with the patient's medical history, clinical presentation and other findings.**

### Analytical Measurement Range (AMR): 5 – 35000 pg/mL

This is the range of analyte values that can be measured directly from the specimen without any dilution or pretreatment that is not part of the usual analytical process and is equivalent to the assay range.

- Samples with results in excess of 35000 pg/mL should be repeated on dilution.
  - Manual Dilution: Dilute 5 fold with Reagent grade water to obtain results within reportable range. Enter dilution factor on the instrument. Reassay. Resulting readout is corrected for dilution.
  - Autodilution (AD): Instrument does a 1:5 dilution in the aliquot tray and the normal 8 µL sample is still used for over range samples. Refer to your Dimension Vista® Operator's Guide.
- Samples with results less than 5 pg/mL will be reported as "less than 5 pg/mL" by the instrument.

### Limitations of Procedure

Concentrations of natriuretic peptides may be elevated in patients with acute myocardial infarction, patients that are candidates for renal dialysis, and patients that have undergone renal dialysis. Patient samples may contain heterophilic antibodies that could react in immunoassays to give falsely elevated or depressed results. This assay has been designed to minimize interference from heterophilic antibodies. Nevertheless, complete elimination of this interference from all patient specimens cannot be guaranteed. A test result that is inconsistent with the clinical picture and patient history should be interpreted with caution.<sup>26,27</sup>

The instrument reporting system contains flags and comments to provide the user with information regarding instrument processing errors, instrument status information and potential errors in PBNP results. Refer to your Dimension Vista® Operator's Guide for the meaning of report flags and comments. Any report containing flags and/or comments should be addressed according to your laboratory's procedure manual and not reported.

Specimens that contain biotin at a concentration of 100 ng/mL demonstrate a less than or equal to 10% change in results. Biotin concentrations greater than this may lead to falsely depressed results for patient samples.

Results from patients taking biotin supplements or receiving high-dose biotin therapy should be interpreted with caution due to possible interference with this test.

### Maximum Observed Repeatability

The expected maximum observed standard deviations for repeatability (within-run precision) using n = 5 replicates at the following analyte concentrations are:

| PBNP concentration | Acceptable SD Maximum |
|--------------------|-----------------------|
| 125 pg/mL          | 6.5 pg/mL             |
| 450 pg/mL          | 21.4 pg/mL            |

A system malfunction may exist if the acceptable SD maximum is exceeded.

### Expected Values

NT-proBNP concentrations in the Reference Group are shown in the following tables. Each laboratory should establish its own reference interval for the PBNP method as determined on the Dimension Vista® System. The recommended medical decision thresholds, by age group, are:

Patients < 75 years: 125 pg/mL  
 Patients ≥ 75 years: 450 pg/mL

### Reference Study Group

NT-proBNP concentrations were determined in 318 individuals without congestive heart failure (163 women and 155 men). This population included apparently healthy individuals and individuals with diabetes, hypertension, and pulmonary disease. The statistics for NT-proBNP concentrations in the reference study group are shown in the following table.

### Reference Study Group

| All             | <55 yrs | 55 – 64 yrs | 65 – 74 yrs | ≥ 75 yrs |
|-----------------|---------|-------------|-------------|----------|
| Mean            | 45.9    | 54.6        | 175.5       | 451.3    |
| SD              | 53.6    | 62.3        | 197.6       | 987.1    |
| Median          | 27.2    | 28.8        | 106.2       | 173.5    |
| 95th Percentile | 131.2   | 206.6       | 880.8       | 1615.7   |
| % < 125 pg/mL   | 94%     | 80%         | 61%         | -        |
| % < 450 pg/mL   | -       | -           | -           | 79%      |
| N               | 163     | 15          | 18          | 122      |

  

| Males           | <55 yrs | 55 – 64 yrs | 65 – 74 yrs | ≥ 75 yrs |
|-----------------|---------|-------------|-------------|----------|
| Mean            | 39.0    | 56.7        | 219.4       | 520.8    |
| SD              | 57.8    | 58.2        | 242.4       | 1080.9   |
| Median          | 16.6    | 25.4        | 123.6       | 173.5    |
| 95th Percentile | 168.8   | 154.7       | 880.8       | 1969.7   |
| % < 125 pg/mL   | 93%     | 83%         | 55%         | -        |
| % < 450 pg/mL   | -       | -           | -           | 73%      |
| N               | 76      | 6           | 11          | 62       |

  

| Females         | <55 yrs | 55 – 64 yrs | 65 – 74 yrs | ≥ 75 yrs |
|-----------------|---------|-------------|-------------|----------|
| Mean            | 51.9    | 53.2        | 106.6       | 379.5    |
| SD              | 49.2    | 68.3        | 60.8        | 883.1    |
| Median          | 39.4    | 28.8        | 87.7        | 167.3    |
| 95th Percentile | 124.0   | 206.6       | 215.2       | 1453.2   |
| % < 125 pg/mL   | 95%     | 78%         | 71%         | -        |
| % < 450 pg/mL   | -       | -           | -           | 85%      |
| N               | 87      | 9           | 7           | 60       |

### Disease Study Group

Blood samples were obtained from 269 patients diagnosed with congestive heart failure (CHF). The population included 78 women and 191 men. The descriptive statistics and New York Heart Association (NYHA) functional classes are provided below. Each laboratory should establish a reference range that represents the patient population that is to be evaluated. In addition, laboratories should be aware of their institution's current practice for the evaluation of CHF.

### CHF Population – All

|                 | <55 yrs | 55 – 64 yrs | 65 – 74 yrs | ≥75 yrs |
|-----------------|---------|-------------|-------------|---------|
| Mean            | 6131.8  | 4455.5      | 6168.1      | 8142.7  |
| SD              | 13470.3 | 9296.0      | 10950.5     | 12699.1 |
| Median          | 1550.9  | 1639.5      | 2541.3      | 3780.5  |
| 95th Percentile | 28099.6 | 19481.5     | 17768.6     | 26923.1 |
| % > 125 pg/mL   | 89%     | 92%         | 95%         | -       |
| % > 450 pg/mL   | -       | -           | -           | 94%     |
| N               | 72      | 72          | 59          | 66      |

### CHF Population – Males

|                 | <55 yrs | 55 – 64 yrs | 65 – 74 yrs | ≥75 yrs |
|-----------------|---------|-------------|-------------|---------|
| Mean            | 7771.4  | 4954        | 6537.2      | 8827.3  |
| SD              | 15797.2 | 10536.7     | 12383.9     | 12856.6 |
| Median          | 2526.1  | 1699.8      | 2541.3      | 5529.2  |
| 95th Percentile | 31237.1 | 19481.5     | 17768.6     | 18634.8 |
| % > 125 pg/mL   | 94%     | 94%         | 93%         | -       |
| % > 450 pg/mL   | -       | -           | -           | 96%     |
| N               | 48      | 51          | 43          | 49      |

### CHF Population – Females

|                 | <55 yrs | 55 – 64 yrs | 65 – 74 yrs | ≥75 yrs |
|-----------------|---------|-------------|-------------|---------|
| Mean            | 2852.6  | 3244.9      | 5176.1      | 6169.7  |
| SD              | 5774.0  | 5200.7      | 5727.8      | 12397.4 |
| Median          | 452.3   | 1516.9      | 2270.8      | 1125.3  |
| 95th Percentile | 15569.3 | 7903.1      | 16889.9     | 45824.4 |
| % > 125 pg/mL   | 79%     | 86%         | 100%        | -       |
| % > 450 pg/mL   | -       | -           | -           | 88%     |
| N               | 24      | 21          | 16          | 17      |

### CHF Population – All

| NYHA Functional Class | All CHF |         |         |          |         |
|-----------------------|---------|---------|---------|----------|---------|
|                       | All CHF | NYHA I  | NYHA II | NYHA III | NYHA IV |
| Mean                  | 6184.5  | 3941.9  | 3648.8  | 6643.1   | 11089.2 |
| SD                    | 11737.8 | 8461.3  | 4897.0  | 13567.0  | 14428.2 |
| Median                | 2282.2  | 1161.0  | 1091.7  | 2541.3   | 4537.7  |
| 5th Percentile        | 101.1   | 100.4   | 46.6    | 143.1    | 74.6    |
| 95th Percentile       | 22331.9 | 14184.1 | 14238.5 | 17497.1  | 28099.6 |
| % > Cutoff            | 92%     | 93%     | 90%     | 94%      | 88%     |
| Minimum               | 5.1     | 52.8    | 24.5    | 5.1      | 39.6    |
| Maximum               | 91446.4 | 52327.0 | 18634.8 | 91446.4  | 78045.2 |
| N                     | 269     | 45      | 60      | 124      | 40      |

### CHF Population – Males

| NYHA Functional Class | All CHF |         |         |          |         |
|-----------------------|---------|---------|---------|----------|---------|
|                       | All CHF | NYHA I  | NYHA II | NYHA III | NYHA IV |
| Mean                  | 7012.1  | 4567.5  | 4402.2  | 7298.4   | 14351.2 |
| SD                    | 12991.9 | 9204.3  | 5167.4  | 14789.5  | 17258.9 |
| Median                | 3162.6  | 1639.5  | 2230.9  | 3442.2   | 6015.9  |
| 5th Percentile        | 126.1   | 136.3   | 46.5    | 126.1    | 101.1   |
| 95th Percentile       | 24004.7 | 19481.5 | 14238.5 | 17497.1  | 31237.1 |
| % > Cutoff            | 94%     | 97%     | 93%     | 95%      | 91%     |
| Minimum               | 5.1     | 72.5    | 44.7    | 5.1      | 74.6    |
| Maximum               | 91446.4 | 52327.0 | 18634.8 | 91446.4  | 78045.2 |
| N                     | 191     | 37      | 40      | 91       | 23      |

### CHF Population – Females

| NYHA Functional Class | All CHF |        |         |          |         |
|-----------------------|---------|--------|---------|----------|---------|
|                       | All CHF | NYHA I | NYHA II | NYHA III | NYHA IV |
| Mean                  | 4157.8  | 1048.3 | 2142.1  | 4836.0   | 6676.0  |
| SD                    | 7561.7  | 1636.1 | 4008.9  | 9366.5   | 7864.9  |
| Median                | 950.2   | 225.4  | 705.3   | 1286.7   | 3780.5  |
| 5th Percentile        | 84.3    | 52.8   | 24.5    | 143.1    | 39.6    |
| 95th Percentile       | 22331.9 | 4960.2 | 11020.8 | 26923.1  | 22997.0 |
| % > Cutoff            | 87%     | 75%    | 85%     | 94%      | 82%     |
| Minimum               | 24.5    | 52.8   | 24.5    | 126.8    | 39.6    |
| Maximum               | 45824.4 | 4960.2 | 15893.8 | 45824.4  | 22997.0 |
| N                     | 78      | 8      | 20      | 33       | 17      |

These results show that there is a relationship between the severity of the clinical signs and symptoms of CHF and the median NT-proBNP concentration, demonstrating that the Dimension Vista® PBNP method can be used as an aid in the diagnosis of all degrees of CHF severity including asymptomatic patients.

## Interpretation of Results

The Receiver Operator Characteristics (ROC) Curve presents the clinical sensitivity and specificity at various cutoffs for the 269 patients diagnosed with CHF and 318 subjects without CHF. The ROC curve for the Dimension Vista® PBNP assay is shown below. The area under ROC curve (AUC) for the Dimension Vista® PBNP assay is 0.928 with a 95% confidence interval of 0.907 to 0.949.

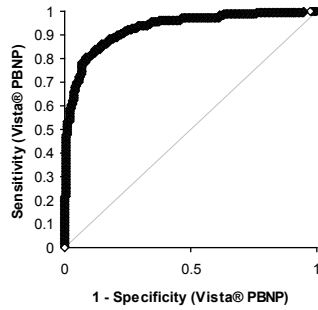

A box and whiskers plot of the clinical study population is presented below. Recommended clinical thresholds are 125 pg/mL for patients younger than 75 years and 450 pg/mL for patients 75 years and older. Six disease group samples with values above the assay range are not displayed in the plot.

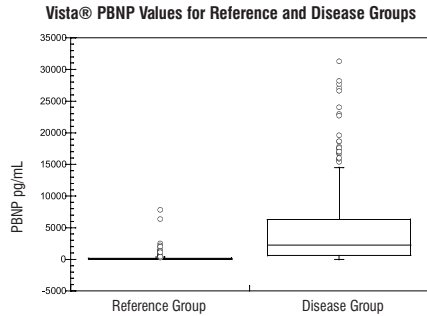

## Sensitivity and Specificity vs. Age and Gender

The tables below show the clinical sensitivity and specificity of the Dimension Vista® PBNP assay using a cutoff of 125 pg/mL for patients younger than 75 years and 450 pg/mL for patients 75 years or older.

|                         | Males         |             |
|-------------------------|---------------|-------------|
|                         | <75 yrs       | ≥75 yrs     |
| Sensitivity             | 94% (133/142) | 96% (47/49) |
| 95% Confidence Interval | 90 – 98       | 90 – 100    |
| Specificity             | 87% (81/93)   | 73% (45/62) |
| 95% Confidence Interval | 80 – 94       | 61 – 84     |

|                         | Females      |             |
|-------------------------|--------------|-------------|
|                         | <75 yrs      | ≥75 yrs     |
| Sensitivity             | 89% (54/61)  | 88% (15/17) |
| 95% Confidence Interval | 81 – 97      | 73 – 100    |
| Specificity             | 92% (95/103) | 85% (51/60) |
| 95% Confidence Interval | 87 – 97      | 76 – 94     |

## Age-matched ROC analysis

An age-matched ROC analysis of the clinical data was performed via the weighted method described in Kondratovich (2002).<sup>29</sup> The resulting AUC is 0.929 with a 95% confidence interval of 0.909 to 0.950.

## Specific Performance Characteristics

The following data represent typical performance for the Dimension Vista® System.

### Precision<sup>29,c</sup>

| Material     | Mean pg/mL | Standard Deviation (%CV) |               |
|--------------|------------|--------------------------|---------------|
|              |            | Repeatability            | Within-Lab    |
| Serum Pool 1 | 120        | 1.72 (1.4)               | 2.06 (1.7)    |
| Serum Pool 2 | 438        | 4.75 (1.1)               | 4.75 (1.1)    |
| Serum Pool 3 | 880        | 9.05 (1.0)               | 12.24 (1.4)   |
| Serum Pool 4 | 5075       | 69.06 (1.4)              | 91.97 (1.8)   |
| Internal QC  | 32633      | 763.39 (2.3)             | 1140.27 (3.5) |

c. CLSI/NCCLS EP5-A2 was used. During each day of testing, two separate runs, with two test samples, for each test material, were analyzed for 20 days.

## Method Comparison<sup>30,d</sup>

### Serum and Plasma Equivalency

Comparison testing results on the Dimension Vista® System for lithium heparin, sodium heparin and EDTA plasma samples versus serum samples is provided as follows:

| Comparative Specimen | Slope | Intercept pg/mL | Correlation Coefficient | n  |
|----------------------|-------|-----------------|-------------------------|----|
| Li Heparin           | 1.01  | -2.0            | 0.9984                  | 53 |
| Na Heparin           | 1.00  | 4.8             | 0.9987                  | 57 |
| EDTA                 | 1.00  | 0.5             | 0.9997                  | 59 |

d. Model equation by Passing-Bablok regression is: [results for Dimension Vista® System] = slope x [serum results] + intercept.

### Regression Statistics<sup>e</sup>

| Comparative Method                 | Slope | Intercept pg/mL | Correlation Coefficient | n                |
|------------------------------------|-------|-----------------|-------------------------|------------------|
| Dimension Vista® PBNP (polyclonal) | 1.02  | -3.2            | 0.996                   | 160 <sup>f</sup> |

e. CLSI/NCCLS EP9-A2 was used. The method used to fit the regression line was Passing-Bablok Statistics.

f. The range of 160 values in the correlation study was 12 – 29519 pg/mL.

## Specificity

### HIL interference

The PBNP method was evaluated for interference to hemoglobin, icterus and lipemia (HIL) according to CLSI/NCCLS EP7-A2.<sup>31</sup> Bias is the difference in the results between the control sample (without the interferent) and the test sample (contains the interferent) expressed in percent. Bias exceeding 10% is considered interference.

| Substance Tested         | Substance Concentration          | NT-proBNP pg/mL | Bias* % |
|--------------------------|----------------------------------|-----------------|---------|
| Hemoglobin (hemolysate)  | Hemoglobin (monomer)             | 134             |         |
|                          | 1000 mg/dL [mmol/L] <sup>a</sup> | 2044            | < 10    |
| Bilirubin (unconjugated) | 60 mg/dL [1026 μmol/L]           | 132             |         |
|                          |                                  | 2019            | < 10    |
| Bilirubin (conjugated)   | 60 mg/dL [1026 μmol/L]           | 134             |         |
|                          |                                  | 2066            | < 10    |
| Lipemia (Intralipid®)    | 3000 mg/dL [33.9 mmol/L]         | 131             |         |
|                          |                                  | 2028            | < 10    |

Intralipid® is a registered trademark of Fresenius Kabi AG, Bad Homburg, Germany.

\* Analyte results should not be corrected based on this bias.

g. Système International d'Unités [SI units] are in brackets.

### Non Interfering Substances

The following substances do not interfere with the PBNP method when present in serum at the concentrations indicated. Inaccuracies (biases) due to these substances are less than 10% at NT-proBNP concentration of 135 and 2000 pg/mL.

| Compound              | Concentration | SI Units     |
|-----------------------|---------------|--------------|
| Abciximab             | 21 μg/mL      | 441 μmol/L   |
| Acetaminophen         | 0.025 mg/dL   | 1.66 μmol/L  |
| Allopurinol           | 2.5 mg/dL     | 184 μmol/L   |
| Amikacin              | 15 mg/dL      | 256 μmol/L   |
| Amiodarone            | 20 μg/mL      | 31 μmol/L    |
| Amiodipine Besylate   | 4 μg/mL       | 7.1 μmol/L   |
| Ampicillin            | 5.3 mg/dL     | 152 μmol/L   |
| Ascorbic Acid         | 5 mg/dL       | 227 μmol/L   |
| Atenolol              | 1.0 mg/dL     | 37.6 μmol/L  |
| Atorvastatin          | 32 mg/dL      | 26.5 μmol/L  |
| Caffeine              | 6 mg/dL       | 308 μmol/L   |
| Captopril             | 5.0 mg/dL     | 230 μmol/L   |
| Carbamazepine         | 3 mg/dL       | 127 μmol/L   |
| Chloramphenicol       | 5 mg/dL       | 155 μmol/L   |
| Chlordiazepoxide      | 1 mg/dL       | 33.3 μmol/L  |
| Chlorpromazine        | 0.2 mg/dL     | 6.27 μmol/L  |
| Cholesterol           | 500 mg/dL     | 12.9 mmol/L  |
| Cimetidine            | 2 mg/dL       | 79.2 μmol/L  |
| Cinnarizine           | 3.0 mg/dL     | 81.4 μmol/L  |
| Clopidogrel bisulfate | 30 μg/mL      | 71.4 μmol/L  |
| Creatinine            | 30 mg/dL      | 2652 μmol/L  |
| Cyclosporine A        | 4000 ng/mL    | 3.3 μmol/L   |
| Dextran 40            | 6000 mg/dL    | 1500 μmol/L  |
| Diazepam              | 0.5 mg/dL     | 17.6 μmol/L  |
| Diclofenac            | 60 μg/mL      | 188.6 μmol/L |
| Digitoxin             | 60 ng/mL      | 78.6 nmol/L  |
| Digoxin               | 5 ng/mL       | 6.15 nmol/L  |
| Diltiazem             | 120 μg/mL     | 266.1 μmol/L |
| Dipyridamole          | 30 μg/mL      | 59.4 μmol/L  |
| Disopyramide          | 40 μg/mL      | 117 μmol/L   |
| Dopamine              | 65 mg/dL      | 3.4 mmol/L   |
| Enalapril maleate     | 16 μg/mL      | 32.5 μmol/L  |
| Erythromycin          | 6 mg/dL       | 81.6 μmol/L  |
| Ethanol               | 400 mg/dL     | 86.8 mmol/L  |
| Ethosuximide          | 25 mg/dL      | 1770 μmol/L  |
| Furosemide            | 6 mg/dL       | 181 μmol/L   |
| Gentamicin            | 12 mg/dL      | 251 μmol/L   |

| Compound               | Concentration | SI Units      |
|------------------------|---------------|---------------|
| Heparin                | 3 U/mL        | 3000 U/L      |
| Hydralazine            | 20 µg/mL      | 101.7 µmol/L  |
| Hydrochlorothiazide    | 20 µg/mL      | 67.2 µmol/L   |
| Ibuprofen              | 50 mg/dL      | 2425 µmol/L   |
| Immunoglobulin G (IgG) | 5 g/dL        | 50 g/L        |
| Indomethacin           | 16 µg/mL      | 36.9 µmol/L   |
| Isosorbide dinitrate   | 6.0 mg/dL     | 254 µmol/L    |
| Lidocaine              | 1.2 mg/dL     | 51.2 µmol/L   |
| Lisinopryl             | 16 µg/mL      | 36.2 µmol/L   |
| Lithium                | 2.3 mg/dL     | 3.2 mmol/L    |
| Lovastatin             | 16 µg/mL      | 39.6 µmol/L   |
| L-thyroxine            | 60 µg/dL      | 0.77 µmol/L   |
| Methyldopa             | 2.5 mg/dL     | 118 µmol/L    |
| Milrinone lactate      | 2.4 µg/mL     | 11.4 µmol/L   |
| Nicotine               | 0.1 mg/dL     | 6.2 µmol/L    |
| Nifedipine             | 6.0 mg/dL     | 173 µmol/L    |
| Nitrofurantoin         | 40 µg/mL      | 168 µmol/L    |
| Nitroglycerin          | 0.16 µg/mL    | 0.577 µmol/L  |
| Oxazepam               | 12 µg/mL      | 41.8 µmol/L   |
| Oxytetracycline        | 100 µg/mL     | 217.2 µmol/L  |
| Penicillin G           | 25 U/mL       | 25000 U/L     |
| Pentobarbital          | 8 mg/dL       | 354 µmol/L    |
| Phenobarbital          | 10 mg/dL      | 431 µmol/L    |
| Phenytoin              | 5 mg/dL       | 198 µmol/L    |
| Primidone              | 4 mg/dL       | 183 µmol/L    |
| Probenecid             | 200 µg/mL     | 700.9 µmol/L  |
| Propoxyphene           | 0.2 mg/dL     | 4.91 µmol/L   |
| Propranolol            | 0.15 mg/dL    | 5.1 µmol/L    |
| Protein: Albumin       | 6 g/dL        | 60 g/L        |
| Protein: Total         | 11.1 g/dL     | 111 g/L       |
| Quinidine              | 20 µg/mL      | 61.6 µmol/L   |
| Rheumatoid Factor      | 500 IU/mL     | 500 IU/mL     |
| Salicylic Acid         | 60 mg/dL      | 4.34 mmol/L   |
| Simvastatin            | 32 µg/mL      | 76.5 µmol/L   |
| Sulfamethoxazole       | 320 µg/mL     | 1263.3 µmol/L |
| Theophylline           | 4 mg/dL       | 222 µmol/L    |
| Trimethoprim           | 64 µg/mL      | 220.7 µmol/L  |
| Urea                   | 500 mg/dL     | 83.3 mmol/L   |
| Uric Acid              | 20 mg/dL      | 1190 µmol/L   |
| Valproic Acid          | 50 mg/dL      | 3467 µmol/L   |
| Verapamil              | 16 mg/dL      | 0.33 µmol/L   |
| Warfarin               | 4 µg/mL       | 130 µmol/L    |

#### Hook effect

One step sandwich immunoassays are susceptible to a high dose "hook effect", where an excess of antigen prevents simultaneous binding of the capture and detection antibodies to a single analyte molecule.<sup>32</sup> Such samples must be diluted and reassayed prior to reporting the results. The PBNP method shows no hook effect up to 400,000 pg/mL.

#### Cross-reactivity

The following substances have no significant cross-reactivity (less than 1%) at the concentrations indicated when added to samples containing 0 and approximately 125 pg/mL NT-proBNP:

| Substance                                                  | Concentration |
|------------------------------------------------------------|---------------|
| ANP <sub>28</sub>                                          | 3.1 µg/mL     |
| NT-proANP <sub>1-30</sub> (preproANP <sub>26-55</sub> )    | 3.5 µg/mL     |
| NT-proANP <sub>31-67</sub> (preproANP <sub>56-92</sub> )   | 1.0 ng/mL     |
| NT-proANP <sub>79-98</sub> (preproANP <sub>104-123</sub> ) | 1.0 ng/mL     |
| BNP <sub>32</sub> (Natreacor®)                             | 3.5 µg/mL     |
| CNP <sub>32</sub>                                          | 2.2 µg/mL     |
| DNP                                                        | 1.0 ng/mL     |
| VNP                                                        | 1.0 ng/mL     |
| Adrenomedullin                                             | 1.0 ng/mL     |
| Aldosterone                                                | 0.6 ng/mL     |
| Angiotensin I                                              | 0.6 ng/mL     |
| Angiotensin II                                             | 0.6 ng/mL     |
| Angiotensin III                                            | 1.0 ng/mL     |
| Endothelin                                                 | 20 pg/mL      |
| Renin                                                      | 50 ng/mL      |
| Urodilatin                                                 | 3.5 µg/mL     |
| Arg-Vasopressin                                            | 1.0 ng/mL     |

#### Analytical Sensitivity: ≤ 5 pg/mL

The analytical sensitivity of the PBNP method is ≤ 5 pg/mL. Analytical sensitivity is defined as the concentration at two standard deviations (n = 20) above a sample devoid of NT-proBNP such as the PBNP Level 1 Calibrator (0 pg/mL).

#### Limit of Detection: 0.8 pg/mL

The Limit of Detection (LoD) for ANALYTE is 0.8 pg/mL, determined consistent with CLSI guideline EP17-A and with proportions of false positives (α) less than 5% and false negatives (β) less than 5%; based on 60 determinations, with 5 blank and 5 low level samples. LOD is the lowest concentration that can be detected reliably.

#### Functional Sensitivity: Evaluation of the 20% CV limit

Functional sensitivity was evaluated by determining the total imprecision of natural NT-proBNP serum samples. Total imprecision was measured by a two replicate per day, twenty day ANOVA study. The functional sensitivity/ imprecision profile for the Dimension Vista® PBNP method corresponds to a coefficient of variation (CV) of 20% at an NT-proBNP level of ≤ 30 pg/mL.

#### Dilutional Linearity

A patient plasma sample with a high NT-proBNP concentration was diluted across the assay range. Additional plasma samples were diluted linearly to confirm dilutional accuracy at the low end of the assay range. All samples were diluted with low level patient plasma pools. The following table summarizes the results of these studies:

|                                | Sample A | Sample B |
|--------------------------------|----------|----------|
| Starting Concentration (pg/mL) | 41812    | 1266     |
| <b>Regression Statistics</b>   |          |          |
| Slope                          | 1.004    | 1.003    |
| Intercept                      | -55.8    | -3.5     |
| Correlation Coefficient        | 0.999    | 0.999    |
| N                              | 5        | 5        |
| <b>% Recovery</b>              |          |          |
| Average                        | 99.9     | 99.5     |
| Range                          | 98 – 101 | 98 – 100 |

Manufactured under license from Roche Diagnostics.

US 5786163 and foreign equivalents

US Patent Application: 09/890442 and foreign equivalents

**Symbols Key:** See Adjacent Panel.

**Bibliography:** See Adjacent Panel.

Dimension Vista®, LOCI®, Dimension®, and Flex® are trademarks of Siemens Healthcare Diagnostics.

©2008 Siemens Healthcare Diagnostics

All rights reserved.

## Dimension Vista® System

### Flex® reagent cartridge

### PBNP

Siehe schraffierte Abschnitte; Aktualisierte Informationen gegenüber der Version 2017-04.

Ausgabedatum 2017-10-17

#### N-terminales natriuretisches Peptid vom pro-B-Typ

**Verwendungszweck:** Der PBNP-Test ist ein *In-vitro*-Diagnostikum zur quantitativen Bestimmung des N-terminalen natriuretischen Peptids vom pro-B-Typ (NT-proBNP) in Humanserum und -plasma auf dem Dimension Vista®-System. Bestimmungen von NT-proBNP werden in der Diagnostik von Patienten mit mittelstarker kongestiver Herzinsuffizienz (CHF) und bei der Bestimmung des Schweregrads eingesetzt. Der Test ist außerdem für die Risikoeinschätzung bei Patienten mit akutem Koronarsyndrom und Herzinsuffizienz indiziert.

**Zusammenfassung:** Eine linksventrikuläre Dysfunktion kann im Rahmen einer koronaren Herzerkrankung, Herzklappenerkrankung, primären Myokardkrankung und eines arteriellen Hypertonus auftreten. Wenn die linksventrikuläre Dysfunktion nicht behandelt wird und fortschreitet, ist das Sterblichkeitsrisiko hoch. Der Patient kann beispielsweise einen plötzlichen Herztod erleiden.

Chronische Herzinsuffizienz ist ein klinisches Syndrom, das von einer Beeinträchtigung der Herzpumpfunktion verursacht wird. Der Schweregrad der Herzinsuffizienz wird laut der New York Heart Association (NYHA) nach den Symptomen in die Gruppen I – IV eingeteilt. Zur Diagnose einer linksventrikulären Dysfunktion werden klinische Tests und Bildgebungsverfahren eingesetzt.<sup>1</sup>

Die Bedeutung natriuretischer Peptide bei der Steuerung des kardiovaskulären Systems ist belegt. Erste Studien ergaben, dass natriuretische Peptide sich für die Diagnose klinischer Probleme mit linksventrikulärer Dysfunktion eignen.<sup>2</sup> Über die folgenden natriuretischen Peptide wird in der Literatur berichtet: atriales natriuretisches Peptid (ANP), B-Typ- (bzw. Brain-)natriuretisches Peptid (BNP) und C-Typ-natriuretisches Peptid (CNP).<sup>3,4</sup>

ANP und BNP haben natriuretische und diuretische Eigenschaften. Als Antagonisten des Renin-Angiotensin-Aldosteron-Systems beeinflussen sie den Elektrolyt- und Flüssigkeitshaushalt im Organismus.<sup>5,6</sup> Bei Patienten mit linksventrikulärer Dysfunktion sind die Serum- und Plasmakonzentrationen von BNP so wie die des biologisch inaktiven Pro-Hormons, proBNP, erhöht. ProBNP besteht aus 108 Aminosäuren. Es wird hauptsächlich vom linken Ventrikel des Herzens sezerniert und dabei in das physiologisch aktive BNP (77 – 108) und das N-terminale Fragment NT-proBNP (1 – 76) aufgespalten.<sup>4</sup>

Studien weisen darauf hin, dass NT-proBNP in diagnostischen und prognostischen Anwendungen eingesetzt werden kann.<sup>7 – 13</sup> Die Konzentration von NT-proBNP im Plasma erlaubt eine Prognose für linksventrikuläre Dysfunktion. Dieser Wert kann auch bei der Unterscheidung von Symptomen bei Herzerkrankungen von solchen bei anderen Erkrankungen dienen.

Die Bestimmung von NT-proBNP kann zur Identifikation von Personen mit linksventrikulärer Dysfunktion eingesetzt werden. Anhand von Änderungen in der NT-proBNP-Konzentration kann der Behandlungserfolg bei Patienten mit linksventrikulärer Dysfunktion beurteilt werden. Es gibt Anzeichen dafür, dass sich NT-proBNP aufgrund seiner Funktionen auch für die Einschätzung vaskulärer Remodellierung eignet und dadurch zum Aufbau individueller Rehabilitationsprogramme beiträgt.<sup>10,11</sup>

Fisher et al. belegen für Patienten mit kongestiver Herzinsuffizienz und erhöhten NT-proBNP-Werten eine Mortalitätsrate innerhalb eines Jahres von 53 % gegenüber 11 % bei Patienten mit niedrigeren Werten.<sup>12</sup> Die Gusto IV-Studie mit über 6800 Patienten ergab, dass NT-proBNP bei Patienten mit akutem Koronarsyndrom der aussagekräftigste unabhängige Vorhersagewert für die Mortalität innerhalb eines Jahres war.<sup>13</sup>

Die Arbeitsgruppe für Diagnose und Behandlung chronischer Herzinsuffizienz der European Society of Cardiology empfiehlt in ihren Richtlinien, dass natriuretische Peptide einschließlich NT-proBNP „als Ausschlussstest klinisch außerordentlich nützlich sein könnten aufgrund konsistenter und sehr hoher negativer prädiktiver Werte“.

NT-proBNP-Konzentrationen sind bei Patienten mit instabiler Angina und bei Patienten nach einem Myokardinfarkt erhöht.<sup>14,15</sup> Wenngleich dies keine Diagnosegrundlage für diese Bedingungen ist, belegen mehrere Studien, dass NT-proBNP-Messungen prognostische Informationen für die kurz- und langfristige Risikoabschätzung bei Patienten mit instabiler Angina oder Myokardinfarkt bieten.<sup>15,16,17</sup>

**Grundlagen des Verfahrens:** Die PBNP-Methode ist ein Schritt-Chemilumineszenz-Immunoassay nach dem Sandwich-Prinzip auf Basis der LOCI®-Technologie. Bei den LOCI® Reagenzien handelt es sich um zwei synthetische Reagenzien (Kügelchen) und ein biotinyliertes monoklonales Antikörperfragment, das ein Epitop am N-terminalen Teil von proBNP erkennt. Die Kügelchen des ersten Reagenz (Sensibeads) sind mit Streptavidin beschichtet und enthalten einen photosensiblen Farbstoff. Beim zweiten Reagenz (Chemibeads) sind die Kügelchen mit einem weiteren Antikörper gegen ein zweites unabhängiges Epitop auf NT-proBNP beschichtet und enthalten einen Chemilumineszenzfarbstoff. Die Probe wird mit den biotinylierten Antikörpern und Chemibeads inkubiert, um Sandwich-Komplexe aus Partikel/NT-proBNP/biotinyliertem Antikörper zu bilden. Anschließend werden Sensibeads hinzugefügt, die sich an das Biotin binden und Kügelchen-Aggregat-Immunkomplexe bilden. Bei einer Belichtung des Komplexes mit 680 nm erzeugen die Sensibeads Singulett-Sauerstoff, der in die Chemibeads diffundiert und eine Chemilumineszenzreaktion auslöst. Das hierdurch erzeugte Chemilumineszenz-Signal ist bei 612 nm messbar und der NT-proBNP-Konzentration in der Probe direkt proportional.<sup>18,19,20</sup>

#### Reagenzien

| Zellen <sup>a</sup> | Form    | Inhaltsstoff              | Konzentration <sup>b</sup> | Ursprung                    |
|---------------------|---------|---------------------------|----------------------------|-----------------------------|
| 1 – 2               | Flüssig | Biotinylierter Antikörper | 8 µg/ml                    | Schaf, monoklonal           |
| 3 – 4               | Flüssig | NT-proBNP-Chemibeads      | 150 µg/ml                  | Schaf, monoklonal           |
| 7 – 8               | Flüssig | Streptavidin Sensibeads   | 1400 µg/ml                 | Rekombinante <i>E. coli</i> |
| 9 – 12              | Flüssig | Testpuffer                |                            |                             |

a. Die Zellen sind vom breiten Ende der Kassette aus durchgehend nummeriert.

b. Nominalwert pro Zelle in einer Kassette.

#### Gefahrenhinweise und Sicherheitssätze:

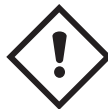

H317  
P280, P272, P302 + P352, P333 + P313, P501

**Warnung!**  
Kann allergische Hautreaktionen verursachen.

Schutzhandschuhe/Schutzkleidung/Augenschutz/Gesichtsschutz tragen. Kontaminierte Arbeitskleidung nicht außerhalb des Arbeitsplatzes tragen. BEI KONTAKT MIT DER HAUT: Mit viel Wasser und Seife waschen. Bei Hautreizung oder -ausschlag: Ärztlichen Rat einholen/ärztliche Hilfe hinzuziehen. Inhalt und Behälter sind in Übereinstimmung mit den gesetzlichen Bestimmungen zu entsorgen.

**Enthält:** 5-chloro-2-methyl-3(2h)-isothiazolone mixture with 2-methyl-3(2h)-isothiazolone

Sicherheitsdatenblätter (MSDS/SDS) verfügbar auf [siemens.com/healthcare](http://siemens.com/healthcare)

**Vorsichtsmaßnahmen:** Gebrauchte LOCI®-Reaktionsgefäße enthalten menschliche Körperflüssigkeiten; mit entsprechender Vorsicht handhaben und Hautkontakt oder Verschlucken vermeiden.

*In-vitro*-Diagnostikum.

**Vorbereitung der Reagenzien:** Alle Reagenzien sind flüssig und gebrauchsfertig.

**Lagerung bei:** 2 – 8 °C

**Verfalldatum:** Verfalldatum einzelner ungeöffneter Reagenzkassetten siehe Umkarton. Verschlossene Zellen sind im Gerät 30 Tage lang stabil.

**Stabilität geöffneter Zellen:** 5 Tage, Zellen 1 – 12

**Probenentnahme und -handhabung:** Empfohlene Probenotypen: Serum und Plasma (Lithium- oder Natriumheparin und EDTA).

**Mit Azid stabilisierte Proben und Kontrollsubstanzen können nicht verwendet werden.**

Serum und Plasma können mit empfohlenen Verfahren zur Entnahme diagnostischer Blutproben durch Venenpunktion gewonnen werden.<sup>21,22,23</sup> Jedes Labor muss für sich eine geeignete Verfahrensweise für den Gewinnungs- und Bearbeitungszeitpunkt festlegen.

Anweisungen zur Verwendung der Probenentnahmevorrichtung und zur Probenverarbeitung beachten.<sup>23</sup>

Vor dem Zentrifugieren sollte die vollständige Gerinnung abgewartet werden. Serum und Plasma müssen innerhalb von 2 Stunden nach der Entnahme von den Zellen getrennt werden.<sup>24</sup> Die Proben müssen partikelfrei sein.

Wenn die Gerinnungszeit aufgrund von thrombolytischer oder gerinnungshemmender Therapie erhöht ist, kann durch die Verwendung von Plasmaproben eine schnellere Probenbearbeitung und ein geringeres Risiko der Partikelbildung erreicht werden.<sup>21,24</sup>

Die Proben sind bei 20 – 25 °C oder 2 – 8 °C drei Tage lang und bei -20 °C oder darunter 12 Monate lang stabil.<sup>25</sup> Wiederholtes Einfrieren und Auftauen der Proben ist zu vermeiden.

Patientenproben, Kalibratoren und Kontrollsubstanzen vor der Analyse Raumtemperatur (22 – 28 °C) annehmen lassen. Proben, die Niederschläge enthalten, müssen vor der Analyse zentrifugiert werden.

#### Verfahren

#### Mitgelieferte Materialien

PBNP Flex®-Reagenzkassette, Kat-Nr. K6423A

#### Erforderliche, aber nicht mitgelieferte Materialien

PBNP CAL, Kat-Nr. KC676A

#### Qualitätskontrollprodukte, wie z. B.:

- MAS® Cardiolmmune® proBNP Kontrollsubstanz / MAS® Cardiolmmune® TL/XL MoniTrol Cardiac TL
- Cardiolmmune® TL Liquid Assayed Cardiac Marker Kontrollsubstanz  
MAS® und Cardiolmmune® sind eingetragene Marken von Medical Analysis Systems, Inc. Camarillo, CA, USA.
- Bio-Rad Liquichek™ Cardiac Markers Kontrollsubstanzen  
Liquichek™ ist eine Marke von Bio-Rad Laboratories, Irvine, California 92618, USA.
- Audit™ MicroFD™ BNP Kontrollsubstanz  
Audit™ und MicroFD™ sind Marken von Audit™ MicroControls, Inc. Las Vegas, NV 89102, USA.

#### Testschritte

Probenentnahme, Reagenzzugabe, Mischung und Bearbeitung werden vom Dimension Vista®-System automatisch durchgeführt. Genaue Informationen zu diesen Vorgängen entnehmen Sie bitte dem Dimension Vista® Bedienungshandbuch.

#### Testbedingungen

|                                          |                  |
|------------------------------------------|------------------|
| Probenvolumen (in das Gefäß abgegeben)   | 8 µl             |
| Volumen Chemibead-Reagenz                | 20 µl            |
| Reagenzvolumen biotinylierter Antikörper | 20 µl            |
| Volumen Sensibeads                       | 15 µl            |
| Volumen Testpuffer                       | 100 µl           |
| Temperatur                               | 37,0 °C          |
| Reaktionszeit                            | 10 Minuten       |
| Wellenlänge                              | 680 und 612 nm   |
| Messverfahren                            | Chemilumineszenz |

## Kalibration

|                                         |                                                                                                                                                                                                                                                                                                                                      |
|-----------------------------------------|--------------------------------------------------------------------------------------------------------------------------------------------------------------------------------------------------------------------------------------------------------------------------------------------------------------------------------------|
| Kalibrationsmaterial                    | PBNP-Kalibrator, Kat-Nr. KC676A                                                                                                                                                                                                                                                                                                      |
| Kalibrierschema                         | 5 Level, n = 3                                                                                                                                                                                                                                                                                                                       |
| Einheiten                               | pg/ml                                                                                                                                                                                                                                                                                                                                |
| Typische Kalibrator-Level               | Level 1 (Kalibrator A): 0 pg/ml<br>Level 2 (Kalibrator B): 250 pg/ml<br>Level 3 (Kalibrator C): 1500 pg/ml<br>Level 4 (Kalibrator D): 12000 pg/ml<br>Level 5 (Kalibrator E): 36750 pg/ml                                                                                                                                             |
| Kalibrationshäufigkeit                  | Nach 30 Tagen mit derselben Charge<br>Das Kalibrationsintervall kann bei akzeptablen Qualitäts- oder Kalibrationskontrollergebnissen verlängert werden.                                                                                                                                                                              |
| Eine neue Kalibration ist erforderlich: | <ul style="list-style-type: none"> <li>Für jede neue Charge von Flex®-Reagenzkassetten</li> <li>Nach größeren Wartungs- oder Servicemaßnahmen, falls die Ergebnisse der Qualitätskontrolle dies nahelegen</li> <li>Nach Maßgabe der Qualitätskontrollverfahren des Labors</li> <li>Nach Maßgabe behördlicher Vorschriften</li> </ul> |

## Qualitätskontrolle

In der Praxis sollten mindestens einmal täglich zwei Konzentrationsstufen eines Qualitätskontroll(QK-)materials mit bekannten NT-proBNP-Konzentrationen analysiert werden. Bei Ergebnissen außerhalb der akzeptablen Grenzwerte nach laborinternen QK-Vorschriften vorgehen.

**Ergebnisse:** Das Gerät gibt die PBNP-Konzentration in pg/ml nach dem Berechnungsschema an, das im Dimension®-Bedienungshandbuch dargestellt ist.

**Resultate dieses Tests sollten stets in Verbindung mit der Vorgeschichte des Patienten, dem klinischen Bild und anderen Untersuchungsergebnissen interpretiert werden.**

### Analytischer Messbereich (AMR): 5 – 35000 pg/ml

Dies ist der Bereich von Analysewerten, der ohne vorherige Verdünnung oder Vorbehandlung, die nicht Teil des üblichen Analysevorgangs ist, in der Probe direkt ermittelt werden kann, und entspricht dem Testbereich.

- Proben mit Ergebnissen von über 35000 pg/ml sollten verdünnt und erneut analysiert werden.  
**Manuelle Verdünnung:** Um Ergebnisse innerhalb des Messbereichs zu erhalten, die Probe im Verhältnis 1:5 mit Wasser von Reagenzqualität verdünnen. Geben Sie den Verdünnungsfaktor ein, und wiederholen Sie den Test. Im Ergebnisausdruck wird die Verdünnung berücksichtigt.

**Automatische Verdünnung (AD):** Das Gerät verdünnt die Aliquote auf der Platte automatisch im Verhältnis 1:5, und die normale 8 µl Probe wird für Proben außerhalb des Bereichs weiterverwendet. Siehe Dimension Vista®-Bedienungshandbuch.

- Für Proben mit Ergebnissen unter 5 pg/ml meldet das Gerät „unter 5 pg/ml“.

### Grenzen des Verfahrens

Die Konzentration natriuretischer Peptide kann bei Patienten mit akutem Myokardinfarkt, Patienten, die eine Dialysebehandlung benötigen, und Patienten, bei denen bereits eine Dialysebehandlung durchgeführt wurde, erhöht sein.

Patientenproben können heterophile Antikörper enthalten, die in Immunoassays zu falsch erhöhten oder zu niedrigen Ergebnissen führen können. Dieser Test wurde so entwickelt, dass eine Interferenz durch heterophile Antikörper minimal ist. Dennoch können derartige Störungen nicht bei allen Patientenproben vollständig ausgeschlossen werden.

Ein vom klinischen Bild und der Vorgeschichte des Patienten abweichendes Testergebnis sollte deshalb mit Vorsicht interpretiert werden.<sup>26,27</sup>

Das integrierte Meldesystem des Geräts macht den Benutzer durch Fehlercodes und Hinweise auf Verarbeitungsfehler und Statusinformationen des Geräts sowie potenzielle Fehler bei den PBNP-Ergebnissen aufmerksam. Informationen zur Bedeutung der Fehlercodes und weitere Hinweise finden Sie im Bedienungshandbuch des Dimension Vista®-Systems. Berichte, die Fehlercodes und Hinweise enthalten, sollten nicht weitergeleitet, sondern nach den im jeweiligen Labor geltenden Richtlinien korrigiert werden.

Proben, die Biotin in einer Konzentration von 100 ng/ml enthalten, zeigen eine Veränderung der Ergebnisse von kleiner oder gleich 10 %. Höhere Biotinkonzentrationen können zu falsch niedrigen Ergebnissen für Patientenproben führen.

Ergebnisse für Patienten, die Biotinpräparate einnehmen oder eine hochdosierte Biotintherapie erhalten, sollten aufgrund der möglichen Interferenz mit diesem Test vorsichtig interpretiert werden.

### Maximale ermittelte Wiederholbarkeit

Die erwarteten maximal beobachteten Standardabweichungen für die Wiederholbarkeit (Präzision innerhalb der Serie) bei n = 5 Replikaten betragen bei folgenden Analytkonzentrationen:

| PBNP-Konzentration | Akzeptable SA-Höchstwerte |
|--------------------|---------------------------|
| 125 pg/ml          | 6.5 pg/ml                 |
| 450 pg/ml          | 21.4 pg/ml                |

Werden die aufgeführten akzeptablen SA-Höchstwerte überschritten, kann es sich um eine Fehlfunktion des Systems handeln:

### Erwartete Werte

Die NT-proBNP-Konzentrationen in der Referenzgruppe sind in den folgenden Tabellen aufgeführt. Jedes Labor sollte seinen eigenen Referenzbereich für die PBNP-Methode unter Verwendung des Dimension Vista®-Systems festlegen. Die empfohlenen medizinischen Entscheidungsgrenzwerte nach Altersgruppe lauten:

Patienten < 75 Jahre: 125 pg/ml

Patienten ≥ 75 Jahre: 450 pg/ml

### Referenzgruppe der Studie

Die NT-proBNP-Konzentrationen wurden bei 318 Personen ohne kongestive Herzinsuffizienz (163 Frauen, 155 Männer) ermittelt. Diese Population umfasste offensichtlich gesunde Personen sowie Personen mit Diabetes, Bluthochdruck und Lungenerkrankung. Die Daten für die NT-proBNP-Konzentrationen in der Referenzgruppe sind in der folgenden Tabelle aufgeführt.

### Referenzgruppe der Studie

| Alle          | < 55 Jahre | 55 – 64 Jahre | 65 – 74 Jahre | ≥ 75 Jahre |
|---------------|------------|---------------|---------------|------------|
| Mittelwert    | 45.9       | 54.6          | 175.5         | 451.3      |
| SA            | 53.6       | 62.3          | 197.6         | 987.1      |
| Medianwert    | 27.2       | 28.8          | 106.2         | 173.5      |
| 95. Perzentil | 131.2      | 206.6         | 880.8         | 1615.7     |
| % < 125 pg/ml | 94 %       | 80 %          | 61 %          | -          |
| % < 450 pg/ml | -          | -             | -             | 79 %       |
| N             | 163        | 15            | 18            | 122        |

## Männer

|               | < 55 Jahre | 55 – 64 Jahre | 65 – 74 Jahre | ≥ 75 Jahre |
|---------------|------------|---------------|---------------|------------|
| Mittelwert    | 39.0       | 56.7          | 219.4         | 520.8      |
| SA            | 57.8       | 58.2          | 242.4         | 1080.9     |
| Medianwert    | 16.6       | 25.4          | 123.6         | 173.5      |
| 95. Perzentil | 168.8      | 154.7         | 880.8         | 1969.7     |
| % < 125 pg/ml | 93 %       | 83 %          | 55 %          | -          |
| % < 450 pg/ml | -          | -             | -             | 73 %       |
| N             | 76         | 6             | 11            | 62         |

## Frauen

|               | < 55 Jahre | 55 – 64 Jahre | 65 – 74 Jahre | ≥ 75 Jahre |
|---------------|------------|---------------|---------------|------------|
| Mittelwert    | 51.9       | 53.2          | 106.6         | 379.5      |
| SA            | 49.2       | 68.3          | 60.8          | 883.1      |
| Medianwert    | 39.4       | 28.8          | 87.7          | 167.3      |
| 95. Perzentil | 124.0      | 206.6         | 215.2         | 1453.2     |
| % < 125 pg/ml | 95 %       | 78 %          | 71 %          | -          |
| % < 450 pg/ml | -          | -             | -             | 85 %       |
| N             | 87         | 9             | 7             | 60         |

## Erkrankungsgruppe der Studie

Es wurden Blutproben von 269 Patienten gewonnen, bei denen eine kongestive Herzinsuffizienz (CHF) diagnostiziert wurde. Die Population umfasste 78 Frauen und 191 Männer. Die Zahlenangaben und die Funktionsklassen der New York Heart Association (NYHA) finden Sie im Folgenden. Jedes Labor sollte einen Referenzbereich ermitteln, der der zu untersuchenden Patientenpopulation entspricht. Außerdem sollte sich das Labor über die aktuell in seiner Einrichtung praktizierte Untersuchungsmethodik bei CHF im Klaren sein.

### CHF-Population – Alle

|               | < 55 Jahre | 55 – 64 Jahre | 65 – 74 Jahre | ≥ 75 Jahre |
|---------------|------------|---------------|---------------|------------|
| Mittelwert    | 6131.8     | 4455.5        | 6168.1        | 8142.7     |
| SA            | 13470.3    | 9296.0        | 10950.5       | 12699.1    |
| Medianwert    | 1550.9     | 1639.5        | 2541.3        | 3780.5     |
| 95. Perzentil | 28099.6    | 19481.5       | 17768.6       | 26923.1    |
| % > 125 pg/ml | 89 %       | 92 %          | 95 %          | -          |
| % > 450 pg/ml | -          | -             | -             | 94 %       |
| N             | 72         | 72            | 59            | 66         |

### CHF-Population – Männer

|               | < 55 Jahre | 55 – 64 Jahre | 65 – 74 Jahre | ≥ 75 Jahre |
|---------------|------------|---------------|---------------|------------|
| Mittelwert    | 7771.4     | 4954          | 6537.2        | 8827.3     |
| SA            | 15797.2    | 10536.7       | 12383.9       | 12856.6    |
| Medianwert    | 2526.1     | 1699.8        | 2541.3        | 5529.2     |
| 95. Perzentil | 31237.1    | 19481.5       | 17768.6       | 18634.8    |
| % > 125 pg/ml | 94 %       | 94 %          | 93 %          | -          |
| % > 450 pg/ml | -          | -             | -             | 96 %       |
| N             | 48         | 51            | 43            | 49         |

### CHF-Population – Frauen

|               | < 55 Jahre | 55 – 64 Jahre | 65 – 74 Jahre | ≥ 75 Jahre |
|---------------|------------|---------------|---------------|------------|
| Mittelwert    | 2852.6     | 3244.9        | 5176.1        | 6169.7     |
| SA            | 5774.0     | 5200.7        | 5727.8        | 12397.4    |
| Medianwert    | 452.3      | 1516.9        | 2270.8        | 1125.3     |
| 95. Perzentil | 15569.3    | 7903.1        | 16889.9       | 45824.4    |
| % > 125 pg/ml | 79 %       | 86 %          | 100 %         | -          |
| % > 450 pg/ml | -          | -             | -             | 88 %       |
| N             | 24         | 21            | 16            | 17         |

### CHF-Population – Alle

| NYHA-Funktionsklasse | Alle CHF | NYHA I  | NYHA II | NYHA III | NYHA IV |
|----------------------|----------|---------|---------|----------|---------|
| Mittelwert           | 6184.5   | 3941.9  | 3648.8  | 6643.1   | 11089.2 |
| SA                   | 11737.8  | 8461.3  | 4897.0  | 13567.0  | 14428.2 |
| Medianwert           | 2282.2   | 1161.0  | 1091.7  | 2541.3   | 4537.7  |
| 5. Perzentil         | 101.1    | 100.4   | 46.6    | 143.1    | 74.6    |
| 95. Perzentil        | 22331.9  | 14184.1 | 14238.5 | 17497.1  | 28099.6 |
| % > Cutoff           | 92 %     | 93 %    | 90 %    | 94 %     | 88 %    |
| Minimum              | 5.1      | 52.8    | 24.5    | 5.1      | 39.6    |
| Maximum              | 91446.4  | 52327.0 | 18634.8 | 91446.4  | 78045.2 |
| N                    | 269      | 45      | 60      | 124      | 40      |

### CHF-Population – Männer

| NYHA-Funktionsklasse | Alle CHF | NYHA I  | NYHA II | NYHA III | NYHA IV |
|----------------------|----------|---------|---------|----------|---------|
| Mittelwert           | 7012.1   | 4567.5  | 4402.2  | 7298.4   | 14351.2 |
| SA                   | 12991.9  | 9204.3  | 5167.4  | 14789.5  | 17258.9 |
| Medianwert           | 3162.6   | 1639.5  | 2230.9  | 3442.2   | 6015.9  |
| 5. Perzentil         | 126.1    | 136.3   | 46.5    | 126.1    | 101.1   |
| 95. Perzentil        | 24004.7  | 19481.5 | 14238.5 | 17497.1  | 31237.1 |
| % > Cutoff           | 94 %     | 97 %    | 93 %    | 95 %     | 91 %    |
| Minimum              | 5.1      | 72.5    | 44.7    | 5.1      | 74.6    |
| Maximum              | 91446.4  | 52327.0 | 18634.8 | 91446.4  | 78045.2 |
| N                    | 191      | 37      | 40      | 91       | 23      |

## CHF-Population – Frauen

### NYHA-Funktionsklasse

|               | Alle CHF | NYHA I | NYHA II | NYHA III | NYHA IV |
|---------------|----------|--------|---------|----------|---------|
| Mittelwert    | 4157.8   | 1048.3 | 2142.1  | 4836.0   | 6676.0  |
| SA            | 7561.7   | 1636.1 | 4008.9  | 9366.5   | 7864.9  |
| Medianwert    | 950.2    | 225.4  | 705.3   | 1286.7   | 3780.5  |
| 5. Perzentil  | 84.3     | 52.8   | 24.5    | 143.1    | 39.6    |
| 95. Perzentil | 22331.9  | 4960.2 | 11020.8 | 26923.1  | 22997.0 |
| % > Cutoff    | 87 %     | 75 %   | 85 %    | 94 %     | 82 %    |
| Minimum       | 24.5     | 52.8   | 24.5    | 126.8    | 39.6    |
| Maximum       | 45824.4  | 4960.2 | 15893.8 | 45824.4  | 22997.0 |
| N             | 78       | 8      | 20      | 33       | 17      |

Diese Ergebnisse zeigen, dass ein Zusammenhang zwischen dem Schweregrad der klinischen Zeichen und Symptome bei CHF und den Medianwerten der NT-proBNP-Konzentration besteht. Somit wurde auch bewiesen, dass die Dimension Vista®-PBNP-Methode zur Diagnose für CHF aller Schweregrade, einschließlich bei asymptomatischen Patienten, eingesetzt werden kann.

### Testauswertung

Die Receiver-Operator-Characteristics (ROC)-Kurve stellt die klinische Sensitivität und Spezifität bei verschiedenen Cutoffs für 269 Patienten, die mit CHF diagnostiziert wurden, und 318 Personen ohne CHF dar. Die ROC-Kurve für den Dimension® PBNP-Test ist unten abgebildet. Der Bereich unter der Kurve (AUK) für die Dimension Vista®-PBNP-Tests beträgt 0.928 mit einem 95%-Konfidenzintervall zwischen 0.907 und 0.949.

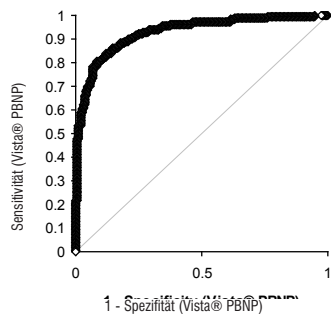

Im Folgenden finden Sie einen Boxplot der Population der klinischen Studie. Die empfohlenen klinischen Grenzwerte liegen bei 125 pg/ml für Patienten unter 75 Jahren und 450 pg/ml für Patienten ab 75 Jahren. Sechs Proben aus der Erkrankungsgruppe mit Werten oberhalb des Messbereichs sind in der Grafik nicht mit erfasst.

### Vista® PBNP-Werte für Referenz- und Erkrankungsgruppen

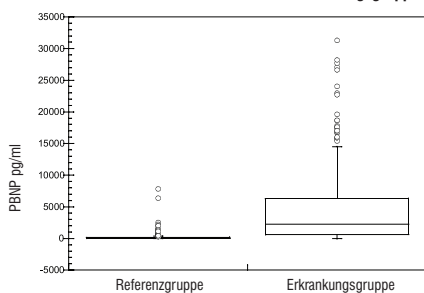

### Sensitivität und Spezifität im Vergleich mit Alter und Geschlecht

Die folgenden Tabellen zeigen die klinische Sensitivität und Spezifität des Dimension Vista® PBNP-Tests bei einem Cutoff von 125 pg/ml für Patienten unter 75 Jahren und von 450 pg/ml für Patienten ab 75 Jahren.

#### Männer

|                        | < 75 J.        | ≥ 75 Jahre   |
|------------------------|----------------|--------------|
| Sensitivität           | 94 % (133/142) | 96 % (47/49) |
| 95%-Konfidenzintervall | 90 – 98        | 90 – 100     |
| Spezifität             | 87 % (81/93)   | 73 % (45/62) |
| 95%-Konfidenzintervall | 80 – 94        | 61 – 84      |

#### Frauen

|                        | < 75 J.       | ≥ 75 Jahre   |
|------------------------|---------------|--------------|
| Sensitivität           | 89 % (54/61)  | 88 % (15/17) |
| 95%-Konfidenzintervall | 81 – 97       | 73 – 100     |
| Spezifität             | 92 % (95/103) | 85 % (51/60) |
| 95%-Konfidenzintervall | 87 – 97       | 76 – 94      |

### Altersangepasste ROC-Analyse

Eine altersangepasste ROC-Analyse der klinischen Daten wurde mit der gewichteten Methode durchgeführt, wie in Kondratovich (2002) beschrieben.<sup>28</sup> Die sich ergebende AUK beträgt 0.929 mit einem 95%-Konfidenzintervall von 0.909 bis 0.950.

## Spezifische Leistungsdaten

Die Daten stellen die typische Leistung des Dimension Vista®-Systems dar.

### Präzision<sup>29,c</sup>

| Material    | Mittelwert pg/ml | Standardabweichung (% VK) |                      |
|-------------|------------------|---------------------------|----------------------|
|             |                  | Wiederholbarkeit          | Innerhalb des Labors |
| Serumpool 1 | 120              | 1.72 (1.4)                | 2.06 (1.7)           |
| Serumpool 2 | 438              | 4.75 (1.1)                | 4.75 (1.1)           |
| Serumpool 3 | 880              | 9.05 (1.0)                | 12.24 (1.4)          |
| Serumpool 4 | 5075             | 69.06 (1.4)               | 91.97 (1.8)          |
| Interne QK  | 32633            | 763.39 (2.3)              | 1140.27 (3.5)        |

c. Zugrunde gelegt wurde CLSI/NCCLS EP5-A2. Zwanzig Tage lang wurden an jedem Testtag zwei separate Läufe mit zwei Testproben für jedes Testmaterial analysiert.

### Methodenvergleich<sup>30,d</sup>

#### Äquivalenz von Serum und Plasma

Ergebnisse der Vergleichstests auf dem Dimension Vista®-System für Lithium- und Natriumheparin- sowie EDTA-Plasmaproben im Vergleich zu Serumproben:

| Vergleichsprobe | Steigung | Achsabschnitt pg/ml | Korrelationskoeffizient | n  |
|-----------------|----------|---------------------|-------------------------|----|
| Lithiumheparin  | 1.01     | -2.0                | 0.9984                  | 53 |
| Na-Heparin      | 1.00     | 4.8                 | 0.9987                  | 57 |
| EDTA            | 1.00     | 0.5                 | 0.9997                  | 59 |

d. Die Modellgleichung für die Regression nach der Passing-Bablok-Methode lautet: [Ergebnis für Dimension Vista®-System] = Steigung x [Serumergebnisse] + Achsabschnitt.

### Regressionsstatistik<sup>e</sup>

| Vergleichsmethode                  | Steigung | Achsabschnitt pg/ml | Korrelationskoeffizient | n                |
|------------------------------------|----------|---------------------|-------------------------|------------------|
| Dimension Vista® PBNP (polyklonal) | 1.02     | -3.2                | 0.996                   | 160 <sup>f</sup> |

e. Es wurde CLSI/NCCLS EP9-A2 verwendet. Die Regressionsgerade wurde mit der Passing-Bablok-Methode angepasst.

f. Die in der Korrelationsstudie verwendeten 160 Werte lagen zwischen 12 und 29519 pg/ml.

### Spezifität

#### HIL-Interferenz

Das PBNP-Verfahren wurde nach CLSI/NCCLS EP7-A2 auf mögliche Interferenz durch Hämoglobin, Icterus und Lipämie (HIL) untersucht.<sup>31</sup> Die Abweichung berechnet sich aus dem Werteunterschied in Prozent zwischen der Kontrollprobe (ohne Störsubstanz) und der Testprobe (mit Störsubstanz). Als Interferenz gilt eine Abweichung von mehr als 10 %.

| Getestete Substanz       | Konzentration der Substanz        | NT-proBNP pg/ml | Abweichung* in % |
|--------------------------|-----------------------------------|-----------------|------------------|
| Hämoglobin (Hämolyt)     | Hämoglobin (monomer)              | 134             |                  |
|                          | 1000 mg/dl [1mmol/l] <sup>3</sup> | 2044            | < 10             |
| Bilirubin (unkonjugiert) | 60 mg/dl [1026 µmol/l]            | 132             |                  |
|                          |                                   | 2019            | < 10             |
| Bilirubin (konjugiert)   | 60 mg/dl [1026 µmol/l]            | 134             |                  |
|                          |                                   | 2066            | < 10             |
| Lipämie (Intralipid®)    | 3000 mg/dl [33.9 mmol/l]          | 131             |                  |
|                          |                                   | 2028            | < 10             |

Intralipid® ist eine eingetragene Marke der Fresenius Kabi AG, Bad Homburg, Deutschland.

\* Analysewerte dürfen nicht anhand dieser Abweichung korrigiert werden.

g. SI-Einheiten sind in Klammern angegeben.

### Nicht störende Substanzen

Die folgenden Substanzen haben keinen Einfluss auf PBNP-Testergebnisse, wenn sie in den genannten Konzentrationen im Serum vorhanden sind. Ungenauigkeiten (Abweichungen) aufgrund dieser Substanzen belaufen sich bei einer NT-proBNP-Konzentration zwischen 135 und 2000 pg/ml auf unter 10 %.

| Substanz             | Konzentration | SI-Einheiten |
|----------------------|---------------|--------------|
| Abciximab            | 21 µg/ml      | 441 µmol/l   |
| Acetaminophen        | 0.025 mg/dl   | 1.66 µmol/l  |
| Allopurinol          | 2.5 mg/dl     | 184 µmol/l   |
| Amikacin             | 15 mg/dl      | 256 µmol/l   |
| Amiodaron            | 20 µg/ml      | 31 µmol/l    |
| Amlodipinbesylat     | 4 µg/ml       | 7.1 µmol/l   |
| Ampicillin           | 5.3 mg/dl     | 152 µmol/l   |
| Ascorbinsäure        | 5 mg/dl       | 227 µmol/l   |
| Atenolol             | 1.0 mg/dl     | 37.6 µmol/l  |
| Atorvastatin         | 32 mg/dl      | 26.5 µmol/l  |
| Koffein              | 6 mg/dl       | 308 µmol/l   |
| Captopril            | 5.0 mg/dl     | 230 µmol/l   |
| Carbamazepin         | 3 mg/dl       | 127 µmol/l   |
| Chloramphenicol      | 5 mg/dl       | 155 µmol/l   |
| Chlordiazepoxid      | 1 mg/dl       | 33.3 µmol/l  |
| Chlorpromazin        | 0.2 mg/dl     | 6.27 µmol/l  |
| Cholesterin          | 500 mg/dl     | 12.9 mmol/l  |
| Cimetidin            | 2 mg/dl       | 79.2 µmol/l  |
| Cinnarizin           | 3.0 mg/dl     | 81.4 µmol/l  |
| Clopidogrel-Bisulfat | 30 µg/ml      | 71.4 µmol/l  |
| Kreatinin            | 30 mg/dl      | 2652 µmol/l  |
| Cyclosporin A        | 4000 ng/ml    | 3.3 µmol/l   |
| Dextran 40           | 6000 mg/dl    | 1500 µmol/l  |
| Diazepam             | 0.5 mg/dl     | 17.6 µmol/l  |
| Diclofenac           | 60 µg/ml      | 188.6 µmol/l |
| Digitoxin            | 60 ng/ml      | 78.6 nmol/l  |
| Digoxin              | 5 ng/ml       | 6.15 nmol/l  |
| Diltiazem            | 120 µg/ml     | 266.1 µmol/l |
| Dipyridamol          | 30 µg/ml      | 59.4 µmol/l  |



| Substanz               | Konzentration | SI-Einheiten  |
|------------------------|---------------|---------------|
| Disopyramid            | 40 µg/ml      | 117 µmol/l    |
| Dopamin                | 65 mg/dl      | 3.4 mmol/l    |
| Enalapril Maleat       | 16 µg/ml      | 32.5 µmol/l   |
| Erythromycin           | 6 mg/dl       | 81.6 µmol/l   |
| Ethanol                | 400 mg/dl     | 86.8 mmol/l   |
| Ethosuximid            | 25 mg/dl      | 1770 µmol/l   |
| Furosemid              | 6 mg/dl       | 181 µmol/l    |
| Gentamicin             | 12 mg/dl      | 251 µmol/l    |
| Heparin                | 3 U/ml        | 3000 U/l      |
| Hydralazin             | 20 µg/ml      | 101.7 µmol/l  |
| Hydrochlorothiazid     | 20 µg/ml      | 67.2 µmol/l   |
| Ibuprofen              | 50 mg/dl      | 2425 µmol/l   |
| Immunoglobulin G (IgG) | 5 g/dl        | 50 g/l        |
| Indomethacin           | 16 µg/ml      | 36.9 µmol/l   |
| Isosorbid-Dinitrat     | 6.0 mg/dl     | 254 µmol/l    |
| Lidocain               | 1.2 mg/dl     | 51.2 µmol/l   |
| Lisinopryl             | 16 µg/ml      | 36.2 µmol/l   |
| Lithium                | 2.3 mg/dl     | 3.2 mmol/l    |
| Lovastatin             | 16 µg/ml      | 39.6 µmol/l   |
| L-Thyroxin             | 60 µg/dl      | 0.77 µmol/l   |
| Methyldopa             | 2.5 mg/dl     | 118 µmol/l    |
| Milrinon-Laktat        | 2.4 µg/ml     | 11.4 µmol/l   |
| Nikotin                | 0.1 mg/dl     | 6.2 µmol/l    |
| Nifedipin              | 6.0 mg/dl     | 173 µmol/l    |
| Nitrofurantoin         | 40 µg/ml      | 168 µmol/l    |
| Nitroglyzerin          | 0.16 µg/ml    | 0.577 µmol/l  |
| Oxazepam               | 12 µg/ml      | 41.8 µmol/l   |
| Oxytetracyclin         | 100 µg/ml     | 217.2 µmol/l  |
| Penicillin G           | 25 U/ml       | 25000 U/l     |
| Pentobarbital          | 8 mg/dl       | 354 µmol/l    |
| Phenobarbital          | 10 mg/dl      | 431 µmol/l    |
| Phenytoin              | 5 mg/dl       | 198 µmol/l    |
| Primidon               | 4 mg/dl       | 183 µmol/l    |
| Probenecid             | 200 µg/ml     | 700.9 µmol/l  |
| Propoxyphen            | 0.2 mg/dl     | 4.91 µmol/l   |
| Propranolol            | 0.15 mg/dl    | 5.1 µmol/l    |
| Protein: Albumin       | 6 g/dl        | 60 g/l        |
| Gesamteiweiß           | 11.1 g/dl     | 111 g/l       |
| Chinidin               | 20 µg/ml      | 61.6 µmol/l   |
| Rheumafaktor           | 500 IU/ml     | 500 IU/ml     |
| Salicylsäure           | 60 mg/dl      | 4.34 mmol/l   |
| Simvastatin            | 32 µg/ml      | 76.5 µmol/l   |
| Sulfamethoxazol        | 320 µg/ml     | 1263.3 µmol/l |
| Theophyllin            | 4 mg/dl       | 222 µmol/l    |
| Trimethoprim           | 64 µg/ml      | 220.7 µmol/l  |
| Harnstoff              | 500 mg/dl     | 83.3 mmol/l   |
| Harnsäure              | 20 mg/dl      | 1190 µmol/l   |
| Valproinsäure          | 50 mg/dl      | 3467 µmol/l   |
| Verapamil              | 16 mg/dl      | 0.33 µmol/l   |
| Warfarin               | 4 µg/ml       | 130 µmol/l    |

#### Hook-Effekt

Ein-Schritt-Sandwich-Assays sind bei hohen Konzentrationen anfällig für den „Hook-Effekt“, bei dem ein Antigen-Überschuss die simultane Bindung der Bindungs- und Markierungsantikörper an ein einziges Analytmolekül verhindert.<sup>32</sup> Solche Proben müssen verdünnt und erneut analysiert werden, bevor die Ergebnisse weitergegeben werden. Die PBNP-Methode zeigt bis zu einer Konzentration von 400,000 pg/ml keinen Hook-Effekt.

#### Kreuzreaktivität

Die folgenden Substanzen weisen bei den angegebenen Konzentrationen keine bedeutende Kreuzreaktivität (weniger als 1 %) auf, wenn sie zu Proben mit 0 und etwa 125 pg/ml NT-proBNP hinzugefügt werden:

| Substanz                                                   | Konzentration |
|------------------------------------------------------------|---------------|
| ANP <sub>28</sub>                                          | 3.1 µg/ml     |
| NT-proANP <sub>1-30</sub> (preproANP <sub>26-55</sub> )    | 3.5 µg/ml     |
| NT-proANP <sub>31-67</sub> (preproANP <sub>56-92</sub> )   | 1.0 ng/ml     |
| NT-proANP <sub>79-98</sub> (preproANP <sub>104-123</sub> ) | 1.0 ng/ml     |
| BNP <sub>32</sub> (Natreacor®)                             | 3.5 µg/ml     |
| CNP <sub>32</sub>                                          | 2.2 µg/ml     |
| DNP                                                        | 1.0 ng/ml     |
| VNP                                                        | 1.0 ng/ml     |
| Adrenomedullin                                             | 1.0 ng/ml     |
| Aldosteron                                                 | 0.6 ng/ml     |
| Angiotensin I                                              | 0.6 ng/ml     |
| Angiotensin II                                             | 0.6 ng/ml     |

| Substanz        | Konzentration |
|-----------------|---------------|
| Angiotensin III | 1.0 ng/ml     |
| Endothelin      | 20 pg/ml      |
| Renin           | 50 ng/ml      |
| Urodilatin      | 3.5 µg/ml     |
| Arg-Vasopressin | 1.0 ng/ml     |

#### Analytische Sensitivität: ≤ 5 pg/ml

Die analytische Sensitivität der PBNP-Methode beträgt ≤ 5 pg/ml. Die analytische Sensitivität ist definiert als die Konzentration bei zwei Standardabweichungen (n = 20) über dem Wert einer Probe ohne NT-proBNP, wie z. B. dem PBNP-Kalibrator Level 1 (0 pg/ml).

#### Nachweisgrenze: 0.8 pg/ml

Die Nachweisgrenze für den ANALYTEN wurde anhand der CLSI-Richtlinie EP-17-A berechnet und beträgt 0.8 pg/ml mit einem Anteil an falsch positiven (α) bzw. falsch negativen (β) Ergebnissen jeweils unter 5 %; basierend auf 60 Bestimmungen mit 5 Leerproben und 5 Proben mit bekannt niedrigen Konzentrationen. Die Nachweisgrenze stellt die niedrigste Konzentration dar, die von Null unterschieden werden kann.

#### Funktionelle Sensitivität: Untersuchung des VK-Grenzwerts von 20 %

Die funktionelle Sensitivität wurde durch Bestimmung der Gesamtpräzision von Serumproben mit natürlichem NT-proBNP ermittelt. Die Gesamtpräzision wurde im Rahmen einer ANOVA-Studie über zwanzig Tage anhand von täglichen Doppelbestimmungen gemessen. Die funktionelle Sensitivität/das Impräzisionsprofil für den Dimension Vista® PBNP-Test entspricht einem Variationskoeffizienten (VK) von 20 % bei einer NT-proBNP-Konzentration von ≤ 30 pg/ml.

#### Verdünnungslinearität

Eine Patientenplasmaprobe mit einer hohen NT-proBNP-Konzentration wurde auf verschiedene Werte im Messbereich verdünnt. Zusätzliche Plasmaproben wurden linear verdünnt, um die Verdünnungsgenauigkeit am unteren Ende des Messbereichs zu bestätigen. Alle Proben wurden mit Patientenplasma-Pools mit niedrigen Werten verdünnt. Die folgende Tabelle fasst die Ergebnisse dieser Studien zusammen:

|                             | Probe A  | Probe B  |
|-----------------------------|----------|----------|
| Startkonzentration (pg/ml)  | 41812    | 1266     |
| <b>Regressionsstatistik</b> |          |          |
| Steigung                    | 1.004    | 1.003    |
| Achsabschnitt               | -55.8    | -3.5     |
| Korrelationskoeffizient     | 0.999    | 0.999    |
| N                           | 5        | 5        |
| <b>% Wiederfindung</b>      |          |          |
| Mittelwert                  | 99.9     | 99.5     |
| Bereich                     | 98 – 101 | 98 – 100 |

Hergestellt unter Lizenz von Roche Diagnostics.

US 5786163 und ausländische Entsprechungen

US-Patentanmeldung: 09/890442 und ausländische Entsprechungen

**Symbolschlüssel:** Siehe Verzeichnis im Anhang.

**Literatur:** Siehe Verzeichnis im Anhang.

Dimension Vista®, LOCI®, Dimension® und Flex® sind Warenzeichen von Siemens Healthcare Diagnostics.

©2008 Siemens Healthcare Diagnostics

Alle Rechte vorbehalten.

## Dimension Vista® System

### Flex® reagent cartridge

### PBNP

Voir les sections ombrées : Informations mises à jour à partir de la version 2017-04.

Date d'édition 2017-10-17

#### Peptide natriurétique cérébral à N terminal

**Utilisation :** La méthode PBNP est un test de diagnostic *in vitro* pour la mesure quantitative du peptide natriurétique cérébral à N terminal (NT-proBNP) dans le plasma et le sérum humains sur le système Dimension Vista®. Les mesures du NT-proBNP sont utilisées chez les sujets soupçonnés de souffrir d'une insuffisance cardiaque congestive (ICC) afin de faciliter le diagnostic et l'évaluation de la gravité de la maladie. Le test est par ailleurs indiqué à des fins de stratification des risques chez les patients présentant un syndrome coronarien aigu et une insuffisance cardiaque.

**Résumé :** Un dysfonctionnement du ventricule gauche peut se manifester dans le cadre d'une maladie coronarienne, d'une hypertension artérielle, d'une valvulopathie ou d'une cardiomyopathie primaire. Si ce dysfonctionnement n'est pas traité et est évolutif, le risque de mortalité est élevé (dû à une mort cardiaque subite, par exemple).

L'insuffisance cardiaque chronique est un syndrome clinique causé par un dérèglement de la fonction de pompage du cœur. Selon les symptômes, la gravité de l'insuffisance cardiaque est classée en différents stades (I à IV) par la New York Heart Association (NYHA). Des tests cliniques et des procédures d'imagerie sont utilisés pour diagnostiquer un dysfonctionnement du ventricule gauche.<sup>1</sup>

L'importance des peptides natriurétiques dans le contrôle de la fonction du système cardiovasculaire a été établie. Des études préliminaires montrent que les peptides natriurétiques peuvent servir à diagnostiquer des problèmes cliniques associés à un dysfonctionnement du ventricule gauche.<sup>2</sup> Les peptides natriurétiques suivants sont identifiés dans la littérature : le peptide natriurétique atrial (ANP), le peptide natriurétique cérébral (BNP) et le peptide natriurétique de type C (CNP).<sup>3,4</sup>

L'ANP et le BNP ont des propriétés natriurétiques et diurétiques. En tant qu'antagonistes du système rénine-angiotensine-aldostérone, ils influencent l'équilibre des électrolytes et des fluides dans l'organisme.<sup>5,6</sup> Chez les sujets atteints d'un dysfonctionnement du ventricule gauche, les concentrations sériques et plasmatiques de BNP augmentent, tout comme les concentrations de la prohormone biologiquement inactive, le proBNP. Le proBNP est constitué de 108 acides aminés. Il est essentiellement sécrété par le ventricule gauche du cœur, un processus au cours duquel il est clivé en deux éléments : le BNP physiologiquement actif (77 – 108) et le proBNP à fragment N terminal (1 – 76).<sup>4</sup>

Des études montrent que le NT-proBNP peut être utilisé dans des applications diagnostiques et pronostiques.<sup>7 – 13</sup> La concentration de NT-proBNP dans le plasma indique le pronostic de dysfonctionnement du ventricule gauche. Elle est également utile pour établir l'origine cardiaque ou non des symptômes.

La détermination du NT-proBNP contribue à identifier les sujets souffrant d'un dysfonctionnement du ventricule gauche. Des modifications de la concentration de NT-proBNP peuvent être utilisées pour évaluer la réussite du traitement chez des patients atteints d'un dysfonctionnement du ventricule gauche. Les fonctions du NT-proBNP tendent à indiquer qu'il pourrait être utilisé pour évaluer le remodelage vasculaire et contribuerait, par conséquent, à la mise en place de procédures de rééducation personnalisées.<sup>10,11</sup>

Fisher et al. ont constaté que les patients atteints d'une insuffisance cardiaque congestive et présentant des valeurs de NT-proBNP élevées affichaient un taux de mortalité à un an de 53 % contre 11 % pour les patients avec des valeurs moins élevées.<sup>12</sup> L'étude Gusto IV, à laquelle ont participé plus de 6800 patients, montre que le NT-proBNP est le facteur prédictif indépendant de la mortalité à un an le plus important chez les patients atteints d'un syndrome coronarien aigu.<sup>13</sup>

Dans ses lignes directrices, le groupe de travail pour le diagnostic et le traitement de l'insuffisance cardiaque chronique (Task Force for the Diagnosis and Treatment of Chronic Heart Failure) de la Société européenne de Cardiologie indique que les peptides natriurétiques, dont le NT-proBNP, « pourraient être des plus utiles, sur le plan clinique, en tant que test d'exclusion étant donné leurs valeurs prédictives négatives très élevées et constantes ».

Les patients souffrant d'un angor instable et après un infarctus du myocarde affichent des niveaux de NT-proBNP supérieurs.<sup>14,15</sup> Bien qu'elles n'aient pas de valeurs diagnostiques dans le cas de ces maladies, plusieurs études indiquent que les mesures de NT-proBNP fournissent des informations pronostiques sur la stratification des risques à court et long terme chez les patients souffrant d'un angor instable ou d'un infarctus du myocarde.<sup>15,16,17</sup>

**Principes de la méthode :** La méthode PBNP est un immunodosage chimiluminescent de type sandwich à une seule étape basé sur la technologie LOCI®. Les réactifs LOCI® comprennent deux réactifs à billes synthétiques et un fragment d'anticorps monoclonal biotinylé qui reconnaissent un épitope situé sur la partie N-terminale du proBNP. Le premier réactif à billes (Sensibeads) est recouvert de streptavidine et contient un colorant photosensible. Le deuxième réactif à billes (Chemibeads) est recouvert d'un deuxième anticorps spécifique d'un deuxième épitope indépendant du NT-proBNP et contient un colorant chimiluminescent. L'échantillon est incubé avec les Chemibeads et l'anticorps biotinylé pour former un sandwich particule/NT-proBNP/anticorps biotinylé. Les Sensibeads sont alors ajoutés et se lient à la biotine pour former un immunocomplexe agrégé avec des billes. L'illumination du complexe par une lumière à 680 nm génère de l'oxygène singulet à partir des Sensibeads, qui se diffuse dans les Chemibeads et déclenche une réaction de chimiluminescence. Le signal chimiluminescent obtenu, mesuré à 612 nm, est directement proportionnel à la concentration de NT-proBNP dans l'échantillon.<sup>18,19,20</sup>

#### Réactifs

| Puits <sup>a</sup> | Forme   | Composant                     | Concentration <sup>b</sup> | Source                      |
|--------------------|---------|-------------------------------|----------------------------|-----------------------------|
| 1 – 2              | Liquide | Anticorps biotinylé           | 8 µg/ml                    | Mouton, monoclonal          |
| 3 – 4              | Liquide | Chemibeads NT-proBNP          | 150 µg/ml                  | Mouton, monoclonal          |
| 7 – 8              | Liquide | Sensibeads avec streptavidine | 1400 µg/ml                 | <i>E. coli</i> recombinante |
| 9 – 12             | Liquide | Tampon de dosage              |                            |                             |

a. Les puits sont numérotés de manière consécutive à partir de l'extrémité large de la cartouche.

b. Valeur nominale par puits dans une cartouche.

#### Risque et sécurité :

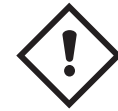

H317

P280, P272, P302 + P352, P333 + P313, P501

#### Avertissement

Peut provoquer une allergie cutanée.

Porter des gants de protection/des vêtements de protection/un équipement de protection des yeux/du visage. Les vêtements de travail contaminés ne devraient pas sortir du lieu de travail. EN CAS DE CONTACT AVEC LA PEAU: laver abondamment à l'eau et au savon. En cas d'irritation ou d'éruption cutanée: consulter un médecin. Éliminer les contenus et les contenants conformément à toutes les réglementations locales, régionales et nationales.

**Contient :** 5-chloro-2-méthyl-3(2h)-isothiazolone mixture with 2-méthyl-3(2h)-isothiazolone

Les fiches de sécurité sont disponibles sur [siemens.com/healthcare](http://siemens.com/healthcare)

**Précautions :** Les réacteurs LOCI® utilisés contiennent des liquides biologiques humains. Les manipuler avec soin pour éviter tout risque de contact avec la peau ou d'ingestion.

Pour diagnostic *in vitro*.

**Préparation des réactifs :** Tous les réactifs sont liquides et prêts à l'emploi.

**Conservation :** entre 2 et 8 °C

**Péremption :** Voir la date de péremption indiquée sur l'emballage de chaque cartouche de réactifs non ouverte. Les puits fermés sont stables sur l'instrument pendant 30 jours.

**Stabilité des puits ouverts :** 5 jours pour les puits 1 à 12

**Prélèvement et manipulation des échantillons :** Types d'échantillons recommandés : Sérum ou plasma (héparine-lithium, héparine-sodium et E.D.T.A.).

**Il n'est pas possible d'utiliser des échantillons et des contrôles stabilisés à l'aide d'azide.**

Le sérum et le plasma peuvent être prélevés au moyen des procédures recommandées de prélèvement d'échantillons sanguins pour diagnostic par ponction veineuse.<sup>21,22,23</sup> Chaque laboratoire doit établir un protocole de collecte/synchronisation des échantillons approprié.

Suivre les instructions d'utilisation et de traitement fournies avec le dispositif de collecte des échantillons.<sup>23</sup>

Une coagulation complète doit avoir lieu avant la centrifugation. Le sérum ou le plasma doit être physiquement séparé des cellules aussitôt que possible, au maximum deux heures après le prélèvement.<sup>24</sup> Les échantillons ne doivent pas contenir de particules.

Si un traitement thrombolytique ou anticoagulant allonge le temps de coagulation, l'utilisation d'échantillons de plasma permettra d'accélérer le traitement des échantillons et de réduire le risque d'interférence par des particules.<sup>21,24</sup>

Les échantillons sont stables pendant trois jours en cas de conservation à des températures de 20 à 25 °C ou de 2 à 8 °C ou pendant 12 mois en cas de congélation à -20 °C minimum.<sup>25</sup> Il convient d'éviter de soumettre les échantillons à des cycles répétés de congélation-décongélation.

Vérifier que les échantillons des patients, les calibrateurs et les contrôles sont équilibrés à température ambiante (22 à 28 °C) avant le test. Les échantillons contenant des précipités doivent être centrifugés avant le dosage.

#### Procédure

##### Matériel fourni

Cartouche de réactifs PBNP Flex®, N.° de ref. K6423A

##### Matériel requis mais non fourni

PBNP CAL, N.° de ref. KC676A

#### Produits de contrôle de qualité tels que :

- Contrôle MAS® CardiImmune® proBNP / MAS® CardiImmune® TL/XL MoniTrol Cardiac TL
- Contrôle CardiImmune® TL Liquid Assayed Cardiac Marker  
MAS® et CardiImmune® sont des marques déposées de Medical Analysis Systems, Inc. Camarillo, CA.
- Contrôles Bio-Rad Liquichek™ Cardiac Markers  
Liquichek™ est une marque commerciale de Bio-Rad Laboratories, Irvine, Californie 92618.
- Contrôle Audit™ MicroFD™ BNP Control  
Audit™ et MicroFD™ sont des marques commerciales de Audit™ MicroControls, Inc. Las Vegas, NV 89102.

#### Étapes du dosage

L'échantillonnage, la distribution des réactifs, le mélange et le traitement sont automatiquement réalisés par le système Dimension Vista®. Pour les détails du traitement, voir le guide de l'utilisateur du système Dimension Vista®.

#### Conditions du test

|                                                    |                   |
|----------------------------------------------------|-------------------|
| Volume d'échantillon (distribué dans le récipient) | 8 µl              |
| Volume de réactif Chemibead                        | 20 µl             |
| Volume de réactif d'anticorps biotinylé            | 20 µl             |
| Volume de Sensibeads                               | 15 µl             |
| Volume de tampon de dosage                         | 100 µl            |
| Température                                        | 37,0 °C           |
| Temps de réaction                                  | 10 minutes        |
| Longueur d'onde                                    | 680 et 612 nm     |
| Type de mesure                                     | Chimiluminescence |

## Étalonnage

|                                   |                                                                                                                                                                                                                                                                                                                                                                |
|-----------------------------------|----------------------------------------------------------------------------------------------------------------------------------------------------------------------------------------------------------------------------------------------------------------------------------------------------------------------------------------------------------------|
| Matériel d'étalonnage             | Calibrateur PBNP, N.° de ref. KC676A                                                                                                                                                                                                                                                                                                                           |
| Schéma d'étalonnage               | 5 niveaux, n = 3                                                                                                                                                                                                                                                                                                                                               |
| Unités                            | pg/ml                                                                                                                                                                                                                                                                                                                                                          |
| Niveaux d'étalonnage types        | Niveau 1 (calibrateur A) : 0 pg/ml<br>Niveau 2 (calibrateur B) : 250 pg/ml<br>Niveau 3 (calibrateur C) : 1500 pg/ml<br>Niveau 4 (calibrateur D) : 12000 pg/ml<br>Niveau 5 (calibrateur E) : 36750 pg/ml                                                                                                                                                        |
| Fréquence d'étalonnage            | Tous les 30 jours pour chaque lot<br>L'intervalle d'étalonnage peut être allongé si la vérification de l'étalonnage est acceptable.                                                                                                                                                                                                                            |
| Un nouvel étalonnage est requis : | <ul style="list-style-type: none"> <li>Pour chaque nouveau lot de cartouches de réactifs Flex®</li> <li>Après une maintenance ou une réparation majeure, en fonction des résultats du contrôle de qualité</li> <li>Comme indiqué dans les procédures de contrôle de qualité du laboratoire</li> <li>Selon les réglementations nationales en vigueur</li> </ul> |

## Contrôle de qualité

Analyser au moins une fois par jour d'utilisation, deux niveaux du matériel de contrôle qualité aux concentrations connues de NT-proBNP. Suivre les procédures de contrôle de qualité internes du laboratoire si les résultats obtenus ne sont pas compris dans les limites acceptables.

**Résultats :** L'instrument calcule la concentration de PBNP en pg/ml à l'aide du schéma de calcul décrit dans le guide de l'utilisateur du système Dimension Vista®.

**Les résultats de ce test doivent toujours être interprétés en rapport avec les antécédents médicaux du patient, les signes cliniques et autres constatations.**

## Intervalle de mesure analytique (IMA) : 5 – 35000 pg/ml

Il s'agit du domaine des valeurs d'analyte pouvant être mesurées directement dans l'échantillon sans dilution ni traitement préalable qui ne fasse pas partie de la méthode d'analyse usuelle et qui est équivalent au domaine de mesure.

- Les échantillons renvoyant des résultats supérieurs à 35000 pg/ml doivent être répétés à la dilution.  
Dilution manuelle : Diluer selon un rapport 1:5 dans de l'eau de qualité réactif pour obtenir des résultats compris dans le domaine communicable. Saisir le facteur de dilution sur l'instrument. Redoser. Le résultat lu tient compte de la dilution.  
Dilution automatique (DA) : L'instrument effectue une dilution au 1:5 sur le plateau des aliquotes mais continue d'utiliser l'échantillon normal de 8 µl pour les échantillons en dehors du domaine. Voir le guide de l'utilisateur du Dimension Vista®.
- Les échantillons renvoyant des résultats inférieurs à 5 pg/ml sont signalés comme « inférieurs à 5 pg/ml » par l'instrument.

## Limites de la procédure

Les concentrations de peptides natriurétiques peuvent être élevées chez les patients souffrant d'un infarctus aigu du myocarde, les patients candidats à une dialyse rénale et les patients ayant subi une dialyse rénale.

Les échantillons de patients peuvent contenir des anticorps hétérophiles susceptibles de réagir dans les immunodosages pour donner des résultats faussement élevés ou bas. Ce dosage a été conçu pour limiter l'interférence des anticorps hétérophiles. Toutefois, il est impossible de garantir l'élimination complète de ces interférences dans tous les échantillons de patients.

Un résultat de test qui n'est pas cohérent avec le tableau clinique et les antécédents du patient doit être interprété avec prudence.<sup>26,27</sup>

Le système de rapport de l'instrument renvoie des indicateurs et des commentaires qui fournissent à l'utilisateur des informations concernant les erreurs de traitement de l'instrument, les informations d'état de l'instrument et les erreurs potentielles dans les résultats relatifs au PBNP. Pour connaître la signification de ces indicateurs et commentaires, voir le guide de l'utilisateur du système Dimension Vista®. Tout rapport renvoyant des indicateurs et/ou des commentaires doit être traité en fonction du manuel des procédures du laboratoire et ne doit pas être rapporté.

Les échantillons contenant de la biotine à une concentration de 100 ng/ml présentent un changement de résultats inférieur ou égal à 10 %. Les concentrations de biotine supérieures à cela peuvent donner des résultats faussement bas pour les échantillons des patients.

Les résultats des patients prenant des compléments de biotine ou recevant un traitement de biotine à haute dose doivent être interprétés avec précaution en raison d'une interférence possible avec ce test.

## Répétabilité observée maximale

Les écarts types observés maximum attendus en termes de répétabilité (précision intra-séries) avec n = 5 réplicats aux concentrations d'analytes suivantes sont :

| Concentration de PBNP | ET maximum acceptable |
|-----------------------|-----------------------|
| 125 pg/ml             | 6.5 pg/ml             |
| 450 pg/ml             | 21.4 pg/ml            |

Un dysfonctionnement du système peut survenir si l'ET maximum acceptable est dépassé.

## Valeurs attendues

Les concentrations de NT-proBNP au sein du groupe de référence sont présentées dans les tableaux suivants. Chaque laboratoire doit établir son propre intervalle de référence pour la méthode PBNP, telle qu'elle sera exécutée sur le système Dimension Vista®. Les seuils de décision médicale recommandés, par tranche d'âge, sont les suivants :

Patients < 75 ans : 125 pg/ml

Patients ≥ 75 ans : 450 pg/ml

## Groupe d'étude de référence

Les concentrations de NT-proBNP ont été déterminées chez 318 individus ne présentant pas d'insuffisance cardiaque congestive (163 femmes et 155 hommes). Cette population comprenait des personnes apparemment en bonne santé et des sujets atteints de diabète, d'hypertension et de maladies pulmonaires. Les statistiques concernant les concentrations de NT-proBNP au sein du groupe d'étude de référence sont présentées dans le tableau suivant.

## Groupe d'étude de référence

| Tous          | < 55 ans | 55 – 64 ans | 65 – 74 ans | ≥ 75 ans |
|---------------|----------|-------------|-------------|----------|
| Moyenne       | 45.9     | 54.6        | 175.5       | 451.3    |
| ET            | 53.6     | 62.3        | 197.6       | 987.1    |
| Moyenne       | 27.2     | 28.8        | 106.2       | 173.5    |
| 95e centile   | 131.2    | 206.6       | 880.8       | 1615.7   |
| % < 125 pg/ml | 94 %     | 80 %        | 61 %        | -        |
| % < 450 pg/ml | -        | -           | -           | 79 %     |
| N             | 163      | 15          | 18          | 122      |

## Hommes

|               | < 55 ans | 55 – 64 ans | 65 – 74 ans | ≥ 75 ans |
|---------------|----------|-------------|-------------|----------|
| Moyenne       | 39.0     | 56.7        | 219.4       | 520.8    |
| ET            | 57.8     | 58.2        | 242.4       | 1080.9   |
| Moyenne       | 16.6     | 25.4        | 123.6       | 173.5    |
| 95e centile   | 168.8    | 154.7       | 880.8       | 1969.7   |
| % < 125 pg/ml | 93 %     | 83 %        | 55 %        | -        |
| % < 450 pg/ml | -        | -           | -           | 73 %     |
| N             | 76       | 6           | 11          | 62       |

## Femmes

|               | < 55 ans | 55 – 64 ans | 65 – 74 ans | ≥ 75 ans |
|---------------|----------|-------------|-------------|----------|
| Moyenne       | 51.9     | 53.2        | 106.6       | 379.5    |
| ET            | 49.2     | 68.3        | 60.8        | 883.1    |
| Moyenne       | 39.4     | 28.8        | 87.7        | 167.3    |
| 95e centile   | 124.0    | 206.6       | 215.2       | 1453.2   |
| % < 125 pg/ml | 95 %     | 78 %        | 71 %        | -        |
| % < 450 pg/ml | -        | -           | -           | 85 %     |
| N             | 87       | 9           | 7           | 60       |

## Groupe d'étude des maladies

Des échantillons sanguins ont été prélevés sur 269 patients souffrant d'une insuffisance cardiaque congestive (ICC) diagnostiquée. La population incluait 78 femmes et 191 hommes. Les statistiques descriptives et les classes fonctionnelles établies par la New York Heart Association (NYHA) sont présentées ci-dessous. Chaque laboratoire doit définir un intervalle de référence représentant la population de patients à évaluer. Les laboratoires doivent en outre connaître la pratique en vigueur dans leur établissement pour l'évaluation de l'ICC.

## Population atteinte d'ICC – Tous

|               | < 55 ans | 55 – 64 ans | 65 – 74 ans | ≥ 75 ans |
|---------------|----------|-------------|-------------|----------|
| Moyenne       | 6131.8   | 4455.5      | 6168.1      | 8142.7   |
| ET            | 13470.3  | 9296.0      | 10950.5     | 12699.1  |
| Moyenne       | 1550.9   | 1639.5      | 2541.3      | 3780.5   |
| 95e centile   | 28099.6  | 19481.5     | 17768.6     | 26923.1  |
| % > 125 pg/ml | 89 %     | 92 %        | 95 %        | -        |
| % > 450 pg/ml | -        | -           | -           | 94 %     |
| N             | 72       | 72          | 59          | 66       |

## Population atteinte d'ICC – Hommes

|               | < 55 ans | 55 – 64 ans | 65 – 74 ans | ≥ 75 ans |
|---------------|----------|-------------|-------------|----------|
| Moyenne       | 7771.4   | 4954        | 6537.2      | 8827.3   |
| ET            | 15797.2  | 10536.7     | 12383.9     | 12856.6  |
| Moyenne       | 2526.1   | 1699.8      | 2541.3      | 5529.2   |
| 95e centile   | 31237.1  | 19481.5     | 17768.6     | 18634.8  |
| % > 125 pg/ml | 94 %     | 94 %        | 93 %        | -        |
| % > 450 pg/ml | -        | -           | -           | 96 %     |
| N             | 48       | 51          | 43          | 49       |

## Population atteinte d'ICC – Femmes

|               | < 55 ans | 55 – 64 ans | 65 – 74 ans | ≥ 75 ans |
|---------------|----------|-------------|-------------|----------|
| Moyenne       | 2852.6   | 3244.9      | 5176.1      | 6169.7   |
| ET            | 5774.0   | 5200.7      | 5727.8      | 12397.4  |
| Moyenne       | 452.3    | 1516.9      | 2270.8      | 1125.3   |
| 95e centile   | 15569.3  | 7903.1      | 16889.9     | 45824.4  |
| % > 125 pg/ml | 79 %     | 86 %        | 100 %       | -        |
| % > 450 pg/ml | -        | -           | -           | 88 %     |
| N             | 24       | 21          | 16          | 17       |

## Population atteinte d'ICC – Tous

### Classe fonctionnelle de la NYHA

|             | Tous les sujets atteints d'ICC | NYHA I  | NYHA II | NYHA III | NYHA IV |
|-------------|--------------------------------|---------|---------|----------|---------|
| Moyenne     | 6184.5                         | 3941.9  | 3648.8  | 6643.1   | 11089.2 |
| ET          | 11737.8                        | 8461.3  | 4897.0  | 13567.0  | 14428.2 |
| Moyenne     | 2282.2                         | 1161.0  | 1091.7  | 2541.3   | 4537.7  |
| 5e centile  | 101.1                          | 100.4   | 46.6    | 143.1    | 74.6    |
| 95e centile | 22331.9                        | 14184.1 | 14238.5 | 17497.1  | 28099.6 |
| % > seuil   | 92 %                           | 93 %    | 90 %    | 94 %     | 88 %    |
| Minimum     | 5.1                            | 52.8    | 24.5    | 5.1      | 39.6    |
| Maximum     | 91446.4                        | 52327.0 | 18634.8 | 91446.4  | 78045.2 |
| N           | 269                            | 45      | 60      | 124      | 40      |

## Population atteinte d'ICC – Hommes

| Classe fonctionnelle de la NYHA |                                |         |         |          |         |
|---------------------------------|--------------------------------|---------|---------|----------|---------|
|                                 | Tous les sujets atteints d'ICC | NYHA I  | NYHA II | NYHA III | NYHA IV |
| Moyenne                         | 7012.1                         | 4567.5  | 4402.2  | 7298.4   | 14351.2 |
| ET                              | 12991.9                        | 9204.3  | 5167.4  | 14789.5  | 17258.9 |
| Moyenne                         | 3162.6                         | 1639.5  | 2230.9  | 3442.2   | 6015.9  |
| 5e centile                      | 126.1                          | 136.3   | 46.5    | 126.1    | 101.1   |
| 95e centile                     | 24004.7                        | 19481.5 | 14238.5 | 17497.1  | 31237.1 |
| % > seuil                       | 94 %                           | 97 %    | 93 %    | 95 %     | 91 %    |
| Minimum                         | 5.1                            | 72.5    | 44.7    | 5.1      | 74.6    |
| Maximum                         | 91446.4                        | 52327.0 | 18634.8 | 91446.4  | 78045.2 |
| N                               | 191                            | 37      | 40      | 91       | 23      |

## Population atteinte d'ICC – Femmes

| Classe fonctionnelle de la NYHA |                                |        |         |          |         |
|---------------------------------|--------------------------------|--------|---------|----------|---------|
|                                 | Tous les sujets atteints d'ICC | NYHA I | NYHA II | NYHA III | NYHA IV |
| Moyenne                         | 4157.8                         | 1048.3 | 2142.1  | 4836.0   | 6676.0  |
| ET                              | 7561.7                         | 1636.1 | 4008.9  | 9366.5   | 7864.9  |
| Moyenne                         | 950.2                          | 225.4  | 705.3   | 1286.7   | 3780.5  |
| 5e centile                      | 84.3                           | 52.8   | 24.5    | 143.1    | 39.6    |
| 95e centile                     | 22331.9                        | 4960.2 | 11020.8 | 26923.1  | 22997.0 |
| % > seuil                       | 87 %                           | 75 %   | 85 %    | 94 %     | 82 %    |
| Minimum                         | 24.5                           | 52.8   | 24.5    | 126.8    | 39.6    |
| Maximum                         | 45824.4                        | 4960.2 | 15893.8 | 45824.4  | 22997.0 |
| N                               | 78                             | 8      | 20      | 33       | 17      |

Ces résultats montrent l'existence d'un lien entre la gravité des signes et symptômes cliniques d'une ICC et la concentration moyenne de NT-proBNP, ce qui démontre que la méthode Dimension Vista® PBNP peut servir d'aide au diagnostic de tous les degrés de gravité de l'ICC, y compris chez les patients asymptomatiques.

### Interprétation des résultats

La courbe ROC (Receiver Operator Characteristics) présente la sensibilité et la spécificité cliniques à des seuils divers pour les 269 patients avec diagnostic confirmé d'ICC et 318 sujets sans ICC. La courbe ROC pour le dosage Dimension Vista® PBNP est illustrée ci-dessous. L'aire située sous la courbe ROC (AUC) pour le dosage Dimension Vista® PBNP est de 0.928 avec un intervalle de confiance à 95 % compris entre 0.907 et 0.949.

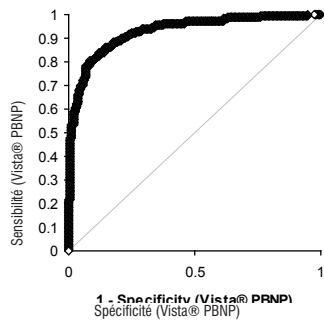

Un diagramme en « boîte à moustaches » de la population de revue clinique est présenté ci-dessous. Les seuils cliniques recommandés sont de 125 pg/ml pour les patients de moins de 75 ans et de 450 pg/ml pour ceux de 75 ans et plus. Six échantillons du groupe de maladies affichant des valeurs supérieures au domaine de mesure ne sont pas présentés dans le diagramme.

### Valeurs Vista® PBNP des groupes de référence et de maladies

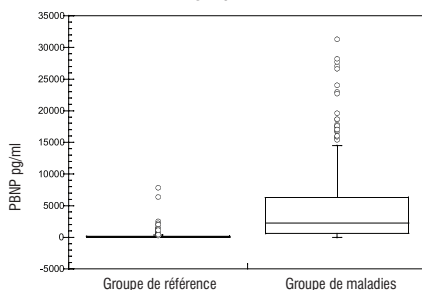

### Sensibilité et spécificité en fonction de l'âge et du sexe

Les tableaux ci-dessous montrent la sensibilité et la spécificité cliniques du dosage Dimension Vista® PBNP avec un seuil de 125 pg/ml pour les patients de moins de 75 ans et de 450 pg/ml pour ceux de 75 ans ou plus.

#### Hommes

|                                | < 75 ans       | ≥ 75 ans     |
|--------------------------------|----------------|--------------|
| Sensibilité                    | 94 % (133/142) | 96 % (47/49) |
| Intervalle de confiance à 95 % | 90 – 98        | 90 – 100     |
| Spécificité                    | 87 % (81/93)   | 73 % (45/62) |
| Intervalle de confiance à 95 % | 80 – 94        | 61 – 84      |

#### Femmes

|                                | < 75 ans      | ≥ 75 ans     |
|--------------------------------|---------------|--------------|
| Sensibilité                    | 89 % (54/61)  | 88 % (15/17) |
| Intervalle de confiance à 95 % | 81 – 97       | 73 – 100     |
| Spécificité                    | 92 % (95/103) | 85 % (51/60) |
| Intervalle de confiance à 95 % | 87 – 97       | 76 – 94      |

## Analyse ROC pour âge identique

Une analyse ROC pour âge identique des données cliniques a été réalisée à l'aide de la méthode pondérée décrite par Kondratovich (2002).<sup>28</sup> L'AUC obtenue était de 0.929 avec un intervalle de confiance à 95 % compris entre 0.909 et 0.950.

### Caractéristiques spécifiques de performance

Les données suivantes représentent la performance type du système Dimension Vista®.

#### Précision<sup>29,c</sup>

| Matériel        | Moyenne pg/ml | Écart type (CV %) |                   |
|-----------------|---------------|-------------------|-------------------|
|                 |               | Répétabilité      | Intra-laboratoire |
| Pool de sérum 1 | 120           | 1.72 (1.4)        | 2.06 (1.7)        |
| Pool de sérum 2 | 438           | 4.75 (1.1)        | 4.75 (1.1)        |
| Pool de sérum 3 | 880           | 9.05 (1.0)        | 12.24 (1.4)       |
| Pool de sérum 4 | 5075          | 69.06 (1.4)       | 91.97 (1.8)       |
| CQ interne      | 32633         | 763.39 (2.3)      | 1140.27 (3.5)     |

c. La directive EP5-A2 du CLSI/NCCLS a été utilisée. Chaque jour de test, deux dosages séparés, avec deux échantillons de test pour chaque matériel de test, ont été effectués pendant 20 jours.

#### Comparaison de méthode<sup>30,d</sup>

##### Équivalence sérum et plasma

Une comparaison des résultats des tests sur le système Dimension Vista® pour les échantillons de plasma héparine-lithium, héparine-sodium et EDTA par rapport aux échantillons sériques est présentée ci-dessous :

| Échantillon comparatif | Pente | Ordonnée à l'origine pg/ml | Coefficient de corrélation | n  |
|------------------------|-------|----------------------------|----------------------------|----|
| Héparine Li            | 1.01  | -2.0                       | 0.9984                     | 53 |
| Héparine Na            | 1.00  | 4.8                        | 0.9987                     | 57 |
| EDTA                   | 1.00  | 0.5                        | 0.9997                     | 59 |

d. L'équation par régression de Passing-Bablok est la suivante : [résultats du système Dimension Vista®] = pente x [résultats pour le sérum] + ordonnée à l'origine.

#### Statistiques de régression<sup>e</sup>

| Méthode comparative                | Pente | Ordonnée à l'origine pg/ml | Coefficient de corrélation | n                |
|------------------------------------|-------|----------------------------|----------------------------|------------------|
| Dimension Vista® PBNP (polyclonal) | 1.02  | -3.2                       | 0.996                      | 160 <sup>f</sup> |

e. La directive EP9-A2 du CLSI/NCCLS a été utilisée. La ligne de régression a été ajustée à l'aide de la méthode de Passing-Bablok.

f. Les 160 valeurs de l'étude de corrélation s'échelonnaient de 12 à 29519 pg/ml.

### Spécificité

#### Interférence HIL

Les interférences HIL (hémoglobine, ictere et lipémie) générées par la méthode PBNP ont été évaluées d'après le document EP7-A2 du CLSI/NCCLS.<sup>31</sup> Le biais est la différence de résultats entre l'échantillon de contrôle (sans la substance interférente) et l'échantillon de test (avec la substance interférente) exprimée en pourcentage. Un biais supérieur à 10 % est considéré comme une interférence.

| Substance testée        | Concentration de la substance    | NT-proBNP pg/ml | Biais % |
|-------------------------|----------------------------------|-----------------|---------|
| Hémoglobine (hémolysat) | Hémoglobine (monomère)           | 134             |         |
|                         | 1000 mg/dl [mmol/l] <sup>g</sup> | 2044            | < 10    |
| Bilirubine (indirecte)  | 60 mg/dl [1026 µmol/l]           | 132             |         |
|                         |                                  | 2019            | < 10    |
| Bilirubine (directe)    | 60 mg/dl [1026 µmol/l]           | 134             |         |
|                         |                                  | 2066            | < 10    |
| Lipémie (Intralipid®)   | 3000 mg/dl [33.9 mmol/l]         | 131             |         |
|                         |                                  | 2028            | < 10    |

Intralipid® est une marque déposée de Fresenius Kabi AG, Bad Homburg, Allemagne.

\* Les résultats de l'analyte ne doivent pas être corrigés en fonction du biais.

g. Les unités SI (Système International d'Unités) sont indiquées entre crochets.

#### Substances non interférentes

Les substances suivantes n'interfèrent pas avec la méthode PBNP lorsqu'elles sont présentes dans le sérum aux concentrations indiquées. Les imprécisions (biases) dues à ces substances sont inférieures à 10 % à une concentration de NT-proBNP de 135 et 2000 pg/ml.

| Composé                  | Concentration | Unités SI    |
|--------------------------|---------------|--------------|
| Abciximab                | 21 µg/ml      | 441 µmol/l   |
| Acétaminophène           | 0.025 mg/dl   | 1.66 µmol/l  |
| Allopurinol              | 2.5 mg/dl     | 184 µmol/l   |
| Amikacine                | 15 mg/dl      | 256 µmol/l   |
| Amiodarone               | 20 µg/ml      | 31 µmol/l    |
| Bésylate d'amiodipine    | 4 µg/ml       | 7.1 µmol/l   |
| Ampicilline              | 5.3 mg/dl     | 152 µmol/l   |
| Acide ascorbique         | 5 mg/dl       | 227 µmol/l   |
| Aténolol                 | 1.0 mg/dl     | 37.6 µmol/l  |
| Atorvastatine            | 32 mg/dl      | 26.5 µmol/l  |
| Caféine                  | 6 mg/dl       | 308 µmol/l   |
| Captopril                | 5.0 mg/dl     | 230 µmol/l   |
| Carbamazépine            | 3 mg/dl       | 127 µmol/l   |
| Chloramphénicol          | 5 mg/dl       | 155 µmol/l   |
| Chlordiazépoxide         | 1 mg/dl       | 33.3 µmol/l  |
| Chlorpromazine           | 0.2 mg/dl     | 6.27 µmol/l  |
| Cholestérol              | 500 mg/dl     | 12.9 mmol/l  |
| Cimétidine               | 2 mg/dl       | 79.2 µmol/l  |
| Cinnarizine              | 3.0 mg/dl     | 81.4 µmol/l  |
| Bisulfate de clopidogrel | 30 µg/ml      | 71.4 µmol/l  |
| Créatinine               | 30 mg/dl      | 2652 µmol/l  |
| Cyclosporine A           | 4000 ng/ml    | 3.3 µmol/l   |
| Dextran 40               | 6000 mg/dl    | 1500 µmol/l  |
| Diazépam                 | 0.5 mg/dl     | 17.6 µmol/l  |
| Diclofenac               | 60 µg/ml      | 188.6 µmol/l |

| Composé                 | Concentration | Unités SI     |
|-------------------------|---------------|---------------|
| Digitoxine              | 60 ng/ml      | 78.6 nmol/l   |
| Digoxine                | 5 ng/ml       | 6.15 nmol/l   |
| Diltiazem               | 120 µg/ml     | 266.1 µmol/l  |
| Dipyridamole            | 30 µg/ml      | 59.4 µmol/l   |
| Disopyramide            | 40 µg/ml      | 117 µmol/l    |
| Dopamine                | 65 mg/dl      | 3.4 mmol/l    |
| Maléate d'énalapril     | 16 µg/ml      | 32.5 µmol/l   |
| Érythromycine           | 6 mg/dl       | 81.6 µmol/l   |
| Éthanol                 | 400 mg/dl     | 86.8 mmol/l   |
| Éthosuximide            | 25 mg/dl      | 1770 µmol/l   |
| Furosémide              | 6 mg/dl       | 181 µmol/l    |
| Gentamicine             | 12 mg/dl      | 251 µmol/l    |
| Héparine                | 3 U/ml        | 3000 U/l      |
| Hydralazine             | 20 µg/ml      | 101.7 µmol/l  |
| Hydrochlorothiazide     | 20 µg/ml      | 67.2 µmol/l   |
| Ibuprofène              | 50 mg/dl      | 2425 µmol/l   |
| Immunoglobuline G (IgG) | 5 g/dl        | 50 g/l        |
| Indométhacine           | 16 µg/ml      | 36.9 µmol/l   |
| Dinitrate d'isosorbide  | 6.0 mg/dl     | 254 µmol/l    |
| Lidocaïne               | 1.2 mg/dl     | 51.2 µmol/l   |
| Lisinopryl              | 16 µg/ml      | 36.2 µmol/l   |
| Lithium                 | 2.3 mg/dl     | 3.2 mmol/l    |
| Lovastatine             | 16 µg/ml      | 39.6 µmol/l   |
| L-thyroxine             | 60 µg/dl      | 0.77 µmol/l   |
| Méthildopa              | 2.5 mg/dl     | 118 µmol/l    |
| Lactate de milrinone    | 2.4 µg/ml     | 11.4 µmol/l   |
| Nicotine                | 0.1 mg/dl     | 6.2 µmol/l    |
| Nifédipine              | 6.0 mg/dl     | 173 µmol/l    |
| Nitrofurantoïne         | 40 µg/ml      | 168 µmol/l    |
| Nitroglycérine          | 0.16 µg/ml    | 0.577 µmol/l  |
| Oxazepam                | 12 µg/ml      | 41.8 µmol/l   |
| Oxytétracycline         | 100 µg/ml     | 217.2 µmol/l  |
| Pénicilline G           | 25 U/ml       | 25000 U/l     |
| Pentobarbital           | 8 mg/dl       | 354 µmol/l    |
| Phénobarbital           | 10 mg/dl      | 431 µmol/l    |
| Phénytoïne              | 5 mg/dl       | 198 µmol/l    |
| Primidone               | 4 mg/dl       | 183 µmol/l    |
| Probénécide             | 200 µg/ml     | 700.9 µmol/l  |
| Propoxyphène            | 0.2 mg/dl     | 4.91 µmol/l   |
| Propranolol             | 0.15 mg/dl    | 5.1 µmol/l    |
| Protéine : Albumine     | 6 g/dl        | 60 g/l        |
| Protéine : Totale       | 11.1 g/dl     | 111 g/l       |
| Quinidine               | 20 µg/ml      | 61.6 µmol/l   |
| Facteur rhumatoïde      | 500 IU/ml     | 500 IU/ml     |
| Acide salicylique       | 60 mg/dl      | 4.34 mmol/l   |
| Simvastatine            | 32 µg/ml      | 76.5 µmol/l   |
| Sulfaméthoxazole        | 320 µg/ml     | 1263.3 µmol/l |
| Théophylline            | 4 mg/dl       | 222 µmol/l    |
| Triméthoprime           | 64 µg/ml      | 220.7 µmol/l  |
| Urée                    | 500 mg/dl     | 83.3 mmol/l   |
| Acide urique            | 20 mg/dl      | 1190 µmol/l   |
| Acide valproïque        | 50 mg/dl      | 3467 µmol/l   |
| Vérapamil               | 16 mg/dl      | 0.33 µmol/l   |
| Warfarine               | 4 µg/ml       | 130 µmol/l    |

#### Effet crochet

Les immunodosages de type sandwich à une seule étape sont sensibles à un « effet crochet » haute dose, où un excès d'antigène empêche la liaison simultanée des anticorps de capture et de détection avec une molécule d'analyte unique.<sup>32</sup> Ces échantillons doivent être dilués et redosés avant communication des résultats. La méthode PBNP n'entraîne aucun effet crochet jusqu'à 400,000 pg/ml.

#### Réactivité croisée

Les substances suivantes ne présentent aucune réactivité croisée significative (inférieure à 1 %) aux concentrations indiquées en cas d'ajout à des échantillons contenant 0 et environ 125 pg/ml de NT-proBNP :

| Substance                                                  | Concentration |
|------------------------------------------------------------|---------------|
| ANP <sub>28</sub>                                          | 3.1 µg/ml     |
| NT-proANP <sub>1-30</sub> (preproANP <sub>28-55</sub> )    | 3.5 µg/ml     |
| NT-proANP <sub>31-67</sub> (preproANP <sub>56-92</sub> )   | 1.0 ng/ml     |
| NT-proANP <sub>79-98</sub> (preproANP <sub>104-123</sub> ) | 1.0 ng/ml     |
| BNP <sub>32</sub> (Natrecor®)                              | 3.5 µg/ml     |
| CNP <sub>32</sub>                                          | 2.2 µg/ml     |
| DNP                                                        | 1.0 ng/ml     |
| VNP                                                        | 1.0 ng/ml     |
| Adrénomédulline                                            | 1.0 ng/ml     |
| Aldostérone                                                | 0.6 ng/ml     |
| Angiotensine I                                             | 0.6 ng/ml     |
| Angiotensine II                                            | 0.6 ng/ml     |
| Angiotensine III                                           | 1.0 ng/ml     |
| Endothéline                                                | 20 pg/ml      |
| Rénine                                                     | 50 ng/ml      |
| Urodilatine                                                | 3.5 µg/ml     |
| Arg-Vasopressine                                           | 1.0 ng/ml     |

#### Sensibilité analytique : ≤ 5 pg/ml

La sensibilité analytique de la méthode PBNP est de ≤ 5 pg/ml. La sensibilité analytique est définie comme la concentration à deux écarts types (n = 20) au-dessus d'un échantillon dépourvu de NT-proBNP, tel que le calibrateur PBNP de niveau 1 (0 pg/ml).

#### Limite de détection : 0.8 pg/ml

La limite de détection (LdD), pour l'ANALYTE, est de 0.8 pg/ml, déterminée conformément à la directive EP17-A du CLSI et avec une proportion de faux positifs (α) inférieure à 5 % et de faux négatifs (β) inférieure à 5 % ; sur la base de 60 déterminations, avec 5 échantillons blancs et 5 échantillons bas. La LdD est la plus faible concentration pouvant être détectée de façon fiable.

#### Sensibilité fonctionnelle : évaluation de la limite du CV de 20 %

La sensibilité fonctionnelle a été évaluée en déterminant l'imprécision totale des échantillons sériques de NT-proBNP naturel. L'imprécision totale a été mesurée dans le cadre d'une étude ANOVA de vingt jours à raison de deux réplicats par jour. Le profil de sensibilité fonctionnelle/imprécision de la méthode Dimension Vista® PBNP correspond à un coefficient de variation (CV) de 20 % pour un niveau de NT-proBNP de ≤ 30 pg/ml.

#### Linéarité par dilution

Un échantillon de plasma d'un patient présentant une forte concentration de NT-proBNP a été dilué sur tout le domaine de mesure. Des échantillons supplémentaires de plasma ont été dilués linéairement pour confirmer la précision de la dilution à la limite basse du domaine de mesure. Tous les échantillons ont été dilués avec des pools de plasma de patients bas. Le tableau suivant résume les résultats de ces études :

|                                   | Échantillon A | Échantillon B |
|-----------------------------------|---------------|---------------|
| Concentration de départ (pg/ml)   | 41812         | 1266          |
| <b>Statistiques de régression</b> |               |               |
| Pente                             | 1.004         | 1.003         |
| Ordonnée à l'origine              | -55.8         | -3.5          |
| Coefficient de corrélation        | 0.999         | 0.999         |
| N                                 | 5             | 5             |
| <b>% de récupération</b>          |               |               |
| Moyenne                           | 99.9          | 99.5          |
| Domaine                           | 98 – 101      | 98 – 100      |

Fabriqué sous licence de Roche Diagnostics.

Brevet américain 5786163 et équivalents étrangers

Demande de brevet américain : brevet américain 09/890442 et équivalents étrangers

**Explication des symboles :** Voir le panneau ci-contre.

**Bibliographie :** Voir le panneau ci-contre.

Dimension Vista®, LOCI®, Dimension® et Flex® sont des marques commerciales de Siemens Healthcare Diagnostics.

©2008 Siemens Healthcare Diagnostics

Tous droits réservés.

## Dimension Vista® System

### Flex® reagent cartridge

### PBNP

Vedere le sezioni ombreggiate: informazioni aggiornate dalla versione 2017-04.

Data di edizione 2017-10-17

#### N terminale del peptide natriuretico cerebrale

**Uso previsto:** Il metodo PBNP è un test diagnostico *in vitro* per la determinazione quantitativa del N terminale del peptide natriuretico cerebrale (NT-proBNP) nel siero e nel plasma umani sul sistema Dimension Vista®. In soggetti con sospetta insufficienza cardiaca congestizia, le determinazioni di NT-proBNP vengono utilizzate come ausilio nella diagnosi e nella valutazione della gravità. Il test è anche indicato per la stratificazione del rischio in pazienti affetti da sindrome coronarica acuta e da insufficienza cardiaca.

**Riepilogo:** In corso di coronaropatia, ipertensione arteriosa, valvulopatia o miocardiopatia primaria può verificarsi una disfunzione ventricolare sinistra. Se la disfunzione non viene trattata ed è progressiva, vi è un'alta probabilità di decesso, ad esempio come conseguenza di morte cardiaca improvvisa.

L'insufficienza cardiaca cronica è una sindrome clinica provocata dall'indebolimento della funzionalità della pompa cardiaca. In base ai sintomi, la gravità dell'insufficienza cardiaca viene classificata in stadi da I a IV dalla New York Heart Association (NYHA). Per la diagnosi di disfunzione ventricolare sinistra vengono utilizzati test clinici e procedure di imaging.<sup>1</sup>

L'importanza dei peptidi natriuretici nel controllo della funzionalità del sistema cardiovascolare è stata comprovata. I primi studi effettuati rivelano che è possibile utilizzare i peptidi natriuretici per la diagnosi dei problemi clinici associati alla disfunzione ventricolare sinistra.<sup>2</sup> In letteratura sono noti i seguenti peptidi natriuretici: peptide natriuretico atriale (ANP), peptide natriuretico cerebrale di tipo B (BNP) e peptide natriuretico di tipo C (CNP).<sup>3,4</sup>

I peptidi ANP e BNP hanno proprietà natriuretiche e diuretiche. In qualità di antagonisti del sistema renina-angiotensina-aldosterone, questi peptidi influenzano l'equilibrio di elettroliti e fluidi nell'organismo.<sup>5,6</sup> Nei soggetti affetti da disfunzione ventricolare sinistra, le concentrazioni di BNP nel siero e nel plasma aumentano, così come aumentano anche le concentrazioni del pro-ormone biologicamente inattivo, proBNP. Il proBNP consiste di 108 aminoacidi. Viene secreto principalmente dal ventricolo sinistro del cuore e, in questo processo, viene suddiviso in BNP fisiologicamente attivo (77 – 108) e nel frammento N-terminale di proBNP (1 – 76).<sup>4</sup>

Alcuni studi indicano che è possibile utilizzare il frammento NT-proBNP a fini diagnostici e prognostici.<sup>7 – 13</sup> La concentrazione di NT-proBNP nel plasma rappresenta un indicatore della prognosi di disfunzione ventricolare sinistra. È anche utile nell'attribuzione della sintomatologia a cause cardiache o non-cardiache.

La determinazione del NT-proBNP è di ausilio nell'identificazione dei soggetti affetti da disfunzione ventricolare sinistra. È possibile utilizzare variazioni nella concentrazione di NT-proBNP per la valutazione del successo del trattamento nei pazienti affetti da disfunzione ventricolare sinistra. Ci sono indicazioni in base alle quali il frammento NT-proBNP, grazie alle sue funzioni, risulta idoneo per la valutazione del rimodellamento vascolare, contribuendo in questo modo alla creazione di programmi di riabilitazione personalizzati.<sup>10,11</sup>

Fisher et al. hanno rilevato che i pazienti affetti da insufficienza cardiaca congestizia con valori elevati di NT-proBNP presentavano un indice di mortalità a un anno pari al 53% rispetto all'11% dei pazienti con valori inferiori.<sup>12</sup> Lo studio Gusto IV, che ha coinvolto oltre 6800 pazienti, ha riconosciuto nel frammento NT-proBNP il principale indicatore indipendente di mortalità a un anno in pazienti affetti da sindrome coronarica acuta.<sup>13</sup>

La European Society of Cardiology Task Force for the Diagnosis and Treatment of Chronic Heart Failure (Task Force della Società Europea di Cardiologia sulla diagnosi e la cura dell'insufficienza cardiaca cronica) sostiene nelle proprie linee guida che i peptidi natriuretici, incluso il NT-proBNP, "possono rivelarsi più utili dal punto di vista clinico come test di esclusione a causa di valori predittivi negativi molto alti e uniformi".

I livelli circolanti di NT-proBNP aumentano nei pazienti affetti da angina instabile e a seguito di infarto del miocardio.<sup>14,15</sup> Sebbene non patognomonici, numerosi studi hanno indicato come i valori di NT-proBNP forniscano informazioni prognostiche per la stratificazione del rischio a breve e a lungo termine in pazienti affetti da angina instabile o infarto del miocardio.<sup>15,16,17</sup>

**Principi del metodo:** Il metodo PBNP è un immunodosaggio chemiluminescente "a sandwich" monofase basato sulla tecnologia LOCI®. I reagenti LOCI® comprendono due reagenti sintetici a granuli e un frammento di anticorpo monoclonale biotinilato che riconoscono un epitopo collocato nella parte N-terminale di proBNP. Il primo reagente in microsfere (Sensibead) è rivestito con streptavidina e contiene un colorante fotosensibile. Il secondo reagente in microsfere (Chemibead) è rivestito con un secondo anticorpo specifico per un secondo epitopo indipendente su NT-proBNP e contiene un colorante chemiluminescente. Il campione viene incubato con Chemibead e l'anticorpo biotinilato per formare dei sandwich di particella/NT-proBNP/anticorpi biotinilati. Vengono quindi aggiunti i Sensibead, i quali si legano alla biotina formando immunocomplessi di microsfere aggregate. L'illuminazione del complesso mediante luce a 680 nm genera ossigeno singoletto dai Sensibead che si diffonde ai Chemibead attivando una reazione chemiluminescente. Il segnale chemiluminescente che ne deriva viene misurato a 612 nm ed è direttamente proporzionale alla concentrazione di NT-proBNP nel campione.<sup>18,19,20</sup>

#### Reagenti

| Pozzetti <sup>a</sup> | Forma   | Componente              | Concentrazione <sup>b</sup> | Origine                     |
|-----------------------|---------|-------------------------|-----------------------------|-----------------------------|
| 1 – 2                 | Liquida | Anticorpo biotinilato   | 8 µg/ml                     | Ovina, monoclonale          |
| 3 – 4                 | Liquida | Chemibead NT-proBNP     | 150 µg/ml                   | Ovina, monoclonale          |
| 7 – 8                 | Liquida | Sensibead streptavidina | 1400 µg/ml                  | <i>E. coli</i> ricombinante |
| 9 – 12                | Liquida | Tampone per il test     |                             |                             |

a. I pozzetti sono numerati in sequenza a partire dall'estremità larga della cartuccia.

b. Valore nominale per pozzetto in una cartuccia.

#### Rischio e sicurezza:

H317

P280, P272, P302 + P352, P333 + P313, P501

#### Avvertenza!

Può provocare una reazione allergica cutanea.

Indossare guanti/indumenti protettivi/Proteggere gli occhi/il viso. Gli indumenti da lavoro contaminati non devono essere portati fuori dal luogo di lavoro. IN CASO DI CONTATTO CON LA PELLE: lavare abbondantemente con acqua e sapone. In caso di irritazione o eruzione della pelle: consultare un medico. Smaltire il prodotto e il contenitore in conformità con tutte le disposizioni locali, regionali e nazionali.

**Contiene:** 5-chloro-2-methyl-3(2h)-isothiazolone mixture with 2-methyl-3(2h)-isothiazolone

Le schede di sicurezza sono disponibili sul sito [siemens.com/healthcare](http://siemens.com/healthcare)

**Precauzioni:** le provette di reazione LOCI® usate contengono liquidi di origine umana; maneggiare con cura per evitarne il contatto con la pelle o l'ingestione.

Per uso diagnostico *in vitro*.

**Preparazione del reagente:** Tutti i reagenti sono liquidi e pronti per l'uso.

**Conservare a:** 2 – 8 °C.

**Scadenza:** Per la data di scadenza delle singole cartucce reagenti chiuse, fare riferimento alla confezione. I pozzetti sigillati sullo strumento sono stabili per 30 giorni.

**Stabilità pozzetto aperto:** 5 giorni per i pozzetti da 1 a 12

**Raccolta e manipolazione dei campioni:** tipi di campioni consigliati: Campioni di siero e plasma (litio eparina o sodio eparina ed EDTA).

**Non è possibile utilizzare campioni e controlli stabilizzati con azide.**

Prelevare siero e plasma utilizzando le procedure raccomandate per il prelievo di campioni di sangue per diagnostica mediante venopuntura.<sup>21,22,23</sup> Ciascun laboratorio deve determinare il proprio protocollo di raccolta/tempistiche per i campioni.

Per l'uso del dispositivo di raccolta dei campioni e l'analisi, seguire le istruzioni fornite con esso.<sup>23</sup>

Prima della centrifugazione deve avvenire la completa formazione del coagulo. Siero e plasma devono essere separati fisicamente dalle cellule nel più breve tempo possibile, con un limite massimo di 2 ore dal prelievo.<sup>24</sup> I campioni devono essere privi di materiale corpuscolato.

Se il tempo di coagulazione aumenta in seguito a terapia anticoagulante o trombolitica, l'impiego di campioni di plasma consentirà un processo di analisi del campione più rapido e ridurrà il rischio di interferenza da materiale corpuscolato.<sup>21,24</sup>

I campioni sono stabili per tre giorni se conservati a 20 – 25 °C o a 2 – 8 °C o per 12 mesi se congelati a -20 °C o meno.<sup>25</sup> Evitare di congelare e scongelare ripetutamente i campioni.

Accertarsi che campioni paziente, calibratori e controlli vengano equilibrati a temperatura ambiente (da 22 a 28 °C) prima della procedura di analisi. I campioni contenenti precipitati devono essere centrifugati prima di eseguire l'analisi.

#### Procedura

##### Materiale fornito

Cartuccia reagente PBNP Flex®, Codice K6423A

##### Materiale necessario ma non fornito

CAL PBNP, Cod. Codice KC676A

#### Prodotti di controllo qualità quali:

- Controllo proBNP MAS® CardiImmune® / MAS® CardiImmune® TL/XL MoniTrol Cardiac TL
- Controllo marker cardiaco liquido CardiImmune® TL testato
- MAS® e CardiImmune® sono marchi registrati di Medical Analysis Systems, Inc. Camarillo, CA.
- Controlli marker cardiaci Bio-Rad Liquechek™
- Liquechek™ è un marchio di Bio-Rad Laboratories, Irvine, California 92618.
- Controllo BNP Audit™ MicroFD™
- Audit™ e MicroFD™ sono marchi di Audit™ MicroControls, Inc. Las Vegas, NV 89102.

#### Fasi del test

Il sistema Dimension Vista® effettua automaticamente il campionamento, l'erogazione del reagente, la miscelazione e il processo di analisi. Per ulteriori informazioni su tale processo, fare riferimento alla Guida per l'operatore di Dimension Vista®.

#### Condizioni del test

|                                             |                   |
|---------------------------------------------|-------------------|
| Volume di campione (erogato nella provetta) | 8 µl              |
| Volume di reagente Chemibead                | 20 µl             |
| Volume reagente anticorpo biotinilato       | 20 µl             |
| Volume sensibead                            | 15 µl             |
| Volume tampone di misura                    | 100 µl            |
| Temperatura                                 | 37.0 °C           |
| Tempo di reazione                           | 10 minuti         |
| Lunghezza d'onda                            | 680 e 612 nm      |
| Tipo di misurazione                         | Chemiluminescenza |

#### Calibrazione

|                                |                                      |
|--------------------------------|--------------------------------------|
| Materiale di calibrazione      | Calibratore PBNP, Num. Codice KC676A |
| Schema di calibrazione         | 5 livelli, n = 3                     |
| Unità                          | pg/ml                                |
| Livelli di calibrazione tipici |                                      |

Frequenza di calibrazione

Occorre effettuare una nuova calibrazione:

- Ogni 30 giorni per ciascun lotto
- Se i risultati della verifica di calibrazione sono accettabili, è possibile ampliare l'intervallo di calibrazione.
- Per ogni nuovo lotto di cartucce reagenti Flex®
- In seguito a manutenzione o riparazione importante, se indicato dai risultati del controllo qualità
- Se indicato nelle procedure del controllo qualità del laboratorio
- Quando richiesto in base alle normative in vigore

## Controllo qualità

Almeno una volta al giorno, analizzare due livelli di materiale Controllo qualità (QC) con concentrazioni note di NT-proBNP. Seguire le procedure di controllo qualità interne del laboratorio se i risultati ottenuti non rientrano nei limiti accettabili.

**Risultati:** Lo strumento calcola la concentrazione di PBNP in pg/ml., utilizzando lo schema di calcolo descritto nella Guida per l'operatore Dimension Vista®.

**I risultati di questo test devono essere sempre interpretati alla luce della anamnesi del paziente, della presentazione clinica e valutando contestualmente l'esito di altri accertamenti.**

### Intervallo di misura analitica (AMR): 5 – 35000 pg/ml

È l'intervallo dei valori di analita che è possibile misurare direttamente dal campione senza alcuna diluizione o pretrattamento che non sia parte integrante del processo di analisi abituale ed è equivalente all'intervallo di misura.

- I campioni con risultati superiori a 35000 pg/ml devono essere diluiti e rianalizzati.

**Diluizione manuale:** Diluire con acqua di grado reagente per ottenere risultati compresi nell'intervallo accettabile. Immettere nello strumento il fattore di diluizione. Ripetere l'analisi. La lettura che ne risulta è quella corretta per la diluizione.

**Autodiluizione (AD):** Lo strumento esegue una diluizione di 1:5 nella piastra delle aliquote e il campione normale di 8 µl viene comunque utilizzato per i campioni fuori intervallo. Fare riferimento alla Guida per l'operatore di Dimension Vista®.

- I campioni con risultati inferiori a 5 pg/ml saranno indicati come "inferiori a 5 pg/ml" dallo strumento.

### Limiti della procedura

Le concentrazioni di peptidi natriuretici possono essere elevate nei pazienti affetti da infarto acuto del miocardio, nei pazienti candidati alla dialisi renale e nei pazienti già sottoposti a dialisi renale.

È possibile che i campioni prelevati dai pazienti contengano anticorpi eterofili in grado di reagire negli immunodosaggi producendo risultati errati per eccesso o per difetto. Questo test è stato configurato per ridurre al minimo l'interferenza da anticorpi eterofili. Ciononostante, la completa eliminazione di questa interferenza da tutti i campioni dei pazienti non può essere garantita.

Il risultato di un test in contrasto con il quadro clinico e l'anamnesi del paziente deve essere interpretato con cautela.<sup>26,27</sup>

Il sistema di refertazione dello strumento contiene avvisi e commenti per fornire all'utente informazioni sugli errori di analisi dello strumento, informazioni sullo stato dello strumento e i potenziali errori nei risultati relativi al PBNP. Per il significato dei flag e/o commenti dei referti, consultare il Manuale per l'operatore di Dimension Vista®. I referti contenenti flag e/o commenti devono essere trattati secondo il manuale di procedura del proprio laboratorio e non vanno refertati.

I campioni che contengono biotina a una concentrazione di 100 ng/ml dimostrano una variazione nei risultati inferiore o pari al 10%. Concentrazioni di biotina superiori a questa potrebbero portare a risultati falsamente sottostimati nei campioni dei pazienti.

A causa di possibili interferenze con questo test, i risultati dei pazienti che assumono integratori a base di biotina o una terapia con biotina a dosi elevate devono essere interpretati con attenzione.

### Ripetibilità massima osservata

Le massime deviazioni standard osservate attese per la ripetibilità (precisione intra-serie) con l'utilizzo di n = 5 ripetizioni alle seguenti concentrazioni di analita sono:

| Concentrazione PBNP | SD massima accettabile |
|---------------------|------------------------|
| 125 pg/ml           | 6.5 pg/ml              |
| 450 pg/ml           | 21.4 pg/ml             |

Il superamento della deviazione standard (SD) massima accettabile può essere dovuto a un malfunzionamento del sistema.

### Valori attesi

Nelle tabelle seguenti sono riportate le concentrazioni di NT-proBNP nel Gruppo di riferimento. Ciascun laboratorio deve stabilire il proprio intervallo di riferimento per il metodo PBNP come determinato nel sistema Dimension Vista®. Le soglie decisionali mediche raccomandate, per gruppo di età, sono:

Pazienti < 75 anni: 125 pg/ml

Pazienti ≥ 75 anni: 450 pg/ml

### Gruppo di studio di riferimento

Le concentrazioni di NT-proBNP sono state determinate in 318 individui che non presentavano segni di insufficienza cardiaca congestizia (163 donne e 155 uomini). Questa popolazione comprendeva individui apparentemente sani e individui con diabete, ipertensione e pneumopatie. Nella tabella seguente sono riportate le statistiche delle concentrazioni di NT-proBNP nel gruppo di studio di riferimento.

### Gruppo di studio di riferimento

| Tutti          | <55 anni | 55 – 64 anni | 65 – 74 anni | ≥ 75 anni |
|----------------|----------|--------------|--------------|-----------|
| Media          | 45.9     | 54.6         | 175.5        | 451.3     |
| SD             | 53.6     | 62.3         | 197.6        | 987.1     |
| Mediana        | 27.2     | 28.8         | 106.2        | 173.5     |
| 95° percentile | 131.2    | 206.6        | 880.8        | 1615.7    |
| % < 125 pg/ml  | 94%      | 80%          | 61%          | -         |
| % < 450 pg/ml  | -        | -            | -            | 79%       |
| N              | 163      | 15           | 18           | 122       |

| Uomini         | <55 anni | 55 – 64 anni | 65 – 74 anni | ≥ 75 anni |
|----------------|----------|--------------|--------------|-----------|
| Media          | 39.0     | 56.7         | 219.4        | 520.8     |
| SD             | 57.8     | 58.2         | 242.4        | 1080.9    |
| Mediana        | 16.6     | 25.4         | 123.6        | 173.5     |
| 95° percentile | 168.8    | 154.7        | 880.8        | 1969.7    |
| % < 125 pg/ml  | 93%      | 83%          | 55%          | -         |
| % < 450 pg/ml  | -        | -            | -            | 73%       |
| N              | 76       | 6            | 11           | 62        |

| Donne          | <55 anni | 55 – 64 anni | 65 – 74 anni | ≥ 75 anni |
|----------------|----------|--------------|--------------|-----------|
| Media          | 51.9     | 53.2         | 106.6        | 379.5     |
| SD             | 49.2     | 68.3         | 60.8         | 883.1     |
| Mediana        | 39.4     | 28.8         | 87.7         | 167.3     |
| 95° percentile | 124.0    | 206.6        | 215.2        | 1453.2    |
| % < 125 pg/ml  | 95%      | 78%          | 71%          | -         |
| % < 450 pg/ml  | -        | -            | -            | 85%       |
| N              | 87       | 9            | 7            | 60        |

### Gruppo di studio della patologia

Sono stati prelevati campioni di sangue a 269 pazienti con diagnosi di insufficienza cardiaca congestizia (ICC). La popolazione comprendeva 78 donne e 191 uomini. Le statistiche descrittive e le classi funzionali della New York Heart Association (NYHA) vengono fornite di seguito. Ciascun laboratorio deve stabilire un intervallo di riferimento che rappresenti la popolazione di pazienti da valutare. Inoltre, i laboratori devono prestare particolare attenzione alla pratica corrente del proprio istituto per la valutazione della ICC.

| Popolazione ICC – Tutti | <55 anni | 55 – 64 anni | 65 – 74 anni | ≥ 75 anni |
|-------------------------|----------|--------------|--------------|-----------|
| Media                   | 6131.8   | 4455.5       | 6168.1       | 8142.7    |
| SD                      | 13470.3  | 9296.0       | 10950.5      | 12699.1   |
| Mediana                 | 1550.9   | 1639.5       | 2541.3       | 3780.5    |
| 95° percentile          | 28099.6  | 19481.5      | 17768.6      | 26923.1   |
| % > 125 pg/ml           | 89%      | 92%          | 95%          | -         |
| % > 450 pg/ml           | -        | -            | -            | 94%       |
| N                       | 72       | 72           | 59           | 66        |

| Popolazione ICC – Uomini | <55 anni | 55 – 64 anni | 65 – 74 anni | ≥ 75 anni |
|--------------------------|----------|--------------|--------------|-----------|
| Media                    | 7771.4   | 4954         | 6537.2       | 8827.3    |
| SD                       | 15797.2  | 10536.7      | 12383.9      | 12856.6   |
| Mediana                  | 2526.1   | 1699.8       | 2541.3       | 5529.2    |
| 95° percentile           | 31237.1  | 19481.5      | 17768.6      | 18634.8   |
| % > 125 pg/ml            | 94%      | 94%          | 93%          | -         |
| % > 450 pg/ml            | -        | -            | -            | 96%       |
| N                        | 48       | 51           | 43           | 49        |

| Popolazione ICC – Donne | <55 anni | 55 – 64 anni | 65 – 74 anni | ≥ 75 anni |
|-------------------------|----------|--------------|--------------|-----------|
| Media                   | 2852.6   | 3244.9       | 5176.1       | 6169.7    |
| SD                      | 5774.0   | 5200.7       | 5727.8       | 12397.4   |
| Mediana                 | 452.3    | 1516.9       | 2270.8       | 1125.3    |
| 95° percentile          | 15569.3  | 7903.1       | 16889.9      | 45824.4   |
| % > 125 pg/ml           | 79%      | 86%          | 100%         | -         |
| % > 450 pg/ml           | -        | -            | -            | 88%       |
| N                       | 24       | 21           | 16           | 17        |

| Popolazione ICC – Tutti | Tutti ICC | NYHA I  | NYHA II | NYHA III | NYHA IV |
|-------------------------|-----------|---------|---------|----------|---------|
| Media                   | 6184.5    | 3941.9  | 3648.8  | 6643.1   | 11089.2 |
| SD                      | 11737.8   | 8461.3  | 4897.0  | 13567.0  | 14428.2 |
| Mediana                 | 2282.2    | 1161.0  | 1091.7  | 2541.3   | 4537.7  |
| 5° percentile           | 101.1     | 100.4   | 46.6    | 143.1    | 74.6    |
| 95° percentile          | 22331.9   | 14184.1 | 14238.5 | 17497.1  | 28099.6 |
| % > soglia              | 92%       | 93%     | 90%     | 94%      | 88%     |
| Minimo                  | 5.1       | 52.8    | 24.5    | 5.1      | 39.6    |
| Massimo                 | 91446.4   | 52327.0 | 18634.8 | 91446.4  | 78045.2 |
| N                       | 269       | 45      | 60      | 124      | 40      |

| Popolazione ICC – Uomini | Tutti ICC | NYHA I  | NYHA II | NYHA III | NYHA IV |
|--------------------------|-----------|---------|---------|----------|---------|
| Media                    | 7012.1    | 4567.5  | 4402.2  | 7298.4   | 14351.2 |
| SD                       | 12991.9   | 9204.3  | 5167.4  | 14789.5  | 17258.9 |
| Mediana                  | 3162.6    | 1639.5  | 2230.9  | 3442.2   | 6015.9  |
| 5° percentile            | 126.1     | 136.3   | 46.5    | 126.1    | 101.1   |
| 95° percentile           | 24004.7   | 19481.5 | 14238.5 | 17497.1  | 31237.1 |
| % > soglia               | 94%       | 97%     | 93%     | 95%      | 91%     |
| Minimo                   | 5.1       | 72.5    | 44.7    | 5.1      | 74.6    |
| Massimo                  | 91446.4   | 52327.0 | 18634.8 | 91446.4  | 78045.2 |
| N                        | 191       | 37      | 40      | 91       | 23      |

| Popolazione ICC – Donne | Tutti ICC | NYHA I | NYHA II | NYHA III | NYHA IV |
|-------------------------|-----------|--------|---------|----------|---------|
| Media                   | 4157.8    | 1048.3 | 2142.1  | 4836.0   | 6676.0  |
| SD                      | 7561.7    | 1636.1 | 4008.9  | 9366.5   | 7864.9  |
| Mediana                 | 950.2     | 225.4  | 705.3   | 1286.7   | 3780.5  |
| 5° percentile           | 84.3      | 52.8   | 24.5    | 143.1    | 39.6    |
| 95° percentile          | 22331.9   | 4960.2 | 11020.8 | 26923.1  | 22997.0 |
| % > soglia              | 87%       | 75%    | 85%     | 94%      | 82%     |
| Minimo                  | 24.5      | 52.8   | 24.5    | 126.8    | 39.6    |
| Massimo                 | 45824.4   | 4960.2 | 15893.8 | 45824.4  | 22997.0 |
| N                       | 78        | 8      | 20      | 33       | 17      |

Questi risultati indicano l'esistenza di una relazione tra la gravità dei segni clinici e dei sintomi di ICC e la concentrazione mediana di NT-proBNP dimostrando che è possibile utilizzare il metodo PBNP Dimension Vista® come ausilio diagnostico per tutti i livelli di gravità della ICC, compresi i pazienti asintomatici.

#### Interpretazione dei risultati

La Curva ROC (Receiver Operator Characteristics, Caratteristica operativa del ricevitore) presenta la sensibilità e specificità clinica a vari livelli di concentrazione (soglia) per i 269 pazienti con diagnosi di ICC e i 318 soggetti senza ICC. La curva ROC per i test PBNP Dimension Vista® è illustrata di seguito. L'area AUC (area under curve - area al di sotto della curva) per i test PBNP Dimension Vista® è di 0.928 con un intervallo di confidenza al 95% di 0.907 - 0.949.

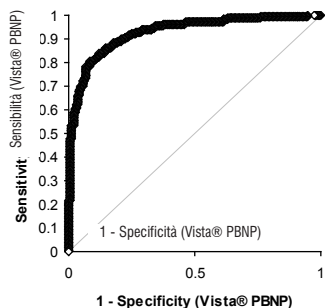

Qui di seguito è illustrato un grafico a scatola della popolazione dello studio clinico. Le soglie cliniche raccomandate sono di 125 pg/ml per i pazienti di età inferiore a 75 anni e di 450 pg/ml per i pazienti di età pari o superiore ai 75 anni. Nel grafico non vengono visualizzati i sei campioni del gruppo della patologia con valori superiori all'intervallo di misura.

Valori PBNP Vista® per i gruppi di riferimento e con patologia

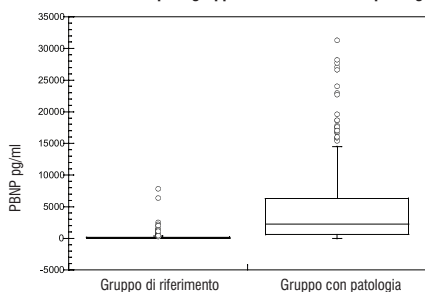

#### Sensibilità e specificità rispetto a età e sesso

Le tabelle riportate di seguito mostrano la sensibilità e la specificità clinica dei test PBNP Dimension Vista® con una soglia di 125 pg/ml per i pazienti di età inferiore a 75 anni e di 450 pg/ml per i pazienti di età pari o superiore a 75 anni.

| Uomini                       | <75 anni    | ≥ 75 anni     |
|------------------------------|-------------|---------------|
|                              | Sensibilità | 94% (133/142) |
| Intervallo di confidenza 95% | 90 - 98     | 90 - 100      |
| Specificità                  | 87% (81/93) | 73% (45/62)   |
| Intervallo di confidenza 95% | 80 - 94     | 61 - 84       |

| Donne                        | <75 anni     | ≥ 75 anni   |
|------------------------------|--------------|-------------|
|                              | Sensibilità  | 89% (54/61) |
| Intervallo di confidenza 95% | 81 - 97      | 73 - 100    |
| Specificità                  | 92% (95/103) | 85% (51/60) |
| Intervallo di confidenza 95% | 87 - 97      | 76 - 94     |

#### Analisi ROC basata sulla corrispondenza di età

È stata eseguita un'analisi ROC basata sulla corrispondenza di età dei dati clinici utilizzando il metodo ponderato descritto da Kondratovich (2002).<sup>28</sup> L'AUC risultante è 0.929 con un intervallo di confidenza pari al 95% di 0.909 - 0.950.

#### Caratteristiche specifiche di prestazione

I dati seguenti rappresentano le prestazioni tipiche per il Sistema Dimension Vista®.

##### Precisione<sup>29,c</sup>

| Materiale                 | Media pg/ml | Deviazione standard (%CV) |                   |
|---------------------------|-------------|---------------------------|-------------------|
|                           |             | Ripetibilità              | Intra-laboratorio |
| Pool di siero 1           | 120         | 1.72 (14)                 | 2.06 (17)         |
| Pool di siero 2           | 438         | 4.75 (1.1)                | 4.75 (1.1)        |
| Pool di siero 3           | 880         | 9.05 (1.0)                | 12.24 (1.4)       |
| Pool di siero 4           | 5075        | 69.06 (1.4)               | 91.97 (1.8)       |
| Controllo qualità interno | 32633       | 763.39 (2.3)              | 1140.27 (3.5)     |

c. È stato utilizzato CLSI/NCCLS EP5-A2. Durante ogni giorno di test, per 20 giorni sono state eseguite due analisi separate, con due campioni di test, per ogni materiale di test.

#### Comparazione dei metodi<sup>30,d</sup>

##### Equivalenza tra siero e plasma

I risultati dei test di confronto eseguiti sul sistema Dimension Vista® per i campioni di sodio eparina e EDTA rispetto ai campioni di siero sono i seguenti:

| Campione comparativo | Pendenza | Intercetta pg/ml | Coefficiente di correlazione | n  |
|----------------------|----------|------------------|------------------------------|----|
| Lito eparina         | 1.01     | -2.0             | 0.9984                       | 53 |
| Sodio eparina        | 1.00     | 4.8              | 0.9987                       | 57 |
| EDTA                 | 1.00     | 0.5              | 0.9997                       | 59 |

d. L'equazione del modello per la regressione di Passing-Bablok è: [risultati per sistema Dimension Vista®] = pendenza x [risultati siero] + intercetta.

##### Statistiche di regressione<sup>e</sup>

| Metodo comparativo                  | Pendenza | Intercetta pg/ml | Coefficiente di correlazione | n                |
|-------------------------------------|----------|------------------|------------------------------|------------------|
| PBNP Dimension Vista® (policlonale) | 1.02     | -3.2             | 0.996                        | 160 <sup>f</sup> |

e. È stato utilizzato CLSI/NCCLS EP9-A2. Per l'adattamento con la linea di regressione è stato usato il metodo Passing-Bablok.

f. L'intervallo dei 160 valori nello studio delle correlazioni era compreso tra 12 e 29519 pg/ml.

#### Specificità

##### Interferenza HIL

Il metodo PBNP è stato valutato per le interferenze rispetto a emolisi, ittero e lipemia (HIL) in conformità al CLSI/NCCLS EP7-A2.<sup>31</sup> Il bias è la differenza, espressa in percentuale, fra i risultati del campione di controllo (senza la sostanza interferente) e quelli del campione di test (che contiene la sostanza interferente). Un bias superiore al 10% è considerato un'interferenza.

| Sostanza analizzata        | Concentrazione della sostanza    | NT-proBNP pg/ml | Bias* % |
|----------------------------|----------------------------------|-----------------|---------|
| Emoglobina                 | Emoglobina (monomero)            | 134             |         |
|                            | 1000 mg/dl [mmol/l] <sup>9</sup> | 2044            | < 10    |
| Bilirubina (non coniugata) | 60 mg/dl [1026 μmol/l]           | 132             |         |
|                            |                                  | 2019            | < 10    |
| Bilirubina (coniugata)     | 60 mg/dl [1026 μmol/l]           | 134             |         |
|                            |                                  | 2066            | < 10    |
| Lipemia (Intralipid®)      | 3000 mg/dl [33.9 mmol/l]         | 131             |         |
|                            |                                  | 2028            | < 10    |

Intralipid® è un marchio registrato di Fresenius Kabi AG, Bad Homburg, Germania.

\* I risultati dell'analisi non devono essere corretti in base a questa differenza.

g. Le unità SI (Système International d'Unités) sono tra parentesi.

##### Sostanze non interferenti

Le seguenti sostanze non interferiscono con il metodo PBNP quando presenti nel siero alle concentrazioni indicate. A una concentrazione di NT-proBNP di 135 e 2000 pg/ml le imprecisioni (bias) dovute a queste sostanze sono inferiori al 10%.

| Composto                | Concentrazione | Unità SI     |
|-------------------------|----------------|--------------|
| Abciximab               | 21 μg/ml       | 441 μmol/l   |
| Acetaminofene           | 0.025 mg/dl    | 1.66 μmol/l  |
| Allopurinolo            | 2.5 mg/dl      | 184 μmol/l   |
| Amikacina               | 15 mg/dl       | 256 μmol/l   |
| Amiodarone              | 20 μg/ml       | 31 μmol/l    |
| Amlodipina besilato     | 4 μg/ml        | 7.1 μmol/l   |
| Ampicillina             | 5.3 mg/dl      | 152 μmol/l   |
| Acido ascorbico         | 5 mg/dl        | 227 μmol/l   |
| Atenolo                 | 1.0 mg/dl      | 37.6 μmol/l  |
| Atorvastatina           | 32 mg/dl       | 26.5 μmol/l  |
| Caffeina                | 6 mg/dl        | 308 μmol/l   |
| Captopril               | 5.0 mg/dl      | 230 μmol/l   |
| Carbamazepina           | 3 mg/dl        | 127 μmol/l   |
| Cloramfenicolo          | 5 mg/dl        | 155 μmol/l   |
| Clordiazepossido        | 1 mg/dl        | 33.3 μmol/l  |
| Clorpromazina           | 0.2 mg/dl      | 6.27 μmol/l  |
| Colesterolo             | 500 mg/dl      | 12.9 mmol/l  |
| Cimetidina              | 2 mg/dl        | 79.2 μmol/l  |
| Cinnarizina             | 3.0 mg/dl      | 81.4 μmol/l  |
| Clopidogrel bisolfato   | 30 μg/ml       | 71.4 μmol/l  |
| Creatinina              | 30 mg/dl       | 2652 μmol/l  |
| Ciclosporina A          | 4000 ng/ml     | 3.3 μmol/l   |
| Destrano 40             | 6000 mg/dl     | 1500 μmol/l  |
| Diazepam                | 0.5 mg/dl      | 17.6 μmol/l  |
| Diclofenac              | 60 μg/ml       | 188.6 μmol/l |
| Digitossina             | 60 ng/ml       | 78.6 nmol/l  |
| Digossina               | 5 ng/ml        | 6.15 nmol/l  |
| Diltiazem               | 120 μg/ml      | 266.1 μmol/l |
| Dipiridamolo            | 30 μg/ml       | 59.4 μmol/l  |
| Disopiramide            | 40 μg/ml       | 117 μmol/l   |
| Dopamina                | 65 mg/dl       | 3.4 mmol/l   |
| Enalapril maleato       | 16 ug/ml       | 32.5 μmol/l  |
| Eritromicina            | 6 mg/dl        | 81.6 μmol/l  |
| Etanolo                 | 400 mg/dl      | 86.8 mmol/l  |
| Etosuccimide            | 25 mg/dl       | 1770 μmol/l  |
| Furosemide              | 6 mg/dl        | 181 μmol/l   |
| Gentamicina             | 12 mg/dl       | 251 μmol/l   |
| Eparina                 | 3 U/ml         | 3000 U/l     |
| Idralazina              | 20 μg/ml       | 101.7 μmol/l |
| Idroclorotiazide        | 20 μg/ml       | 67.2 μmol/l  |
| Ibuprofene              | 50 mg/dl       | 2425 μmol/l  |
| Immunoglobulina G (IgG) | 5 g/dl         | 50 g/l       |



| Composto             | Concentrazione | Unità SI      |
|----------------------|----------------|---------------|
| Indometacina         | 16 µg/ml       | 36.9 µmol/l   |
| Isosorbide dinitrato | 6.0 mg/dl      | 254 µmol/l    |
| Lidocaina            | 1.2 mg/dl      | 51.2 µmol/l   |
| Lisinopril           | 16 µg/ml       | 36.2 µmol/l   |
| Litio                | 2.3 mg/dl      | 3.2 mmol/l    |
| Lovastatina          | 16 µg/ml       | 39.6 µmol/l   |
| L-tiroxina           | 60 µg/dl       | 0.77 µmol/l   |
| Metildopa            | 2.5 mg/dl      | 118 µmol/l    |
| Milrinone lattato    | 2.4 µg/ml      | 11.4 µmol/l   |
| Nicotina             | 0.1 mg/dl      | 6.2 µmol/l    |
| Nifedipina           | 6.0 mg/dl      | 173 µmol/l    |
| Nitrofurantoina      | 40 µg/ml       | 168 µmol/l    |
| Nitroglicerina       | 0.16 µg/ml     | 0.577 µmol/l  |
| Oxazepam             | 12 µg/ml       | 41.8 µmol/l   |
| Ossitetraclina       | 100 µg/ml      | 217.2 µmol/l  |
| Pericillina G        | 25 U/ml        | 25000 U/l     |
| Pentobarbitale       | 8 mg/dl        | 354 µmol/l    |
| Fenobarbitale        | 10 mg/dl       | 431 µmol/l    |
| Fenitoina            | 5 mg/dl        | 198 µmol/l    |
| Primidone            | 4 mg/dl        | 183 µmol/l    |
| Probenecid           | 200 µg/ml      | 700.9 µmol/l  |
| Propossifene         | 0.2 mg/dl      | 4.91 µmol/l   |
| Propranololo         | 0.15 mg/dl     | 5.1 µmol/l    |
| Proteina: Albumina   | 6 g/dl         | 60 g/l        |
| Proteina: totale     | 11.1 g/dl      | 111 g/l       |
| Chimidina            | 20 µg/ml       | 61.6 µmol/l   |
| Fattore reumatoide   | 500 IU/ml      | 500 IU/ml     |
| Acido salicilico     | 60 mg/dl       | 4.34 mmol/l   |
| Simvastatina         | 32 µg/ml       | 76.5 µmol/l   |
| Sulfametossazolo     | 320 µg/ml      | 1263.3 µmol/l |
| Teofillina           | 4 mg/dl        | 222 µmol/l    |
| Trimetoprim          | 64 µg/ml       | 220.7 µmol/l  |
| Urea                 | 500 mg/dl      | 83.3 mmol/l   |
| Acido urico          | 20 mg/dl       | 1190 µmol/l   |
| Acido valproico      | 50 mg/dl       | 3467 µmol/l   |
| Verapamil            | 16 mg/dl       | 0.33 µmol/l   |
| Warfarina            | 4 µg/ml        | 130 µmol/l    |

#### Effetto gancio

Gli immunodosaggi monofase a sandwich sono soggetti ad un "effetto gancio" ad alte dosi, in cui un eccesso di antigene impedisce che gli anticorpi di cattura e di individuazione si leghino simultaneamente a una singola molecola di analita.<sup>32</sup> Questi campioni vanno diluiti e rianalizzati prima di riportare i risultati. Il metodo PBNP non mostra effetti gancio fino a 400,000 pg/ml.

#### Cross-reattività

Le seguenti sostanze non mostrano cross-reattività significativa (inferiore all'1%) alle concentrazioni indicate quando aggiunte a campioni contenenti NT-proBNP di circa 0 pg/ml e 125 pg/ml:

| Sostanza                                                   | Concentrazione |
|------------------------------------------------------------|----------------|
| ANP <sub>28</sub>                                          | 3.1 µg/ml      |
| NT-proANP <sub>1-30</sub> (preproANP <sub>26-55</sub> )    | 3.5 µg/ml      |
| NT-proANP <sub>31-67</sub> (preproANP <sub>56-92</sub> )   | 1.0 ng/ml      |
| NT-proANP <sub>79-98</sub> (preproANP <sub>104-123</sub> ) | 1.0 ng/ml      |
| BNP <sub>32</sub> (Natreacor®)                             | 3.5 µg/ml      |
| CNP <sub>32</sub>                                          | 2.2 µg/ml      |
| DNP                                                        | 1.0 ng/ml      |
| VNP                                                        | 1.0 ng/ml      |
| Adrenomedullina                                            | 1.0 ng/ml      |
| Aldosterone                                                | 0.6 ng/ml      |
| Angiotensina I                                             | 0.6 ng/ml      |
| Angiotensina II                                            | 0.6 ng/ml      |
| Angiotensina III                                           | 1.0 ng/ml      |
| Endotelina                                                 | 20 pg/ml       |
| Renina                                                     | 50 ng/ml       |
| Urodilatina                                                | 3.5 µg/ml      |
| Arg-Vasopressina                                           | 1.0 ng/ml      |

#### Sensibilità analitica: ≤ 5 pg/ml

La sensibilità analitica del metodo PBNP è ≤ 5 pg/ml. La sensibilità analitica viene definita come la concentrazione a due deviazioni standard (n = 20) al di sopra di un campione privo di NT-proBNP, come il Calibratore di livello 1 PBNP (0 pg/ml).

#### Limite di rilevamento: 0.8 pg/ml

Il limite di rilevamento (LoD) per l'ANALITA è di 0.8 pg/ml, in conformità alla linea guida CLSI EP17-A e con percentuali di falsi positivi (α) inferiori al 5% e di falsi negativi (β) inferiori al 5%, sulla base di 60 determinazioni, con 5 campioni di bianco e 5 campioni di livello basso. Il LoD è la concentrazione più bassa che è possibile rilevare in modo affidabile.

#### Sensibilità funzionale: valutazione del limite CV del 20%

La sensibilità funzionale è stata valutata determinando l'imprecisione totale dei campioni di siero NT-proBNP naturale. L'imprecisione totale è stata misurata mediante uno studio ANOVA con due ripetizioni al giorno, per venti giorni. La sensibilità funzionale/profilo di imprecisione per il metodo PBNP Dimension Vista® corrisponde a un coefficiente di variazione (CV) del 20% a un livello di NT-proBNP di ≤ 30 pg/ml.

#### Linearità di diluizione

Un campione di plasma proveniente da pazienti che presentano una concentrazione elevata di NT-proBNP è stato diluito per l'intero intervallo di misura. Campioni di plasma aggiuntivi sono stati diluiti in modo lineare per confermare l'accuratezza della diluizione ai valori inferiori dell'intervallo di misura. Tutti i campioni sono stati diluiti con pool di campioni di plasma provenienti da pazienti che presentavano livelli bassi. Nella tabella che segue sono riassunti i risultati degli studi:

|                                   | Campione A | Campione B |
|-----------------------------------|------------|------------|
| Concentrazione iniziale (pg/ml)   | 41812      | 1266       |
| <b>Statistiche di regressione</b> |            |            |
| Pendenza                          | 1.004      | 1.003      |
| Intercetta                        | -55.8      | -3.5       |
| Coefficiente di correlazione      | 0.999      | 0.999      |
| N                                 | 5          | 5          |
| <b>% Recupero</b>                 |            |            |
| Medio                             | 99.9       | 99.5       |
| Intervallo                        | 98 – 101   | 98 – 100   |

Prodotto su licenza di Roche Diagnostics.

Brevetto USA 5786163 ed equivalenti stranieri

Applicazione di brevetto USA: 09/890442 ed equivalenti stranieri

**Interpretazione dei simboli:** Vedere la sezione aggiunta.

**Bibliografia:** Vedere la sezione aggiunta.

Dimension Vista®, LOCI®, Dimension® e Flex® sono marchi di Siemens Healthcare Diagnostics.

©2008 Siemens Healthcare Diagnostics

Tutti i diritti riservati.

## Dimension Vista® System

### Flex® reagent cartridge

### PBNP

Consulte las secciones sombreadas: Información actualizada desde la versión de 2017-04.

Fecha de la edición 2017-10-17

#### Pro-peptido natriurético cerebral N-terminal

**Uso previsto:** El método PBNP es un análisis de diagnóstico *in vitro* para la determinación cuantitativa del propeptido natriurético cerebral N-terminal (NT-proBNP) en suero y plasma humanos en el sistema Dimension Vista®. En los sujetos en los que se sospecha la existencia de insuficiencia cardíaca congestiva (ICC), las determinaciones de NT-proBNP se utilizan como ayuda en el diagnóstico y en la evaluación de la gravedad. Este análisis también está indicado para la estratificación del riesgo en pacientes con síndrome coronario agudo e insuficiencia cardíaca.

**Resumen:** La disfunción del ventrículo izquierdo puede ocurrir como parte de la cardiopatía coronaria, la hipertensión arterial, las valvulopatías y la enfermedad miocárdica primaria. Si la disfunción del ventrículo izquierdo no se trata y es progresiva, la mortalidad potencial es elevada, por ejemplo debido a muerte súbita de origen cardíaco.

La insuficiencia cardíaca crónica es un síndrome clínico causado por un deterioro de la función de bomba del corazón. En función de los síntomas, la New York Heart Association (NYHA) clasifica la gravedad de la insuficiencia cardíaca en estadios I a IV. Para diagnosticar la disfunción del ventrículo izquierdo se utilizan análisis clínicos y procedimientos de diagnóstico por imagen.<sup>1</sup>

Se ha demostrado la importancia de los péptidos natriuréticos en el control de la función del sistema cardiovascular. Los estudios iniciales muestran que los péptidos natriuréticos se pueden utilizar para el diagnóstico de problemas clínicos asociados a la disfunción del ventrículo izquierdo.<sup>2</sup> Se han descrito en la literatura médica los siguientes péptidos natriuréticos: péptido natriurético auricular (ANP), péptido natriurético cerebral (BNP) y péptido natriurético de tipo C (CNP).<sup>3,4</sup>

El ANP y el BNP poseen propiedades natriuréticas y diuréticas. Como antagonistas del sistema de renina-angiotensina-aldosterona, influyen en el equilibrio hidroelectrolítico del organismo.<sup>5,6</sup> En sujetos con disfunción del ventrículo izquierdo, las concentraciones séricas y plasmáticas de BNP aumentan, al igual que las concentraciones de la prohormona biológicamente inactiva, el proBNP. El proBNP consta de 108 aminoácidos. Es secretado fundamentalmente por el ventrículo izquierdo del corazón y, en este proceso, se escinde en el BNP fisiológicamente activo y (77 – 108) y en el fragmento N-terminal NT-proBNP (1 – 76).<sup>4</sup>

Los estudios indican que el NT-proBNP puede utilizarse en aplicaciones diagnósticas y pronósticas.<sup>7 – 13</sup> La concentración de NT-proBNP en el plasma indica el pronóstico de la disfunción del ventrículo izquierdo. También es de utilidad para la atribución de síntomas a causas cardíacas o no cardíacas.

La determinación de NT-proBNP ayuda a identificar a los sujetos con disfunción del ventrículo izquierdo. Los cambios en la concentración de NT-proBNP pueden utilizarse para evaluar el éxito del tratamiento en los pacientes con disfunción del ventrículo izquierdo. Existen indicios de que el NT-proBNP, debido a sus funciones, es adecuado para utilizarse en la evaluación de la remodelación vascular y, por consiguiente, contribuye a establecer procedimientos de rehabilitación individualizados.<sup>10,11</sup>

Fisher y cols. comprobaron que los pacientes con insuficiencia cardíaca congestiva que presentaban concentraciones elevadas de NT-proBNP tenían una tasa de mortalidad al año del 53 % en comparación con la tasa del 11 % de los pacientes con concentraciones más bajas.<sup>12</sup> En el estudio Gusto IV con más de 6800 pacientes, se demostró que el NT-proBNP era el factor pronóstico independiente más potente de la mortalidad al año en los pacientes con síndrome coronario agudo.<sup>13</sup>

El Grupo de trabajo de la European Society of Cardiology para el diagnóstico y el tratamiento de la insuficiencia cardíaca crónica señala en sus directrices lo siguiente en relación con los péptidos natriuréticos, incluido el NT-proBNP: "es posible que sean de mayor utilidad clínica como análisis de descarte, debido a que se asocian a valores pronósticos negativos muy elevados y uniformes".

Las concentraciones de NT-proBNP están elevadas en los pacientes que tienen angina inestable y en los que han sufrido un infarto de miocardio.<sup>14,15</sup> Aunque no son diagnósticas de estos trastornos, diversos estudios indican que las determinaciones de NT-proBNP proporcionan información pronóstica para la estratificación a corto y a largo plazo de los pacientes con angina inestable o infarto de miocardio.<sup>15,16,17</sup>

**Principios del procedimiento:** El método PBNP es un inmunoensayo de quimioluminiscencia tipo sándwich de un paso basado en la tecnología LOCI®. Los reactivos LOCI® incluyen dos reactivos sintéticos en miniesferas y un fragmento de anticuerpo monoclonal biotinilado que reconoce un epítipo situado en la porción N-terminal del proBNP. El primer reactivo en forma de miniesferas (Sensibeads) está recubierto con estreptavidina y contiene un colorante fotosensible. El segundo reactivo en microesferas (Chemibeads) está recubierto con un segundo anticuerpo específico de un segundo epítipo independiente en el NT-proBNP y contiene un colorante quimioluminiscente. La muestra se incuba con las Chemibeads y el anticuerpo biotinilado para formar un sándwich partícula/NT-proBNP/anticuerpo biotinilado.

A continuación, se añaden las Sensibeads y se unen a la biotina para formar un inmunocomplejo de miniesferas agregadas. La iluminación del complejo con luz a 680 nm genera un oxígeno singlete de las Sensibeads, que se difunde a las Chemibeads y desencadena una reacción quimioluminiscente. La señal quimioluminiscente resultante se mide a 612 nm y es directamente proporcional a la concentración de NT-proBNP en la muestra.<sup>18,19,20</sup>

#### Reactivos

| Pocillos <sup>a</sup> | Forma   | Ingrediente                  | Concentración <sup>b</sup> | Origen                      |
|-----------------------|---------|------------------------------|----------------------------|-----------------------------|
| 1 – 2                 | Líquida | Anticuerpo biotinilado       | 8 µg/mL                    | Carnero, monoclonal         |
| 3 – 4                 | Líquida | Chemibeads NT-proBNP         | 150 µg/mL                  | Carnero, monoclonal         |
| 7 – 8                 | Líquida | Sensibeads de estreptavidina | 1400 µg/mL                 | Recombinante <i>E. coli</i> |
| 9 – 12                | Líquida | Tampón del análisis          |                            |                             |

a. Los pocillos están numerados consecutivamente desde el extremo ancho del cartucho.

b. Valor nominal por pocillo en un cartucho.

#### Riesgos y seguridad:

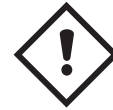

H317  
P280, P272, P302 + P352, P333 + P313, P501

#### iAdvertencia!

Puede provocar una reacción alérgica en la piel.

Llevar guantes/prendas/gafas/máscara de protección. Las prendas de trabajo contaminadas no podrán sacarse del lugar de trabajo. EN CASO DE CONTACTO CON LA PIEL: Lavar con agua y jabón abundantes. En caso de irritación o erupción cutánea: Consultar a un médico. Eliminar el contenido y el recipiente de acuerdo con las normativas locales, regionales y nacionales.

**Contiene:** 5-chloro-2-methyl-3(2H)-isothiazolone mixture with 2-methyl-3(2H)-isothiazolone

Las fichas de datos de seguridad (MSDS/SDS) están disponibles en [siemens.com/healthcare](http://siemens.com/healthcare)

**Precauciones:** Los vasos de reacción LOCI® utilizados contienen fluidos corporales de origen humano; manéjelos con el cuidado adecuado para evitar el contacto con la piel o la ingestión.

Para uso diagnóstico *in vitro*.

**Preparación del reactivo:** Todos los reactivos son líquidos y están listos para su uso.

**Conservar a:** 2 – 8 °C

**Caducidad:** Consulte en el envase la fecha de caducidad de los cartuchos de reactivos individuales sin abrir. En el instrumento, los pocillos sellados son estables durante 30 días.

**Estabilidad de los pocillos abiertos:** 5 días para los pocillos 1 – 12

**Recogida de muestras y manipulación:** Tipos de muestras recomendadas: Muestras de suero o plasma (heparina de litio, heparina de sodio y EDTA).

**No se pueden utilizar muestras y controles estabilizados con azida.**

El suero y el plasma pueden recolectarse utilizando los procedimientos recomendados para la recolección de muestras de sangre de diagnóstico, por venopunción.<sup>21,22,23</sup> Cada laboratorio debe determinar un protocolo adecuado de recogida/cronometraje de muestras.

Siga las instrucciones de uso y procesamiento suministradas con el dispositivo de recogida de muestras.<sup>23</sup>

Antes de la centrifugación, debe producirse la formación completa del coágulo. El suero o el plasma deben separarse físicamente de las células lo antes posible, con un límite máximo de dos horas desde el momento de la obtención de la muestra.<sup>24</sup> Las muestras deben estar libres de partículas.

Si el tiempo de coagulación se aumenta debido a un tratamiento trombolítico o anticoagulante, el uso de muestras de plasma permitirá un procesamiento más rápido de las muestras y reducirá el riesgo de interferencias debidas a partículas.<sup>21,24</sup>

Las muestras son estables durante tres días cuando se conservan a 20 – 25 °C o 2 – 8 °C o durante 12 meses si se congelan a -20 °C o una temperatura inferior.<sup>25</sup> Debe evitarse la congelación y descongelación repetidas de las muestras.

Asegúrese de que las muestras de pacientes, los calibradores y los controles estén equilibrados a temperatura ambiente (22 – 28 °C) antes del análisis. Las muestras que contengan precipitados deben centrifugarse antes de realizar el análisis.

#### Procedimiento

##### Materiales suministrados

Cartucho de reactivo Flex® para PBNP, ref. K6423A

##### Materiales necesarios pero no suministrados

PBNP CAL, ref. KC676A

#### Productos de control de calidad como:

- MAS® CardiImmune® proBNP Control / MAS® CardiImmune® TL/XL MoniTriol Cardiac TL
- CardiImmune® TL Liquid Assayed Cardiac Marker Control
- MAS® y CardiImmune® son marcas registradas de Medical Analysis Systems, Inc. Camarillo, CA.
- Bio-Rad Liquechek™ Cardiac Markers Controls
- Liquechek™ es una marca comercial de Bio-Rad Laboratories, Irvine, California 92618.
- Audit™ MicroFD™ BNP Control
- Audit™ y MicroFD™ son marcas comerciales de Audit™ MicroControls, Inc. Las Vegas, NV 89102.

#### Proceso del análisis

El sistema Dimension Vista® realiza de manera automática el muestreo, la dispensación de reactivos, la mezcla y el procesamiento. Para obtener más detalles sobre este proceso, consulte el Manual del usuario del sistema Dimension Vista®.

| Condiciones del análisis                         |                     |
|--------------------------------------------------|---------------------|
| Volumen de muestra (dispensado en el recipiente) | 8 µL                |
| Volumen de reactivo Chemibeads                   | 20 µL               |
| Volumen de reactivo de anticuerpo biotinilado    | 20 µL               |
| Volumen de Sensibead                             | 15 µL               |
| Volumen del tampón del análisis                  | 100 µL              |
| Temperatura                                      | 37.0 °C             |
| Tiempo de reacción                               | 10 minutos          |
| Longitud de onda                                 | 680 y 612 nm        |
| Tipo de medición                                 | Quimioluminiscencia |

## Calibración

|                                    |                                                                                                                                                                                                                                                                                                                                                                                                                        |
|------------------------------------|------------------------------------------------------------------------------------------------------------------------------------------------------------------------------------------------------------------------------------------------------------------------------------------------------------------------------------------------------------------------------------------------------------------------|
| Material de calibración            | Calibrador de PBNP, ref. KC676A                                                                                                                                                                                                                                                                                                                                                                                        |
| Esquema de calibración             | 5 niveles, n = 3                                                                                                                                                                                                                                                                                                                                                                                                       |
| Unidades                           | pg/mL                                                                                                                                                                                                                                                                                                                                                                                                                  |
| Niveles habituales de calibración  | Nivel 1 (calibrador A): 0 pg/mL<br>Nivel 2 (calibrador B): 250 pg/mL<br>Nivel 3 (calibrador C): 1500 pg/mL<br>Nivel 4 (calibrador D): 12000 pg/mL<br>Nivel 5 (calibrador E): 36750 pg/mL                                                                                                                                                                                                                               |
| Frecuencia de calibración          | Cada 30 días para cualquier lote<br>El intervalo de calibración puede extenderse basándose en una verificación aceptable de la calibración.                                                                                                                                                                                                                                                                            |
| Se requiere una nueva calibración: | <ul style="list-style-type: none"> <li>Para cada lote nuevo de cartuchos de reactivos Flex®</li> <li>Después de la realización de importantes tareas de mantenimiento o servicio, si los resultados de control de calidad así lo indican.</li> <li>Tal como se indica en los procedimientos de control de calidad del laboratorio</li> <li>Cuando es obligatorio según las reglamentaciones gubernamentales</li> </ul> |

## Control de calidad

Al menos una vez por día de uso, analice dos niveles de un material de control de calidad (CC) con concentraciones conocidas de NT-proBNP. Siga los procedimientos internos de CC de su laboratorio si los resultados obtenidos no se encuentran dentro de los límites aceptables.

**Resultados:** El instrumento calcula la concentración de PBNP en pg/mL utilizando el esquema de cálculo descrito en el Manual del usuario del sistema Dimension Vista®.

**Los resultados de esta prueba deberán interpretarse siempre de acuerdo con la historia clínica del paciente, la sintomatología clínica y otras observaciones.**

## Rango de medición analítico (AMR): 5 – 35000 pg/mL

Se trata del rango de valores del analito que puede medirse directamente a partir de la muestra sin requerir dilución ni tratamiento previo que no sea parte del proceso analítico habitual y es equivalente al intervalo del ensayo.

- Las muestras con resultados que superen los 35000 pg/mL deben repetirse con dilución.

**Dilución manual:** Realice una dilución 1:5 con agua de grado reactivo para obtener resultados dentro del rango informable. Introduzca el factor de dilución en el instrumento. Repita el análisis. La lectura resultante se corregirá en función de la dilución.

**Autodilución (AD):** El instrumento realiza una dilución 1:5 en la bandeja de alícuota y la muestra normal de 8 µL se sigue utilizando para muestras por encima del intervalo. Consulte el Manual del usuario de Dimension Vista®.

- El instrumento registrará las muestras con resultados inferiores a 5 pg/mL como "menos de 5 pg/mL".

## Limitaciones del procedimiento

Las concentraciones de péptidos natriuréticos pueden estar elevadas en los pacientes con infarto agudo de miocardio, en pacientes que sean candidatos a diálisis renal y en pacientes que se hayan sometido a diálisis renal.

Las muestras de paciente pueden contener anticuerpos heterófilos que podrían reaccionar en los inmunoensayos y dar resultados falsamente elevados o reducidos. Este análisis se ha diseñado para reducir al mínimo la interferencia causada por anticuerpos heterófilos. Sin embargo, no es posible garantizar la completa eliminación de esta interferencia de todas las muestras de paciente.

Si un resultado de la prueba se contradice con el cuadro clínico y la historia del paciente, deberá interpretarse con precaución.<sup>26,27</sup>

El sistema de generación de informes del instrumento incluye alarmas y comentarios que proporcionan al usuario información relativa a los errores de procesamiento del instrumento, información del estado de éste y posibles errores en los resultados de PBNP. Consulte el Manual del usuario del sistema Dimension Vista® para conocer el significado de las alarmas y los comentarios de los informes. Cualquier informe que contenga alarmas y/o comentarios se debe tratar siguiendo el manual de procedimiento de su laboratorio y no se debe informar sobre él.

Las muestras que contienen biotina en una concentración de 100 ng/mL han demostrado un cambio igual o inferior al 10% en los resultados. Las concentraciones de biotina superiores a esta pueden producir resultados falsamente disminuidos en las muestras de los pacientes.

Los resultados de pacientes que tomen suplementos de biotina o reciban un tratamiento con dosis elevadas de biotina se deben interpretar con precaución debido a la posible interferencia con esta prueba.

## Repetibilidad máxima observada

Las desviaciones estándar máximas que se esperan en función de los datos recogidos para la repetibilidad (precisión intra-ensayo) utilizando 5 duplicados con las siguientes concentraciones nominales de analito son:

| Concentración de PBNP | DE máxima aceptable |
|-----------------------|---------------------|
| 125 pg/mL             | 6.5 pg/mL           |
| 450 pg/mL             | 21.4 pg/mL          |

Es posible que el sistema no funcione correctamente si se excede la DE máxima aceptable.

## Valores esperados

En las tablas siguientes se muestran las concentraciones de NT-proBNP en el Grupo de referencia. Cada laboratorio debe establecer su propio intervalo de referencia para el método PBNP según se determine en el sistema Dimension Vista®. Los umbrales recomendados de decisión médica, por grupo de edad, son:

|                      |           |
|----------------------|-----------|
| Pacientes < 75 años: | 125 pg/mL |
| Pacientes ≥ 75 años: | 450 pg/mL |

## Grupo de estudio de referencia

Se determinaron las concentraciones de NT-proBNP en 318 sujetos sin insuficiencia cardíaca congestiva (163 mujeres y 155 hombres). Esta población incluyó a sujetos aparentemente sanos y a sujetos con diabetes, hipertensión y enfermedad pulmonar. En la tabla siguiente se muestran los estadísticos para las concentraciones de NT-proBNP en el Grupo de estudio de referencia.

## Grupo de estudio de referencia

| Todos         | < 55 años | 55 – 64 años | 65 – 74 años | ≥ 75 años |
|---------------|-----------|--------------|--------------|-----------|
| Media         | 45.9      | 54.6         | 175.5        | 451.3     |
| DE            | 53.6      | 62.3         | 197.6        | 987.1     |
| Mediana       | 27.2      | 28.8         | 106.2        | 173.5     |
| Percentil 95  | 131.2     | 206.6        | 880.8        | 1615.7    |
| % < 125 pg/mL | 94 %      | 80 %         | 61 %         | -         |
| % < 450 pg/mL | -         | -            | -            | 79 %      |
| N             | 163       | 15           | 18           | 122       |

## Hombres

|               | < 55 años | 55 – 64 años | 65 – 74 años | ≥ 75 años |
|---------------|-----------|--------------|--------------|-----------|
| Media         | 39.0      | 56.7         | 219.4        | 520.8     |
| DE            | 57.8      | 58.2         | 242.4        | 1080.9    |
| Mediana       | 16.6      | 25.4         | 123.6        | 173.5     |
| Percentil 95  | 168.8     | 154.7        | 880.8        | 1969.7    |
| % < 125 pg/mL | 93 %      | 83 %         | 55 %         | -         |
| % < 450 pg/mL | -         | -            | -            | 73 %      |
| N             | 76        | 6            | 11           | 62        |

## Mujeres

|               | < 55 años | 55 – 64 años | 65 – 74 años | ≥ 75 años |
|---------------|-----------|--------------|--------------|-----------|
| Media         | 51.9      | 53.2         | 106.6        | 379.5     |
| DE            | 49.2      | 68.3         | 60.8         | 883.1     |
| Mediana       | 39.4      | 28.8         | 87.7         | 167.3     |
| Percentil 95  | 124.0     | 206.6        | 215.2        | 1453.2    |
| % < 125 pg/mL | 95 %      | 78 %         | 71 %         | -         |
| % < 450 pg/mL | -         | -            | -            | 85 %      |
| N             | 87        | 9            | 7            | 60        |

## Grupo de estudio que padece la enfermedad

Se obtuvieron muestras de sangre de 269 pacientes con diagnóstico de insuficiencia cardíaca congestiva (ICC). La población incluyó a 78 mujeres y a 191 hombres. A continuación se muestran los datos estadísticos descriptivos y las clases funcionales de la New York Heart Association (NYHA). Cada laboratorio debe establecer un intervalo de referencia que represente la población de pacientes que se va a evaluar. Además, los laboratorios deben conocer la práctica actual de su centro para la evaluación de la ICC.

## Población con ICC – Todos

|               | < 55 años | 55 – 64 años | 65 – 74 años | ≥ 75 años |
|---------------|-----------|--------------|--------------|-----------|
| Media         | 6131.8    | 4455.5       | 6168.1       | 8142.7    |
| DE            | 13470.3   | 9296.0       | 10950.5      | 12699.1   |
| Mediana       | 1550.9    | 1639.5       | 2541.3       | 3780.5    |
| Percentil 95  | 28099.6   | 19481.5      | 17768.6      | 26923.1   |
| % > 125 pg/mL | 89 %      | 92 %         | 95 %         | -         |
| % > 450 pg/mL | -         | -            | -            | 94 %      |
| N             | 72        | 72           | 59           | 66        |

## Población con ICC – Hombres

|               | < 55 años | 55 – 64 años | 65 – 74 años | ≥ 75 años |
|---------------|-----------|--------------|--------------|-----------|
| Media         | 7771.4    | 4954         | 6537.2       | 8827.3    |
| DE            | 15797.2   | 10536.7      | 12383.9      | 12856.6   |
| Mediana       | 2526.1    | 1699.8       | 2541.3       | 5529.2    |
| Percentil 95  | 31237.1   | 19481.5      | 17768.6      | 18634.8   |
| % > 125 pg/mL | 94 %      | 94 %         | 93 %         | -         |
| % > 450 pg/mL | -         | -            | -            | 96 %      |
| N             | 48        | 51           | 43           | 49        |

## Población con ICC – Mujeres

|               | < 55 años | 55 – 64 años | 65 – 74 años | ≥ 75 años |
|---------------|-----------|--------------|--------------|-----------|
| Media         | 2852.6    | 3244.9       | 5176.1       | 6169.7    |
| DE            | 5774.0    | 5200.7       | 5727.8       | 12397.4   |
| Mediana       | 452.3     | 1516.9       | 2270.8       | 1125.3    |
| Percentil 95  | 15569.3   | 7903.1       | 16889.9      | 45824.4   |
| % > 125 pg/mL | 79 %      | 86 %         | 100 %        | -         |
| % > 450 pg/mL | -         | -            | -            | 88 %      |
| N             | 24        | 21           | 16           | 17        |

## Población con ICC – Todos

### Clase funcional de la NYHA

|                    | Todas las ICC | NYHA I  | NYHA II | NYHA III | NYHA IV |
|--------------------|---------------|---------|---------|----------|---------|
| Media              | 6184.5        | 3941.9  | 3648.8  | 6643.1   | 11089.2 |
| DE                 | 11737.8       | 8461.3  | 4897.0  | 13567.0  | 14428.2 |
| Mediana            | 2282.2        | 1161.0  | 1091.7  | 2541.3   | 4537.7  |
| Percentil 5        | 101.1         | 100.4   | 46.6    | 143.1    | 74.6    |
| Percentil 95       | 22331.9       | 14184.1 | 14238.5 | 17497.1  | 28099.6 |
| % mayor del límite | 92 %          | 93 %    | 90 %    | 94 %     | 88 %    |
| Mínimo             | 5.1           | 52.8    | 24.5    | 5.1      | 39.6    |
| Máximo             | 91446.4       | 52327.0 | 18634.8 | 91446.4  | 78045.2 |
| N                  | 269           | 45      | 60      | 124      | 40      |

## Población con ICC – Hombres

### Clase funcional de la NYHA

|                    | Todas las ICC | NYHA I  | NYHA II | NYHA III | NYHA IV |
|--------------------|---------------|---------|---------|----------|---------|
| Media              | 7012.1        | 4567.5  | 4402.2  | 7298.4   | 14351.2 |
| DE                 | 12991.9       | 9204.3  | 5167.4  | 14789.5  | 17258.9 |
| Mediana            | 3162.6        | 1639.5  | 2230.9  | 3442.2   | 6015.9  |
| Percentil 5        | 126.1         | 136.3   | 46.5    | 126.1    | 101.1   |
| Percentil 95       | 24004.7       | 19481.5 | 14238.5 | 17497.1  | 31237.1 |
| % mayor del límite | 94 %          | 97 %    | 93 %    | 95 %     | 91 %    |
| Mínimo             | 5.1           | 72.5    | 44.7    | 5.1      | 74.6    |
| Máximo             | 91446.4       | 52327.0 | 18634.8 | 91446.4  | 78045.2 |
| N                  | 191           | 37      | 40      | 91       | 23      |

## Población con ICC – Mujeres

### Clase funcional de la NYHA

|                    | Todas las ICC | NYHA I | NYHA II | NYHA III | NYHA IV |
|--------------------|---------------|--------|---------|----------|---------|
| Media              | 4157.8        | 1048.3 | 2142.1  | 4836.0   | 6676.0  |
| DE                 | 7561.7        | 1636.1 | 4008.9  | 9366.5   | 7864.9  |
| Mediana            | 950.2         | 225.4  | 705.3   | 1286.7   | 3780.5  |
| Percentil 5        | 84.3          | 52.8   | 24.5    | 143.1    | 39.6    |
| Percentil 95       | 22331.9       | 4960.2 | 11020.8 | 26923.1  | 22997.0 |
| % mayor del límite | 87 %          | 75 %   | 85 %    | 94 %     | 82 %    |
| Mínimo             | 24.5          | 52.8   | 24.5    | 126.8    | 39.6    |
| Máximo             | 45824.4       | 4960.2 | 15893.8 | 45824.4  | 22997.0 |
| N                  | 78            | 8      | 20      | 33       | 17      |

Estos resultados muestran que existe una relación entre la gravedad de los signos y síntomas clínicos de la ICC y la mediana de la concentración de NT-proBNP lo que demuestra que el método PBNP con el sistema Dimension Vista® puede utilizarse como ayuda en el diagnóstico de todos los grados de gravedad de la ICC, incluidos los pacientes asintomáticos.

### Interpretación de los resultados

La curva de características operativas del receptor (ROC) presenta la sensibilidad y especificidad clínicas en diversos valores límite para los 269 pacientes diagnosticados de ICC y los 318 sujetos sin ICC. A continuación se muestra la curva ROC para los análisis de PBNP con el sistema Dimension Vista®. El área bajo la curva ROC (AUC) para el análisis de NT-proBNP con el sistema Dimension Vista® es 0,928 con un intervalo de confianza del 95 % de 0.907 a 0.949.

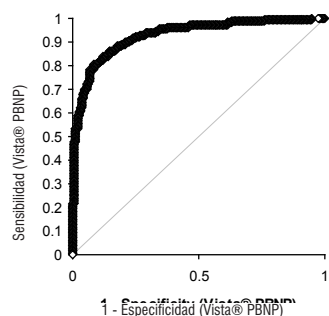

A continuación se muestra un diagrama de cajas y bigotes de la población del estudio clínico. Los umbrales clínicos recomendados son 125 pg/mL para los pacientes menores de 75 años y 450 pg/mL para los pacientes de 75 años o más. No se muestran en el gráfico seis muestras del grupo de enfermedad con valores por encima del intervalo del ensayo.

### Valores de PBNP de Vista® para los grupos de referencia y de enfermedad

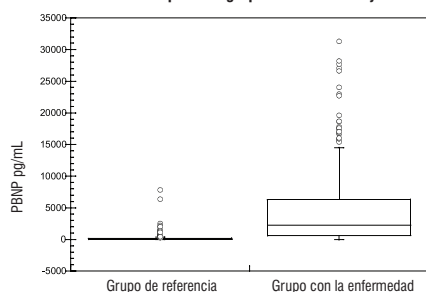

### Sensibilidad y especificidad en relación con la edad y el sexo

Las tablas que aparecen a continuación muestran la sensibilidad y la especificidad clínicas de los análisis de PBNP con el sistema Dimension Vista® utilizando un valor límite de 125 pg/mL para los pacientes menores de 75 años y 450 pg/mL para los pacientes de 75 años o más.

#### Hombres

|                                 | < 75 años      | ≥ 75 años    |
|---------------------------------|----------------|--------------|
| Sensibilidad                    | 94 % (133/142) | 96 % (47/49) |
| Intervalo de confianza del 95 % | 90 – 98        | 90 – 100     |
| Especificidad                   | 87 % (81/93)   | 73 % (45/62) |
| Intervalo de confianza del 95 % | 80 – 94        | 61 – 84      |

#### Mujeres

|                                 | < 75 años     | ≥ 75 años    |
|---------------------------------|---------------|--------------|
| Sensibilidad                    | 89 % (54/61)  | 88 % (15/17) |
| Intervalo de confianza del 95 % | 81 – 97       | 73 – 100     |
| Especificidad                   | 92 % (95/103) | 85 % (51/60) |
| Intervalo de confianza del 95 % | 87 – 97       | 76 – 94      |

### Análisis ROC ajustado en función de la edad

Se realizó un análisis ROC ajustado en función de la edad de los datos clínicos mediante el método ponderado descrito por Kondratovich (2002).<sup>28</sup> El AUC resultante es 0.929 con un intervalo de confianza del 95 % de 0.909 a 0.950.

## Características específicas de funcionamiento

Los siguientes datos representan el funcionamiento típico del sistema Dimension Vista®.

### Precisión<sup>29,c</sup>

| Material           | Media pg/mL | Desviación estándar (% CV) |                   |
|--------------------|-------------|----------------------------|-------------------|
|                    |             | Repetibilidad              | Intra-laboratorio |
| Mezcla de sueros 1 | 120         | 1.72 (1.4)                 | 2.06 (1.7)        |
| Mezcla de sueros 2 | 438         | 4.75 (1.1)                 | 4.75 (1.1)        |
| Mezcla de sueros 3 | 880         | 9.05 (1.0)                 | 12.24 (1.4)       |
| Mezcla de sueros 4 | 5075        | 69.06 (1.4)                | 91.97 (1.8)       |
| CC interno         | 32633       | 763.39 (2.3)               | 1140.27 (3.5)     |

c. Se utilizó la directriz EP5-A2 del CLSI/NCCLS. Durante 20 días se analizaron cada día dos ensayos independientes, con dos muestras de análisis para cada material de análisis.

### Comparación del método<sup>30,d</sup>

#### Equivalencia de suero y plasma

A continuación, se muestran los resultados de los análisis de comparación en el sistema Dimension Vista® de las muestras de plasma con heparina de litio, heparina de sodio y EDTA frente a las muestras de suero:

| Muestra comparativa | Pendiente | Intersección pg/mL | Coefficiente de correlación | n  |
|---------------------|-----------|--------------------|-----------------------------|----|
| Heparina de litio   | 1.01      | -2.0               | 0.9984                      | 53 |
| Heparina de sodio   | 1.00      | 4.8                | 0.9987                      | 57 |
| EDTA                | 1.00      | 0.5                | 0.9997                      | 59 |

d. El modelo de ecuación mediante la regresión de Passing-Bablok es: [resultados del sistema Dimension Vista®] = pendiente x [resultados en suero] + intersección.

### Estadística de regresión<sup>e</sup>

| Método comparativo                    | Pendiente | Intersección pg/mL | Coefficiente de correlación | n                |
|---------------------------------------|-----------|--------------------|-----------------------------|------------------|
| PBNP de Dimension Vista® (policlonal) | 1.02      | -3.2               | 0.996                       | 160 <sup>f</sup> |

e. Se utilizó la directriz EP9-A2 del CLSI/NCCLS. El método utilizado para ajustar la línea de regresión fueron los estadísticos de Passing-Bablok.

f. El intervalo de 160 valores en el estudio de correlación fue de 12 – 29519 pg/mL.

## Especificidad

### Interferencia HIL

Se evaluó la interferencia en el método PBNP de la hemoglobina, ictericia y lipemia (HIL) según la directriz EP7-A2 del CLSI/NCCLS.<sup>31</sup> La deriva es la diferencia en los resultados entre la muestra de control (sin el interferente) y la muestra analizada (que contiene el interferente) expresada en porcentaje. Se considera interferencia una deriva superior al 10 %.

| Sustancia analizada        | Concentración de la sustancia | NT-proBNP<br>pg/mL | Deriva*<br>(%) |
|----------------------------|-------------------------------|--------------------|----------------|
| Hemoglobina (hemolizada)   | Hemoglobina (monómero)        | 134                |                |
|                            |                               | 2044               | < 10           |
| Bilirrubina (no conjugada) | 60 mg/dL [1026 µmol/L]        | 132                |                |
|                            |                               | 2019               | < 10           |
| Bilirrubina (conjugada)    | 60 mg/dL [1026 µmol/L]        | 134                |                |
|                            |                               | 2066               | < 10           |
| Lipemia (Intralipid®)      | 3000 mg/dL [33.9 mmol/L]      | 131                |                |
|                            |                               | 2028               | < 10           |

Intralipid® es una marca registrada de Fresenius Kabi AG, Bad Homburg, Alemania.

\* Los resultados del análisis no deben corregirse en función de esta deriva.

g. Las unidades del Sistema Internacional de Unidades (derivadas) debidas a estas sustancias son inferiores al 10 % en la concentración de NT-proBNP de 135 y 2000 pg/mL.

### Sustancias que no causan interferencia

Las siguientes sustancias no interfieren con el método PBNP si están presentes en el suero en las concentraciones indicadas. Las inexactitudes (derivadas) debidas a estas sustancias son inferiores al 10 % en la concentración de NT-proBNP de 135 y 2000 pg/mL.

| Compuesto                | Concentración | Unidades SI  |
|--------------------------|---------------|--------------|
| Abciximab                | 21 µg/mL      | 441 µmol/L   |
| Acetaminofeno            | 0.025 mg/dL   | 1.66 µmol/L  |
| Alopurinol               | 2.5 mg/dL     | 184 µmol/L   |
| Amicacina                | 15 mg/dL      | 256 µmol/L   |
| Amiodarona               | 20 µg/mL      | 31 µmol/L    |
| Besilato de amlodipina   | 4 µg/mL       | 7.1 µmol/L   |
| Ampicilina               | 5.3 mg/dL     | 152 µmol/L   |
| Ácido ascórbico          | 5 mg/dL       | 227 µmol/L   |
| Atenolol                 | 1.0 mg/dL     | 37.6 µmol/L  |
| Atorvastatina            | 32 mg/dL      | 26.5 µmol/L  |
| Cafeína                  | 6 mg/dL       | 308 µmol/L   |
| Captopril                | 5.0 mg/dL     | 230 µmol/L   |
| Carbamazepina            | 3 mg/dL       | 127 µmol/L   |
| Cloranfenicol            | 5 mg/dL       | 155 µmol/L   |
| Clordiazepóxido          | 1 mg/dL       | 33.3 µmol/L  |
| Clorpromazina            | 0.2 mg/dL     | 6.27 µmol/L  |
| Colesterol               | 500 mg/dL     | 12.9 mmol/L  |
| Cimetidina               | 2 mg/dL       | 79.2 µmol/L  |
| Cinarizina               | 3.0 mg/dL     | 81.4 µmol/L  |
| Bisulfato de clopidogrel | 30 µg/mL      | 71.4 µmol/L  |
| Creatinina               | 30 mg/dL      | 2652 µmol/L  |
| Ciclosporina A           | 4000 ng/mL    | 3.3 µmol/L   |
| Dextrano 40              | 6000 mg/dL    | 1500 µmol/L  |
| Diazepam                 | 0.5 mg/dL     | 17.6 µmol/L  |
| Diclofenac               | 60 µg/mL      | 188.6 µmol/L |
| Digitoxina               | 60 ng/mL      | 78.6 nmol/L  |
| Digoxina                 | 5 ng/mL       | 6.15 nmol/L  |
| Diltiazem                | 120 µg/mL     | 266.1 µmol/L |
| Dipiridamol              | 30 µg/mL      | 59.4 µmol/L  |
| Disopiramida             | 40 µg/mL      | 117 µmol/L   |
| Dopamina                 | 65 mg/dL      | 3.4 mmol/L   |
| Maleato de enalapril     | 16 µg/mL      | 32.5 µmol/L  |
| Eritromicina             | 6 mg/dL       | 81.6 µmol/L  |
| Etanol                   | 400 mg/dL     | 86.8 mmol/L  |
| Etosuximida              | 25 mg/dL      | 1770 µmol/L  |
| Furosemida               | 6 mg/dL       | 181 µmol/L   |
| Gentamicina              | 12 mg/dL      | 251 µmol/L   |
| Heparina                 | 3 U/mL        | 3000 U/L     |
| Hidralazina              | 20 µg/mL      | 101.7 µmol/L |
| Hidroclorotiazida        | 20 µg/mL      | 67.2 µmol/L  |
| Ibuprofeno               | 50 mg/dL      | 2425 µmol/L  |
| Inmunoglobulina G (IgG)  | 5 g/dL        | 50 g/L       |
| Indometacina             | 16 µg/mL      | 36.9 µmol/L  |
| Dinitrato de isosorbida  | 6.0 mg/dL     | 254 µmol/L   |
| Lidocaina                | 1.2 mg/dL     | 51.2 µmol/L  |
| Lisinopril               | 16 µg/mL      | 36.2 µmol/L  |
| Litio                    | 2.3 mg/dL     | 3.2 mmol/L   |
| Lovastatina              | 16 µg/mL      | 39.6 µmol/L  |
| L-tiroxina               | 60 µg/dL      | 0.77 µmol/L  |
| Metildopa                | 2.5 mg/dL     | 118 µmol/L   |
| Lactato de milrinona     | 2.4 µg/mL     | 11.4 µmol/L  |
| Nicotina                 | 0.1 mg/dL     | 6.2 µmol/L   |
| Nifedipina               | 6.0 mg/dL     | 173 µmol/L   |
| Nitrofurantoina          | 40 µg/mL      | 168 µmol/L   |
| Nitroglicerina           | 0.16 µg/mL    | 0.577 µmol/L |
| Oxazepam                 | 12 µg/mL      | 41.8 µmol/L  |
| Oxitetraciclina          | 100 µg/mL     | 217.2 µmol/L |
| Penicilina G             | 25 U/mL       | 25000 U/L    |
| Pentobarbital            | 8 mg/dL       | 354 µmol/L   |
| Fenobarbital             | 10 mg/dL      | 431 µmol/L   |
| Fenitoína                | 5 mg/dL       | 198 µmol/L   |
| Primidona                | 4 mg/dL       | 183 µmol/L   |
| Probenecid               | 200 µg/mL     | 700.9 µmol/L |
| Propoxifeno              | 0.2 mg/dL     | 4.91 µmol/L  |
| Propranolol              | 0.15 mg/dL    | 5.1 µmol/L   |

## Compuesto

| Compuesto          | Concentración | Unidades SI   |
|--------------------|---------------|---------------|
| Proteína: Albúmina | 6 g/dL        | 60 g/L        |
| Proteína: Total    | 11.1 g/dL     | 111 g/L       |
| Quinidina          | 20 µg/mL      | 61.6 µmol/L   |
| Factor reumatoide  | 500 IU/mL     | 500 IU/mL     |
| Ácido salicílico   | 60 mg/dL      | 4.34 mmol/L   |
| Simvastatina       | 32 µg/mL      | 76.5 µmol/L   |
| Sulfametoxazol     | 320 µg/mL     | 1263.3 µmol/L |
| Teofilina          | 4 mg/dL       | 222 µmol/L    |
| Trimetoprima       | 64 µg/mL      | 220.7 µmol/L  |
| Urea               | 500 mg/dL     | 83.3 mmol/L   |
| Ácido úrico        | 20 mg/dL      | 1190 µmol/L   |
| Ácido valproico    | 50 mg/dL      | 3467 µmol/L   |
| Verapamilo         | 16 mg/dL      | 0.33 µmol/L   |
| Warfarina          | 4 µg/mL       | 130 µmol/L    |

## Efecto de saturación

Los inmunoensayos sándwich de un paso son susceptibles a un efecto de saturación (hook effect) a concentraciones altas, en el cual un exceso de antígeno impide la unión simultánea de los antígenos de captura y detección a una única molécula de analito.<sup>32</sup> Estas muestras deben diluirse y volver a analizarse antes de registrar los resultados. El método PBNP no muestra ningún efecto de saturación hasta 400.000 pg/mL.

## Reactividad cruzada

Las siguientes sustancias no tienen una reactividad cruzada significativa (inferior al 1 %) en las concentraciones indicadas cuando se añaden a muestras que contienen 0 y aproximadamente 125 pg/mL de NT-proBNP:

| Sustancia                                                  | Concentración |
|------------------------------------------------------------|---------------|
| PNA <sub>28</sub>                                          | 3.1 µg/mL     |
| proPNA-NT <sub>1-30</sub> (preproPNA <sub>26-55</sub> )    | 3.5 µg/mL     |
| proPNA-NT <sub>31-67</sub> (preproPNA <sub>56-92</sub> )   | 1.0 ng/mL     |
| proPNA-NT <sub>79-98</sub> (preproPNA <sub>104-123</sub> ) | 1.0 ng/mL     |
| PNC <sub>32</sub> (Natrecor®)                              | 3.5 µg/mL     |
| PNC <sub>32</sub>                                          | 2.2 µg/mL     |
| PND                                                        | 1.0 ng/mL     |
| PNV                                                        | 1.0 ng/mL     |
| Adrenomedulina                                             | 1.0 ng/mL     |
| Aldosterona                                                | 0.6 ng/mL     |
| Angiotensina I                                             | 0.6 ng/mL     |
| Angiotensina II                                            | 0.6 ng/mL     |
| Angiotensina III                                           | 1.0 ng/mL     |
| Endotelina                                                 | 20 pg/mL      |
| Renina                                                     | 50 ng/mL      |
| Urodilatina                                                | 3.5 µg/mL     |
| Arg-vasopresina                                            | 1.0 ng/mL     |

## Sensibilidad analítica: ≤ 5 pg/mL

La sensibilidad analítica del método PBNP es ≤ 5 pg/mL. La sensibilidad analítica se define como la concentración en dos desviaciones estándar (n=20) por encima de una muestra sin NT-proBNP, como el calibrador de nivel 1 de PBNP (0 pg/mL).

## Límite de detección: 0.8 pg/mL

El límite de detección (LoD) del ANALITO es 0.8 pg/mL, determinado de acuerdo con la directriz EP17-A del CLSI y con proporciones de falsos positivos (α) inferiores al 5 % y falsos negativos (β) inferiores al 5 %; basado en 60 determinaciones, con 5 muestras en blanco y 5 de bajo nivel. El LOD es la concentración mínima que se puede detectar de manera fiable.

## Sensibilidad funcional: Evaluación del límite de CV del 20 %

La sensibilidad funcional se evaluó mediante la determinación de la imprecisión total de las muestras de NT-proBNP natural en suero. La imprecisión total se midió mediante un estudio ANOVA de dos réplicas diarias durante veinte días. La sensibilidad funcional (perfil de imprecisión) del método PBNP de Dimension Vista® corresponde a un coeficiente de variación (CV) de 20 % para un nivel de NT-proBNP ≤ 30 pg/mL.

## Linealidad de la dilución

Se diluyó en el intervalo del ensayo una muestra de plasma de paciente con una elevada concentración de NT-proBNP. Se diluyeron linealmente muestras adicionales de plasma para confirmar la exactitud de la dilución en el extremo inferior del intervalo del ensayo. Todas las muestras se diluyeron con mezclas de plasmas de pacientes con niveles bajos. La tabla siguiente resume los resultados de estos estudios:

|                                 | Muestra A | Muestra B |
|---------------------------------|-----------|-----------|
| Concentración inicial (pg/mL)   | 41812     | 1266      |
| <b>Estadística de regresión</b> |           |           |
| Pendiente                       | 1.004     | 1.003     |
| Intersección                    | -55.8     | -3.5      |
| Coefficiente de correlación     | 0.999     | 0.999     |
| N                               | 5         | 5         |
| <b>% de recuperación</b>        |           |           |
| Promedio                        | 99.9      | 99.5      |
| Intervalo                       | 98 – 101  | 98 – 100  |

Fabricado bajo licencia de Roche Diagnostics.

US 5786163 y equivalentes extranjeras

Solicitud de patente de Estados Unidos: 09/890442 y equivalentes extranjeras

**Clave de los símbolos:** Véase el panel adyacente.

**Bibliografía:** Véase el panel adyacente.

Dimension Vista®, LOCI®, Dimension® y Flex® son marcas comerciales de Siemens Healthcare Diagnostics.

©2008 Siemens Healthcare Diagnostics

Reservados todos los derechos.

**Bibliography / Literatur / Bibliographie / Bibliografia / Bibliografía:**

1. Remme WJ, Swedberg K. Guidelines for the diagnosis and treatment of chronic heart failure, Task Force for the Diagnosis and Treatment of Chronic Heart Failure, European Society of Cardiology. Eur Heart J 2001; 22: 1527- 1560.
2. Richards AM, Nicholls GM, Yandle TG, Frampton C, Espiner EA, Turner JG, et al. Plasma N-terminal pro-brain natriuretic peptide and adrenomedullin: New neurohormonal predictors of left ventricular function and prognosis after myocardial infarction. Circulation 1998; 97: 1921 – 1929.
3. de Bold AJ. Atrial natriuretic factor: A hormone produced by the heart. Science 1985; 230:767 – 770.
4. Valli N, Gobinet A, Bordernave L. Review of 10 years of the clinical use of brain natriuretic peptide in cardiology. J Lab Clin Med 1999; 134: 437-444.
5. de Bold AJ, Boerenstein HB, Varess AT, Sonnenberg H. A rapid and potent natriuretic response to intravenous injection of atrial extracts in rats. Life Sci 1981; 28: 89-94.
6. Epstein M, Loutzenhiser R, Friedland E, Aceto RM, Camargo MJF, Atlas SA. Relationship of increased plasma natriuretic factor and renal sodium handling during immersion-induced central hypervolemia in normal humans. J Clin Invest 1987; 79: 738-745.
7. Struthers AD. How to use natriuretic peptide levels for diagnosis and prognosis. The European Society of Cardiology. Eur Heart J 1999;20:1374-1375.
8. Hunt PJ, Richards AM, Nicholls MG, Yandle TG, Doughty RN, Espiner EA. Immunoreactive aminoterminal pro-brain natriuretic peptide (NT-proBNP): A new marker for cardiac impairment. Clin Endocrinol 1997; 47:287-296.
9. Talwar S, Squire IB, Davies JE, Barnett DB, Ng LL. Plasma N-terminal pro-brain natriuretic peptide and the ECG in the assessment of left ventricular systolic dysfunction in a high risk population. Eur Heart J 1999; 20: 1736-1744.
10. Darbar D, Davidson NC, Gillespie N, Choy A-MJ, Lang CC, Shyr Y, et al. Diagnostic value of B-type natriuretic peptide concentrations in patients with acute myocardial infarction. A J Cardiol 1996; 78: 284-287.
11. McDonagh TA, Robb SD, Murdoch DR, Morton JJ, Ford I, Morrison CE, et al. Biochemical detection of left-ventricular systolic dysfunction. Lancet 1998; 351: 9-13.
12. Fisher C et al. NT-proBNP predicts prognosis in patients with chronic heart failure. Heart 2003; 89:879-881.
13. James SK et al. NT-proBNP and other risk markers for the separate prediction of mortality and subsequent myocardial infarction in patients with unstable coronary artery disease. GUSTO IV Substudy. Circulation 2003; 108:275-281.
14. Talwar S, Squire I, Downie P, Davies J, Ng LL. Plasma N-terminal pro-brain natriuretic peptide and cardiotrophin 1 are raised in unstable angina. Heart 2000; 84: 421-424.
15. Jernberg T, Stridsberg M, Venge P, Lindahl B. N-Terminal pro-brain natriuretic peptide on admission for early risk stratification of patients with chest pain and no ST-segment elevation. J Am Coll Cardiol 2002; 40: 437-445.
16. Zeller M, Cottin Y, Laurent Y, Danchin N, L'Huillier I, et al. N-Terminal pro-brain natriuretic peptide levels in patients with non-ST-elevation myocardial infarction. Cardiology 2004; 102: 37-40.
17. Richards AM, Nicholls MG, Espiner E, Lainchbury J, et al. B-type natriuretic peptides and ejection fraction for prognosis after myocardial infarction. Circulation 2003; 107: 2786-2792.
18. Ullman EF, Kirakossian H, Switchenko AC, Ishkanian J, et al. Luminescent oxygen channeling assay (LOCI™): sensitive, broadly applicable homogeneous immunoassay method. Clin Chem 42:9 1996, 1518-1526.
19. Ullman EF, Kirakossian H, Sharat S, Ping Wu Z, Irvin BR, et al. Luminescent oxygen channeling immunoassay: Measurement of particle binding kinetics by chemiluminescence. Proc.Natl.Acad.Sci. USA, Vol 91, pp.5426-5430, June 1994 Biochemistry.
20. Ullman EF. Homogeneous Immunoassays, The Immunoassay Handbook, 2<sup>nd</sup> ed., David Wild editor, 2001 192-194.
21. Burtis CA, Ashwood ER, Bruns DE. Tietz Textbook of Clinical Chemistry and Molecular Biology, Fourth Edition, Elsevier Saunders, St. Louis, MO 2006; pp. 41-58 (specimen collection).
22. Clinical and Laboratory Standards Institute/NCCLS. *Procedures for the Collection of Diagnostic Blood Specimens by Venipuncture; Approved Standard-Fifth Edition*. CLSI/NCCLS document H3-A5 [ISBN 1-56238-515-1]. CLSI, 940 West Valley Road, Suite 1400, Wayne, PA 19087-1898 USA, 2003.
23. Clinical and Laboratory Standards Institute/NCCLS. *Tubes and Additives for Venous Blood Specimen Collection; Approved Standard – Fifth Edition*. CLSI/NCCLS document H1-A5 [ISBN 1-56238-519-4]. CLSI, 940 West Valley Road, Suite 1400, Wayne, PA 19087-1898 USA, 2003.
24. Clinical and Laboratory Standards Institute/NCCLS. *Procedures for the Handling and Processing of Blood Specimens; Approved Guideline – Third Edition*. CLSI/NCCLS document H18-A3 [ISBN 1-56238-555-0]. CLSI, 940 West Valley Road, Suite 1400, Wayne, PA 19087-1898 USA, 2004.
25. Elecsys® proBNP Assay Package Insert Sheet, Roche Diagnostics GmbH, December 2003.
26. Vaidya HC, Beatty BG. Eliminating interference from heterophilic antibodies in a two-site immunoassay for creatine kinase MB by using F(ab')<sub>2</sub> conjugate and polyclonal mouse IgG. Clin Chem 1992; 38: 1737-1742.
27. Kricka LJ. Human Anti-Animal Antibody Interferences in Immunological Assays. Clin Chem 1999; 45:7; 942-956.
28. Kondratovich, M (2002). Matched Receiver Operating Characteristic (ROC) analysis and propensity scores. Proceedings of the 2002 Joint Statistical Meeting, Biopharmaceutical Section, New York, NY.
29. Clinical and Laboratory Standards Institute/NCCLS. *Evaluation of Precision Performance of Quantitative Measurement Methods; Approved Guideline- Second Edition*. CLSI/NCCLS document EP5-A2 [ISBN 1-56238-542-9]. CLSI, 940 West Valley Road, Suite 1400, Wayne, PA, 19087-1898 USA, 2004.
30. Clinical and Laboratory Standards Institute/NCCLS. *Method Comparison and Bias Estimation Using Patient Samples; Approved Guideline- Second Edition*. CLSI/NCCLS document EP9-A2 [ISBN 1-56238-472-4]. CLSI, 940 West Valley Road, Suite 1400, Wayne, PA 19087-1898 USA, 2002.
31. Clinical and Laboratory Standards Institute/NCCLS. *Interference Testing in Clinical Chemistry; Approved Guideline – Second Edition*. CLSI/NCCLS document EP7-A2 [ISBN 1-56238-584-4]. CLSI, 940 West Valley Road, Suite 1400, Wayne, PA 19087-1898 USA, 2005.
32. Ryall RG, Story CJ, and Turner DR. Reappraisal of the causes of the "hook effect" in two-site immunoradiometric assays. Anal Biochem 982; 127: 308 – 315.

**Symbols Key  
Symbolschlüssel  
Explication des Symboles  
Interpretazione simboli  
Clave de los Símbolos**

|  |                                                                                                                                                                                                                                           |
|--|-------------------------------------------------------------------------------------------------------------------------------------------------------------------------------------------------------------------------------------------|
|  | Do not reuse / Nicht zur Wiederverwendung / Ne pas réutiliser / Non riutilizzare / No reutilizar                                                                                                                                          |
|  | Use By / Verwendbar bis / Utiliser jusque / Utilizzare entro / Fecha de caducidad                                                                                                                                                         |
|  | Batch Code / Chargenbezeichnung / Code du lot / Codice del lotto / Código de lote                                                                                                                                                         |
|  | Catalogue Number / Bestellnummer / Référence du catalogue / Numero di catalogo / Número de catálogo                                                                                                                                       |
|  | Caution, consult accompanying documents / Achtung, Begleiddokumente beachten / Attention voir notice d'instructions / Attenzione, vedere le istruzioni per l'uso / Atención, ver instrucciones de uso                                     |
|  | Manufacturer / Hersteller / Fabricant / Fabbicante / Fabricante                                                                                                                                                                           |
|  | Authorized Representative in the European Community / Bevollmächtigter in der Europäischen Gemeinschaft / Mandataire dans la Communauté européenne / Mandatario nella Comunità Europea / Representante autorizado en la Comunidad Europea |
|  | Contains sufficient for <n> tests / Inhalt ausreichend für <n> Tests / Contenu suffisant pour "n" tests / Contenuto sufficiente per "n" saggi / Contenido suficiente para <n> ensayos                                                     |
|  | In Vitro Diagnostic Medical Device / In-Vitro-Diagnostikum / Dispositif médical de diagnostic in vitro / Dispositivo medico-diagnostico in vitro / Producto sanitario para diagnóstico in vitro                                           |
|  | Temperature Limitation / Temperaturbegrenzung / Limites de température / Limiti di temperatura / Limite de temperatura                                                                                                                    |
|  | Consult Instructions for Use / Gebrauchsanweisung beachten / Consulter les instructions d'utilisation / Consultare le istruzioni per l'uso / Consulte las instrucciones de uso                                                            |
|  | Non-sterile / Nicht steril / Non stérile / Non sterile / No estéril                                                                                                                                                                       |
|  | CE Mark / CE Zeichen / Marquage CE / Marchio CE / Marca CE                                                                                                                                                                                |
|  | Contents / Inhalt / Contenu / Contenuto / Contenido                                                                                                                                                                                       |
|  | Reconstitution Volume / Rekonstitutionsvolumen / Volume de reconstitution / Volume di ricostituzione / Volumen de reconstitución                                                                                                          |
|  | Level / Konzentration / Niveau / Livello / Nivel                                                                                                                                                                                          |

2014-10\_EFRS

Made in: USA  
Siemens Healthcare Diagnostics Inc.  
500 GBC Drive  
Newark, DE 19714 U.S.A.  
[siemens.com/healthcare](http://siemens.com/healthcare)

**Siemens Healthcare Diagnostics Ltd.**  
Sir William Siemens Sq.  
Frimley, Camberley, UK GU16 8QD

**Global Siemens  
Headquarters**  
Siemens AG  
Wittelsbacherplatz 2  
80333 Muenchen  
Germany

**Global Siemens  
Healthcare Headquarters**  
Siemens AG  
Healthcare  
Henkestrasse 127  
91052 Erlangen  
Germany  
Phone: +49 9131 84-0  
[siemens.com/healthcare](http://siemens.com/healthcare)

**Global Division**  
Siemens Healthcare  
Diagnostics Inc.  
511 Benedict Avenue  
Tarrytown, NY 10591-5097  
USA  
[siemens.com/healthcare](http://siemens.com/healthcare)

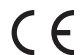

Supplement: NIHMS1602058-supplement-Supplement_Material_SM2.pdf [file NIHMS1602058-supplement-Supplement_Material_SM2.pdf]
