# Supplementary material
Source: PubMed Central journal article supplement (PMC7388686)
Supplement: NIHMS1602058-supplement-Supplement_Material_SM3.pdf [file NIHMS1602058-supplement-Supplement_Material_SM3.pdf]

**DADE BEHRING**  
Dimension Vista® System  
**Flex® reagent cartridge**

REF K7046

**hsCRP**

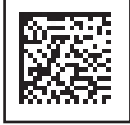

K7046G00E0841 2008-02

# DADE BEHRING

## Dimension Vista<sup>®</sup> System

### Flex<sup>®</sup> reagent cartridge

### hsCRP

Issue Date 2008-02

#### CardioPhase<sup>®</sup> high sensitivity CRP

**Intended Use:** The CardioPhase<sup>®</sup> high sensitivity CRP (hsCRP) method is an *in vitro* diagnostic test for the quantitative measurement of C-reactive protein (CRP) in human serum and heparinized plasma on the Dimension Vista<sup>®</sup> System.

High sensitivity CRP measurements may be used for evaluation of conditions thought to be associated with inflammation, in otherwise healthy individuals and as an independent risk marker for the identification and stratification of individuals at risk for future cardiovascular disease\*. Measurements of hsCRP, when used in conjunction with traditional clinical laboratory evaluation of acute coronary syndromes, may be useful as an independent marker of prognosis for recurrent events, in patients with stable coronary disease or acute coronary syndromes.

**Summary:** CRP is one of the 'acute-phase' proteins, the serum or plasma levels of which rise during general, nonspecific response to infectious and non-infectious inflammatory processes. CRP is synthesized in the liver and is normally present as a trace constituent of serum or plasma.

In various disease states resulting in tissue injury, infection or acute inflammation, CRP values may rise above normal to 20 to 500 mg/L<sup>1</sup>. As elevated CRP values are always associated with pathological changes, the CRP method provides useful information for the diagnosis, therapy and monitoring of inflammatory processes and associated diseases<sup>3,4</sup>. Increases in CRP values are non-specific and should not be interpreted without a complete clinical history. Studies have shown that measurement of CRP by high sensitivity methods is a strong independent predictor of risk for future cardiovascular and peripheral vascular disease<sup>5</sup>. High sensitivity CRP measurements have also been shown to add to the predictive value of other markers used to assess the risk of cardiovascular and peripheral vascular disease<sup>6,7,8</sup>. Elevated CRP values determined by high sensitivity CRP methods may be indicative of the prognosis of individuals with acute coronary syndromes, and may be useful in the management of such individuals<sup>5</sup>.

**Principles of Procedure:** Polystyrene particles coated with monoclonal antibodies specific to human CRP are aggregated when mixed with samples containing CRP. These aggregates scatter a beam of light passed through the sample. The intensity of the scattered light is proportional to the concentration of the respective protein in the sample. The result is evaluated by comparison with a standard of known concentration.

#### Reagents

| Wells <sup>a,b</sup> | Form   | Ingredient                                                                       | Concentration <sup>c</sup> | Source |
|----------------------|--------|----------------------------------------------------------------------------------|----------------------------|--------|
| 1 - 8                | Liquid | hsCRP Supplement Reagent:<br>Phosphate buffer;<br>Polidocanol                    | 1.9 g/L                    |        |
| 9 - 12               | Liquid | High sensitivity CRP Reagent:<br>Polystyrene particles;<br>Monoclonal antibodies | 1 g/L<br>13 mg/L           | Mouse  |

a) Wells are numbered consecutively from the wide end of the cartridge.

b) Contain preservatives.

c) Nominal value per well in a cartridge.

#### Precautions:

Contains sodium azide (< 0.1 %) as a preservative. Sodium azide can react with copper or lead pipes in drain lines to form explosive compounds. Dispose of properly in accordance with local regulations.

Contains human source material.

Each donor or donor unit was tested and found to be negative for human immunodeficiency virus (HIV) 1 and 2, hepatitis B virus (HBV) and hepatitis C virus (HCV) using either tests found to be in conformance with the In Vitro Diagnostic Directive in the EU or FDA approved tests. Because no known test can offer complete assurance of the absence of infectious agents, all human derived products should be handled with appropriate caution.

Used cuvettes contain human body fluids; handle with appropriate care to avoid skin contact or ingestion.

For *in vitro* diagnostic use.

#### Reagent Preparation:

All reagents are liquid and ready to use.

**Store at:** 2 - 8 °C.

**Expiration:** Refer to carton for expiration date of individual unopened reagent cartridges. Sealed wells on the instrument are stable for 90 days.

**Open well stability:** 21 days for wells 1 - 12

#### Specimen Collection and Handling:

Recommended specimen types: serum or heparinized plasma.

Serum and plasma can be collected using recommended procedures for collection of diagnostic blood specimens by venipuncture<sup>9</sup>.

Follow the instructions provided with your specimen collection device for use and processing<sup>10</sup>.

For serum, complete clot formation should take place before centrifugation. Serum or plasma should be physically separated from cells as soon as possible with a maximum limit of two hours from the time of collection<sup>11</sup>.

Samples should be as fresh as possible (stored for no more than seven days at 2 - 8 °C) or stored frozen. Samples can be stored at below -20 °C for up to eight months<sup>12</sup>, if they are frozen within 24 hours after collection and if repeated freeze-thaw cycles are avoided. Lipemic or frozen samples, which become turbid after thawing, must be clarified by centrifugation (10 minutes at approximately 15,000 x g) prior to testing. Specimens should be free of particulate matter.

#### Procedure

##### Materials Provided

CardioPhase<sup>®</sup> hsCRP Flex<sup>®</sup> reagent cartridge, Cat. No. K7046

##### Materials Required But Not Provided

PROT2 CAL, Cat. No. KC780  
System Diluent, Cat. No. KS804  
Quality Control material, such as:  
hsCRP CON L, Cat. No. KC755  
hsCRP CON H, Cat. No. KC757

##### Test Steps

Sampling, reagent delivery, mixing, and processing are automatically performed by the Dimension Vista<sup>®</sup> System. For details of this processing, refer to your Dimension Vista<sup>®</sup> Operator's Guide.

|                                          | Test Conditions           |
|------------------------------------------|---------------------------|
| Initial Sample Dilution                  | 1:1 (neat)                |
| Sample Volume (delivered to the cuvette) | <b>Cuvette</b><br>1.37 µL |
| Diluent Volume                           | 118 µL                    |
| High Sensitivity CRP Reagent             | 27.3 µL                   |
| Temperature                              | 37.0 °C                   |
| Reaction time                            | 5 minutes 50 seconds      |
| Wavelength                               | 840 nm                    |
| Type of Measurement                      | Nephelometric             |

|                            | Calibration                                                                                          |
|----------------------------|------------------------------------------------------------------------------------------------------|
| Calibration Material       | PROT2 CAL, Cat. No. KC780                                                                            |
| Calibration Scheme         | 7 levels, n = 3                                                                                      |
| Units                      | mg/dL [mg/L] <sup>a</sup><br>(mg/dL x 0.1) = [mg/L]                                                  |
| Typical Calibration Levels | 0.012, 0.025, 0.056, 0.111, 0.222, 0.50, 1.0 mg/dL<br>[0.12, 0.25, 0.56, 1.11, 2.22, 5.0, 10.0 mg/L] |

To obtain calibrator levels that span the measuring range, PROT2 CAL is diluted automatically with System Diluent by the instrument to the following dilutions:

|                                                                                      |                               |
|--------------------------------------------------------------------------------------|-------------------------------|
| Level 1: 1:162 dilution                                                              |                               |
| Level 2: 1:81 dilution                                                               |                               |
| Level 3: 1:36 dilution                                                               |                               |
| Level 4: 1:18 dilution                                                               |                               |
| Level 5: 1:9 dilution                                                                |                               |
| Level 6: 1:4 dilution                                                                |                               |
| Level 7: 1:2 dilution                                                                |                               |
| Calibration Frequency                                                                | Every 45 days for any one lot |
| Calibration interval may be extended based on acceptable verification of calibration |                               |

A new calibration is required:

- For each new lot of Flex<sup>®</sup> reagent cartridges
- After major maintenance or service, if indicated by quality control results
- As indicated in laboratory quality control procedures
- When required by government regulations

d) Système International d'Unités [SI Units] are in brackets.

#### Quality Control

At least once each day of use, analyze a minimum of two levels of a Quality Control (QC) material with known C-reactive protein concentrations, e. g. hsCRP CON L or H.

Follow your laboratory internal QC procedures if the results obtained are outside acceptable limits.

**Results:** The instrument calculates the concentration of C-reactive protein in mg/dL [mg/L] using the calculation scheme described in your Dimension Vista<sup>®</sup> Operator's Guide.

**Results of this test should always be interpreted in conjunction with the patient's medical history, clinical presentation and other findings.**

**Analytical Measurement Range (AMR): 0.016 - 0.95 mg/dL [0.16 - 9.50 mg/L]**

This is the measuring range for undiluted samples that are automatically processed by the instrument. If the readings obtained are outside the initial measuring range, the method can be repeated using a higher dilution of the sample.

Refer to your Dimension Vista<sup>®</sup> Operator's Guide for information on repeat measurements using other dilutions.

- Samples with results in excess of 0.95 mg/dL [9.50 mg/L] can be repeated on a higher dilution.
- Samples with results less than 0.016 mg/dL [0.16 mg/L] will be reported as "less than 0.016 mg/dL" by the instrument.

#### Limitations of Procedure

Turbidity and particles in the samples may interfere with the determination. Therefore, samples containing particles must be centrifuged prior to testing. Lipemic or turbid samples, which cannot be clarified by centrifugation (10 minutes at approximately 15,000 x g), must not be used.

Due to matrix effects, inter-laboratory survey samples and control samples may yield results that differ from those obtained with other methods. It may therefore be necessary to assess these results in relation to method-specific target values.

The instrument reporting system contains flags and comments to provide the user with information regarding instrument processing errors, instrument status information and potential errors in CardioPhase<sup>®</sup> hsCRP results. Refer to your Dimension Vista<sup>®</sup> Operator's Guide for the meaning of report flags and comments. Any report containing flags and/or comments should be addressed according to your laboratory's procedure manual and not reported. Patient samples may contain heterophilic antibodies that could react in immunoassays to give falsely elevated or depressed results. This method has been designed to minimize interference from heterophilic antibodies<sup>13</sup>. Nevertheless, complete elimination of this interference from all patient specimens cannot be guaranteed. A test result that is inconsistent with the clinical picture and patient history should be interpreted with caution.

#### AHA/CDC Expert Panel Recommendations<sup>14</sup>:

The AHA/CDC Expert Panel has the following recommendations for limitations on the use of hsCRP assays:

- hsCRP levels should not be substituted for assessment of traditional cardiovascular risk factors.
- Application of management guidelines for acute coronary syndromes should not be dependent on hsCRP levels.
- When using the assay for risk assessment, patients with persistently unexplained, marked elevation of hsCRP (> 10 mg/L) after repeated testing should be evaluated for non-cardiovascular etiologies.
- The expert panel recommends against screening of the entire adult population for hsCRP as a public health measure.
- Patients with evidence of active infection, systemic inflammatory processes or trauma should not be tested for cardiovascular disease risk assessment until these conditions have abated.
- Application of secondary prevention measures should not depend on hsCRP determination, but rather an array of risk factors (global risk assessment).
- Serial measurements of hsCRP should not be used to monitor effects of treatment.
- Two separate hsCRP measurements (optimally two weeks apart) should be obtained before performing risk assessment, due to within-subject hsCRP variability.

**Interpretation of Results**

Recent medical events resulting in tissue injury, infection or inflammation, which may cause elevated CRP levels should also be considered when interpreting results.

**Cardiovascular and Peripheral Vascular Disease**

**Risk Assessment:**

Several studies have examined the utility of hsCRP measurements for cardiovascular disease risk prediction. In a subset consisting of 280 individuals participating in the Physician's Health Study, baseline samples were tested for a number of biomarkers, including hsCRP. The population was followed for nine years to assess the development of peripheral arterial disease (PAD). The following graph shows the relative risk (95 % confidence interval) of developing future PAD as a function of quartile of hsCRP<sup>13</sup>.

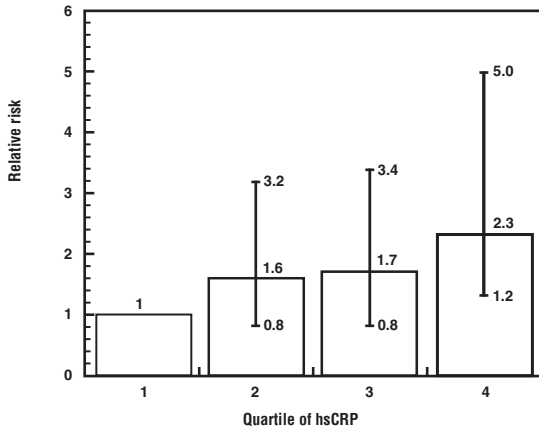

The AHA/CDC Scientific Statement<sup>6</sup> provides the following risk assessment guidelines:

| Risk    | hsCRP (mg/L) |
|---------|--------------|
| Low     | < 1.0        |
| Average | 1.0 - 3.0    |
| High    | > 3.0        |

**Risk Stratification:**

For patients with acute coronary syndromes, measurement of hsCRP may provide prognostic information. A value of CRP >10 mg/L in the early period (6 - 24 hours after onset of symptoms), has been shown to be indicative of an increased risk for short term (30 days - 1 year) recurrent cardiac events<sup>5</sup>.

A sub-study of 447 patients in the CAPTURE trial examined the clinical implications of elevated levels of CRP for risk stratification in patients with unstable angina. As shown in the following graph, patients with a CRP >10 mg/L experienced a higher event rate (mortality or MI) than patients with a CRP <10 mg/L<sup>14</sup>.

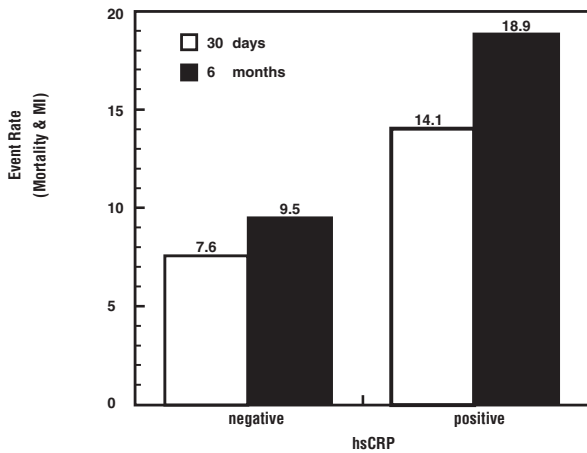

**Expected Values: less than 0.30 mg/dL [3.00 mg/L]**

This reference interval applies to serum samples from healthy adults<sup>15,16</sup>.

The reference intervals are affected by many factors that may differ for each population studied. Each laboratory should establish its own expected values for *CardioPhase*<sup>®</sup> hsCRP as performed on the Dimension Vista<sup>®</sup> System.

**Maximum Observed Repeatability**

The expected maximum observed standard deviations (SD) for repeatability (within-run precision) using n = 5 replicates at the following nominal CRP concentrations are:

| CRP Concentration   | Acceptable SD Maximum  |
|---------------------|------------------------|
| 0.10 mg/dL [1 mg/L] | 0.03 mg/dL [0.26 mg/L] |
| 0.30 mg/dL [3 mg/L] | 0.06 mg/dL [0.64 mg/L] |

A system malfunction may exist if the acceptable SD maximum is exceeded.

**Specific Performance Characteristics**

The following data represent typical performance for the Dimension Vista<sup>®</sup> System.

**Precision<sup>17,a</sup>**

| Material    | Mean  |        | Standard Deviation mg/dL [mg/L] (% CV) |        |            |       |        |       |
|-------------|-------|--------|----------------------------------------|--------|------------|-------|--------|-------|
|             | mg/dL | [mg/L] | Repeatability                          |        | Within-Lab |       |        |       |
| hsCRP CON L | 0.115 | [1.15] | 0.006                                  | [0.06] | (4.8)      | 0.006 | [0.06] | (5.4) |
| hsCRP CON H | 0.346 | [3.46] | 0.014                                  | [0.14] | (4.0)      | 0.015 | [0.15] | (4.4) |
| Serum pool  | 0.239 | [2.39] | 0.013                                  | [0.13] | (5.2)      | 0.013 | [0.13] | (5.2) |
| Serum pool  | 0.650 | [6.50] | 0.033                                  | [0.33] | (5.0)      | 0.037 | [0.37] | (5.7) |
| Serum pool  | 0.772 | [7.72] | 0.036                                  | [0.36] | (4.6)      | 0.042 | [0.42] | (5.4) |

e) CLSI/NCCLS EP5-A2 was used. During each day of testing, two separate runs, with two test samples, for each test material, were analyzed for 20 days.

**Method Comparison<sup>18</sup>**

| Comparative Method                                                           | Regression Statistics <sup>d</sup> |                        | Correlation Coefficient | n                |
|------------------------------------------------------------------------------|------------------------------------|------------------------|-------------------------|------------------|
|                                                                              | Slope                              | Intercept mg/dL [mg/L] |                         |                  |
| <i>CardioPhase</i> <sup>®</sup> /hsCRP on the BN ProSpec <sup>®</sup> System | 1.044                              | 0.0003 [0.003]         | 0.995                   | 133 <sup>f</sup> |

f) CLSI/NCCLS EP9-A2 was used. The method used to fit the linear regression line was Passing Bablok.  
g) The range of CRP values in the correlation study was 0.0169 mg/dL to 0.8922 mg/dL [0.169 mg/L to 8.922 mg/L].

**Specificity**

**HIL Interference**

The *CardioPhase*<sup>®</sup> hsCRP method was evaluated for interference according to CLSI/NCCLS EP7-A2<sup>19</sup>. Bias is the difference in the results between the control sample (without the interferent) and the test sample (contains the interferent) expressed in percent. Bias exceeding 10 % is considered interference.

| Substance Tested         | Substance Concentration                             | CRP mg/dL [mg/L] | Bias* % |
|--------------------------|-----------------------------------------------------|------------------|---------|
| Hemoglobin (hemolysate)  | 1000 mg/dL [0.155 mmol/L]                           | 0.093 [0.93]     | +1      |
| Bilirubin (unconjugated) | 60 mg/dL [1026 µmol/L]                              | 0.097 [0.97]     | -3      |
| Bilirubin (conjugated)   | 60 mg/dL [1026 µmol/L]                              | 0.097 [0.97]     | +1      |
| Lipemia                  | Refer to "Specimen Collection and Handling" section |                  |         |

\* Analyte results should not be corrected based on this bias.

**Non Interfering Substances**

The following substances do not interfere with the *CardioPhase*<sup>®</sup> hsCRP method when present in serum and plasma at the concentrations indicated. Inaccuracies (biases) due to these substances are less than 10 % at CRP concentration of 0.023 mg/dL to 0.591 mg/dL [0.23 mg/L to 5.91 mg/L].

| Substance              | Test Concentration | SI Units    |
|------------------------|--------------------|-------------|
| Acetaminophen          | 0.025 mg/dL        | 1.66 µmol/L |
| Amikacin               | 15 mg/dL           | 256 µmol/L  |
| Ammonium heparin       | 3 U/mL             | 3000 U/L    |
| Ampicillin             | 5.3 mg/dL          | 152 µmol/L  |
| Ascorbic acid          | 5 mg/dL            | 227 µmol/L  |
| Caffeine               | 6 mg/dL            | 308 µmol/L  |
| Carbamazepine          | 3 mg/dL            | 127 µmol/L  |
| Chloramphenicol        | 5 mg/dL            | 155 µmol/L  |
| Chlordiazepoxide       | 1 mg/dL            | 33.3 µmol/L |
| Chlorpromazine         | 0.2 mg/dL          | 6.27 µmol/L |
| Cholesterol            | 500 mg/dL          | 12.9 mmol/L |
| Cimetidine             | 2 mg/dL            | 79.2 µmol/L |
| Creatinine             | 30 mg/dL           | 2652 µmol/L |
| Dextran 40             | 6000 mg/dL         | 1500 µmol/L |
| Diazepam               | 0.5 mg/dL          | 17.6 µmol/L |
| Digoxin                | 5 ng/mL            | 6.15 nmol/L |
| Erythromycin           | 6 mg/dL            | 81.6 µmol/L |
| Ethanol                | 400 mg/dL          | 86.8 mmol/L |
| Ethosuximide           | 25 mg/dL           | 1770 µmol/L |
| Furosemide             | 6 mg/dL            | 181 µmol/L  |
| Gentamicin             | 12 mg/dL           | 251 µmol/L  |
| Ibuprofen              | 50 mg/dL           | 2425 µmol/L |
| Immunoglobulin G (IgG) | 5 g/dL             | 50 g/L      |
| Lidocaine              | 1.2 mg/dL          | 51.2 µmol/L |
| Lithium chloride       | 2.3 mg/dL          | 3.2 mmol/L  |
| Lithium heparin        | 3 U/mL             | 3000 U/L    |
| Nicotine               | 0.1 mg/dL          | 6.2 µmol/L  |
| Penicillin G           | 25 U/mL            | 25000 U/L   |
| Pentobarbital          | 8 mg/dL            | 354 µmol/L  |
| Phenobarbital          | 10 mg/dL           | 431 µmol/L  |
| Phenytoin              | 5 mg/dL            | 198 µmol/L  |
| Primidone              | 4 mg/dL            | 183 µmol/L  |
| Propoxyphene           | 0.2 mg/dL          | 4.91 µmol/L |
| Protein, Albumin       | 6 g/dL             | 60 g/L      |
| Rheumatoid Factors     | 500 IU/mL          | 500 IU/mL   |
| Salicylic acid         | 60 mg/dL           | 4.34 mmol/L |
| Sodium heparin         | 3 U/mL             | 3000 U/L    |
| Theophylline           | 4 mg/dL            | 222 µmol/L  |
| Urea                   | 500 mg/dL          | 83.3 mmol/L |
| Uric acid              | 20 mg/dL           | 1190 µmol/L |
| Valproic acid          | 50 mg/dL           | 3467 µmol/L |

The *CardioPhase*<sup>®</sup> hsCRP method shows no hook effect up to 130.22 mg/dL [1302.2 mg/L].

**Recovery**

Recovery of protein reference material ERM<sup>®</sup>-DA470 (CRM 470) ranged from 96.6 - 104.1 % with a mean recovery of 99.2 %.

**Limit of Quantitation: 0.016 mg/dL [0.16 mg/L]**

The limit of quantitation represents the lower limit of the reportable range for CRP.

**Bibliography:** See adjacent panel.

**Symbols Key:** See adjacent panel.

Dimension Vista<sup>®</sup>, Dimension<sup>®</sup>, Flex<sup>®</sup> and BN ProSpec<sup>®</sup> are trademarks of Siemens Healthcare Diagnostics.

*CardioPhase*<sup>®</sup> is a registered trademark in the USA, in Germany and other countries.

ERM<sup>®</sup> is the registered trademark for European Reference Materials.

\* Licensed under US Patent 6,040,147

# DADE BEHRING

## Dimension Vista<sup>®</sup> System

### Flex<sup>®</sup> reagent cartridge

### hsCRP

Ausgabedatum 2008-02

#### CardioPhase<sup>®</sup> high sensitivity CRP

**Verwendungszweck:** Die CardioPhase<sup>®</sup> hsCRP-Methode ist ein *in-vitro*-Diagnostikum zur quantitativen Bestimmung von C-reaktivem Protein (CRP) in Humanserum und Heparinplasma mit dem Dimension Vista<sup>®</sup> System.

Bestimmungen von hochsensitivem CRP (hsCRP) eignen sich zur Beurteilung von Zuständen, die in Verbindung mit Entzündungen bei ansonsten gesunden Personen auftreten. Außerdem können sie als unabhängige Risikomarker zur Erkennung und Einordnung von Personen verwendet werden, für die das Risiko einer kardiovaskulären Erkrankung besteht\*. In Verbindung mit traditionellen klinischen Laboruntersuchungen akuter Koronarsyndrome können Messungen von hsCRP als unabhängige Marker für die Prognose rezidivierender Ereignisse bei Patienten mit stabilen Koronarerkrankungen oder akuten Koronarsyndromen dienen.

**Zusammenfassung:** Bei CRP handelt es sich um eines der „Akute-Phase“-Proteine, deren Serum- bzw. Plasmakonzentrationen bei allgemeinen unspezifischen Reaktionen auf infektiöse und nicht infektiöse entzündliche Prozesse ansteigen. CRP wird in der Leber synthetisiert und liegt normalerweise im Serum oder Plasma nur in Spuren vor. Bei verschiedenen Krankheitszuständen, die zu Gewebeschäden, Infektionen oder akuten Entzündungen führen, können die CRP-Werte über den Normalwert auf 20 bis 500 mg/l ansteigen<sup>1</sup>. Da erhöhte CRP-Werte immer mit pathologischen Veränderungen verbunden sind, liefert die CRP-Methode wertvolle Informationen für die Diagnose, Therapie und Überwachung entzündlicher Prozesse und der damit zusammenhängenden Krankheiten<sup>2,3,4</sup>. Erhöhte CRP-Konzentrationen sind unspezifisch und dürfen nur im Rahmen einer vollständigen klinischen Anamnese interpretiert werden. Studien haben ergeben, dass die CRP-Messung durch hochsensitive Methoden einen hohen unabhängigen Voraussagewert für die Risikoprognose kardiovaskulärer und peripherer Gefäßerkrankungen hat<sup>5</sup>. Bestimmungen von hochsensitivem CRP haben nachweislich auch den prädiktiven Wert anderer, für die Risikoeinschätzung kardiovaskulärer und peripherer Gefäßerkrankungen eingesetzter Marker gesteigert<sup>6,7,8</sup>. Durch hochsensitive CRP-Methoden nachgewiesene erhöhte CRP-Werte können wertvolle Hinweise für die Prognose und Behandlung von Personen mit akutem Koronarsyndrom liefern<sup>9</sup>.

**Grundlagen des Verfahrens:** Mit monoklonalen Antikörpern beschichtete Polystyrolpartikel, die spezifisch auf humanes CRP reagieren, werden beim Vermischen mit einer CRP-haltigen Probe aggregiert. Diese Aggregate streuen das eingestrahlte Licht. Die Intensität des Streulichts ist proportional zur Konzentration des jeweiligen Proteins in der Probe. Die Auswertung erfolgt durch Vergleich mit einem Standard bekannter Konzentration.

#### Reagenzien

| Zellen <sup>a,b</sup> | Form    | Bestandteil                                                                  | Konzentration <sup>c</sup> | Quelle |
|-----------------------|---------|------------------------------------------------------------------------------|----------------------------|--------|
| 1 - 8                 | Flüssig | hsCRP-Zusatzreagenz:<br>Phosphatpuffer;<br>Polidocanol                       | 1.9 g/l                    |        |
| 9 - 12                | Flüssig | Hochsensitives CRP-Reagenz:<br>Polystyrolpartikel;<br>Monoklonale Antikörper | 1 g/l<br>13 mg/l           | Maus   |

- a) Die Zellen sind vom breiten Ende der Kassette aus durchgehend nummeriert.  
b) Enthalten Konservierungsmittel.  
c) Nominalwert pro Zelle in einer Kassette.

#### Vorsichtsmaßnahmen:

Enthält Natriumazid (< 0.1 %) als Konservierungsmittel. Natriumazid kann mit kupfer- oder bleihaltigen Abflussrohren explosive Verbindungen eingehen. Entsorgen Sie bitte ordnungsgemäß entsprechend den örtlichen Richtlinien. Enthält Material menschlichen Ursprungs.

Jede individuelle Blutspende wurde mit negativem Befund auf humane Immundefizienz-Viren (HIV) 1 und 2, Hepatitis B-Viren (HBV) und Hepatitis C-Viren (HCV) getestet. Die eingesetzten Teste entsprachen entweder den Anforderungen der EU Richtlinie über *In-vitro*-Diagnostika oder waren von der FDA zugelassen. Da kein Test mit völliger Sicherheit die Abwesenheit von Infektionserregern garantieren kann, sollten alle Produkte mit humanen Bestandteilen mit angemessener Sorgfalt behandelt werden.

Gebrauchte Küvetten enthalten menschliche Körperflüssigkeiten; die Küvetten mit der entsprechenden Vorsicht handhaben; Hautkontakt oder Verschlucken vermeiden.

Nur zur *in-vitro*-diagnostischen Anwendung.

#### Reagenz Vorbereitung:

Alle Reagenzien sind flüssig und gebrauchsfertig.

**Lagerung:** 2 - 8 °C.

**Verfallsdatum:** Verfallsdatum einzelner ungeöffneter Reagenzkassetten siehe Umverpackung. Versiegelte Zellen sind im Gerät 90 Tage lang stabil.

**Stabilität geöffneter Zellen:** 21 Tage für Zellen 1 - 12

#### Probengewinnung und Probenvorbereitung:

Empfohlene Probenarten: Serum oder Heparinplasma.

Serum und Plasma können mit den empfohlenen Verfahren zur Gewinnung von diagnostischen Blutproben durch Venenpunktion gewonnen werden<sup>10</sup>.

Anweisungen zur Verwendung der Probenentnahmeverrichtung und zur Probenverarbeitung beachten<sup>10</sup>. Für Serum sollte vor dem Zentrifugieren eine vollständige Gerinnung abgewartet werden. Das Serum oder Plasma sollte so schnell wie möglich physikalisch von den Zellen getrennt werden, spätestens aber zwei Stunden nach der Probengewinnung<sup>11</sup>.

Es sollten möglichst frische (maximal sieben Tage bei 2 - 8 °C aufbewahrte) oder gefroren gelagerte Proben eingesetzt werden. Proben können unter -20 °C bis zu acht Monate<sup>20</sup> lang aufbewahrt werden, wenn sie maximal 24 Stunden nach Probenentnahme eingefroren werden und wiederholtes Auftauen und Einfrieren vermieden wird. Lipämische oder tiefgefrorene Proben, die nach dem Auftauen eine Trübung aufweisen, müssen vor dem Test durch Zentrifugation geklärt werden (10 Minuten bei etwa 15 000 x g). Die Proben sollten frei von Partikeln sein.

#### Testverfahren

##### Inhalt der Handelspackung

CardioPhase<sup>®</sup> hsCRP Flex<sup>®</sup> reagent cartridge, Kat.-Nr. K7046

##### Zusätzlich benötigte Materialien

PROT2 CAL, Kat.-Nr. KC780

Systemverdünnungslösung, Kat.-Nr. KS804

Qualitätskontrollmaterialien, z. B.:

hsCRP CON L, Kat.-Nr. KC755

hsCRP CON H, Kat.-Nr. KC757

##### Testschritte

Probennahme, Reagenzzugabe, Mischen und Bearbeitung werden vom Dimension Vista<sup>®</sup> System automatisch durchgeführt. Genaue Informationen zu diesen Vorgängen entnehmen Sie bitte dem Dimension Vista<sup>®</sup> Bedienungs- handbuch.

Initiale Probenverdünnung

Probenvolumen  
(pipettiert in Küvette)  
Diluens Volumen  
Hochsensitives CRP-Reagenz  
Temperatur  
Reaktionszeit  
Wellenlänge  
Messverfahren

#### Testbedingungen

1:1 (unverdünnt)

#### Küvette

1.37 µl

118 µl  
27.3 µl  
37.0 °C  
5 Minuten 50 Sekunden  
840 nm  
Nephelometrisch

#### Kalibration

PROT2 CAL, Kat.-Nr. KC780

7 Level, n = 3

mg/dl [mg/l]<sup>d</sup>

(mg/dl x 0.1) = [mg/l]

0.012, 0.025, 0.056, 0.111, 0.222, 0.50, 1.00 mg/dl

[0.12, 0.25, 0.56, 1.11, 2.22, 5.0, 10.0 mg/l]

Um Kalibrator-Level zu erhalten, die den Messbereich abdecken, wird PROT2 CAL automatisch vom Gerät mit Systemverdünnungslösung auf die folgenden Verdünnungen verdünnt:

Level 1: Verdünnung 1:162

Level 2: Verdünnung 1:81

Level 3: Verdünnung 1:36

Level 4: Verdünnung 1:18

Level 5: Verdünnung 1:9

Level 6: Verdünnung 1:4

Level 7: Verdünnung 1:2

Alle 45 Tage für jede Charge

Basierend auf der Überprüfung einer akzeptierten Kalibration kann das Kalibrationsintervall ausgedehnt werden.

Level 1: Verdünnung 1:162

Level 2: Verdünnung 1:81

Level 3: Verdünnung 1:36

Level 4: Verdünnung 1:18

Level 5: Verdünnung 1:9

Level 6: Verdünnung 1:4

Level 7: Verdünnung 1:2

Alle 45 Tage für jede Charge

Basierend auf der Überprüfung einer akzeptierten Kalibration kann das Kalibrationsintervall ausgedehnt werden.

Kalibrationsmaterial

Kalibrationschema

Einheiten

Typische Kalibrations-Level

Kalibrationshäufigkeit

Eine neue Kalibration ist erforderlich:

- Für jede neue Charge von Flex<sup>®</sup> reagent cartridges
- Nach größeren Wartungs- oder Servicemaßnahmen, nach Maßgabe der Kontrollergebnisse
- Nach Maßgabe der Qualitätskontrollverfahren des Labors
- Nach Maßgabe behördlicher Vorschriften

d) Systeme International d'Unités [SI-Einheiten] stehen in Klammern.

#### Qualitätskontrolle

Analysieren Sie mindestens einmal im täglichen Gebrauch mindestens zwei Level eines Qualitätskontrollmaterials (QC-Materials) mit bekannter C-reaktives Protein-Konzentration, z. B. hsCRP CON L oder H.

Wenn die ermittelten Ergebnisse außerhalb des akzeptablen Bereichs liegen, befolgen Sie die laborinternen QC-Bestimmungen.

**Ergebnisse:** Das Gerät berechnet die Konzentration von C-reaktives Protein in mg/dl [mg/l] nach dem Berechnungsschema, das im Dimension Vista<sup>®</sup> Bedienungshandbuch dargestellt ist.

**Resultate dieses Tests sollten stets in Verbindung mit der Vorgeschichte des Patienten, dem klinischen Bild und anderen Untersuchungsergebnissen interpretiert werden.**

**Analytischer Messbereich (AMR): 0.016 - 0.95 mg/dl [0.16 - 9.50 mg/l]**

Dies ist der Messbereich für unverdünnte Proben, die vom Gerät automatisch verarbeitet werden. Wenn die Messergebnisse außerhalb des ersten Messbereichs liegen, kann die Bestimmung mit einer höher verdünnten Probe wiederholt werden.

Weitere Informationen zu Wiederholungsmessungen mit anderen Verdünnungen entnehmen Sie bitte dem Dimension Vista<sup>®</sup> Bedienungshandbuch.

- Proben mit Ergebnissen von über 0.95 mg/dl [9.50 mg/l] können mit einer höheren Verdünnung erneut analysiert werden.
- Ergebnisse kleiner 0.016 mg/dl [0.16 mg/l] werden vom Gerät als „kleiner 0.016 mg/dl“ ausgegeben.

#### Grenzen des Verfahrens

Trübungen und Partikel in den Proben können die Bestimmung stören. Deshalb sollten Proben, die Partikel enthalten, vor der Bestimmung zentrifugiert werden. Lipämische oder trübe Proben, die durch Zentrifugation (10 Minuten bei etwa 15 000 x g) nicht geklärt werden können, dürfen nicht verwendet werden.

Aufgrund von Matrixeffekten können für Kontroll- und Ringversuchsproben unterschiedliche Ergebnisse in Abhängigkeit von der verwendeten Bestimmungsmethode resultieren. Es kann daher notwendig sein, die Bewertung dieser Ergebnisse an methodenspezifischen Zielwerten vorzunehmen.

Das integrierte Meldesystem des Geräts verfügt über Markierungen und Kommentare, die Informationen zu Verarbeitungsfehlern des Geräts, Gerätestatusinformationen und Informationen zu möglichen Fehlern bei CardioPhase<sup>®</sup> hsCRP-Ergebnissen enthalten. Näheres zur Bedeutung der Markierungen und Kommentare entnehmen Sie bitte dem Dimension Vista<sup>®</sup> Bedienungshandbuch. Berichte, die Markierungen und/oder Kommentare enthalten, sollten gemäß den Verfahrensangeweisungen Ihres Labors behandelt und nicht weitergegeben werden.

Patientenproben können heterophile Antikörper enthalten, die in Immunassays zu falsch erhöhten oder falsch erniedrigten Ergebnissen führen können. Diese Methode wurde so entwickelt, dass die Einflüsse durch heterophile Antikörper auf ein Minimum reduziert werden<sup>12</sup>. Dennoch kann eine vollständige Unterdrückung dieser Einflüsse nicht bei allen Patientenproben garantiert werden. Ein Resultat, das im Widerspruch zum klinischen Bild oder den Vorwerten eines Patienten steht, sollte daher mit entsprechendem Vorbehalt interpretiert werden.

#### Empfehlungen des AHA/CDC-Expertengremiums<sup>4</sup>:

Die Empfehlungen des AHA/CDC-Expertengremiums in Bezug auf Einschränkungen bei der Nutzung von hsCRP lauten wie folgt:

- hsCRP-Konzentrationen dürfen die Untersuchung traditioneller kardiovaskulärer Risikofaktoren nicht ersetzen.
- Behandlungsrichtlinien für akute Koronarsyndrome dürfen nicht von hsCRP-Konzentrationen abhängig gemacht werden.
- Bei Verwendung des Assays für Zwecke der Risikoabschätzung muss bei Patienten mit einer auch nach wiederholten Tests anhaltenden, unerklärlichen deutlichen Erhöhung des hsCRP (> 10 mg/l) eine nicht kardiovaskuläre Ätiologie ausgeschlossen werden.
- Das Expertengremium spricht sich gegen ein hsCRP-Screening der erwachsenen Gesamtpopulation als generelle Vorsorgemaßnahme aus.

- Patienten mit Anzeichen einer aktiven Infektion, systemischer entzündlicher Prozesse oder von Trauma sollten erst dann einem Test auf kardiovaskuläre Risikofaktoren unterzogen werden, wenn diese Anzeichen abgeklungen sind.
- Sekundäre Maßnahmen der Prävention dürfen nicht von der hsCRP-Bestimmung abhängig gemacht werden, sondern sollten von diversen Risikofaktoren bestimmt werden (umfassende Risikoabschätzung).
- Zur Überprüfung einer Therapiewirkung dürfen keine seriellen Messungen von hsCRP herangezogen werden.
- Vor einer Risikoabschätzung sollten aufgrund der patientenspezifischen hsCRP-Schwankungen zwei getrennte hsCRP-Messungen (idealerweise im Abstand von zwei Wochen) erfolgen.

#### Ergebnisinterpretation

Bei der Auswertung der Ergebnisse sind auch kurz zurückliegende medizinische Ereignisse, die Gewebeerkrankungen, Infektionen oder Entzündungen hervorgerufen haben und erhöhte CRP-Konzentrationen zur Folge haben können, zu berücksichtigen.

#### Kardiovaskuläre und periphere Gefäßerkrankungen

##### Risikobewertung:

Der Nutzen von hsCRP-Messungen für die Prognose kardiovaskulärer Erkrankungen wurde in mehreren Studien überprüft. Proben einer Unterpopulation von 280 Patienten, die an der Physician's Health Study teilnahmen, wurden bei der Eingangsuntersuchung auf eine Anzahl von Biomarkern, einschließlich hsCRP, getestet. Dieses Kollektiv wurde neun Jahre lang beobachtet, um die Entwicklung peripherer Gefäßerkrankungen (Peripheral Arterial Disease, PAD) zu untersuchen. Die Grafik unten zeigt das relative Risiko (Konfidenzintervall 95 %), eine PAD zu entwickeln, als Funktion des hsCRP-Quartils<sup>13</sup>.

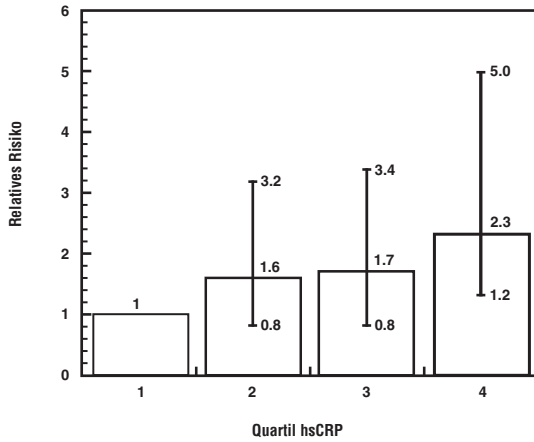

Im AHA/CDC Scientific Statement<sup>5</sup> sind folgende Richtlinien für die Risikobewertung angegeben:

| Risiko           | hsCRP (mg/l) |
|------------------|--------------|
| Niedrig          | < 1.0        |
| Durchschnittlich | 1.0 - 3.0    |
| Hoch             | > 3.0        |

#### Risikostratifikation:

Bei Patienten mit akutem Koronarsyndrom kann die hsCRP-Messung prognostische Informationen liefern. Ein CRP-Wert von >10 mg/l im frühen Stadium (6 - 24 Stunden nach Einsetzen der Symptome) war ein Anzeichen für ein erhöhtes Risiko kurzfristig (30 Tage - 1 Jahr) rezidivierender Herzerkrankungen<sup>5</sup>.

Eine Substudie an 447 Patienten in der CAPTURE-Studie untersuchte die klinischen Folgen erhöhter CRP-Konzentrationen für die Risikostratifikation von Patienten mit instabiler Angina. Wie in der folgenden Grafik dargestellt, war die Ereignisrate (Tod oder MI) bei Patienten mit einem CRP >10 mg/l höher als bei Patienten mit einem CRP <10 mg/l<sup>14</sup>.

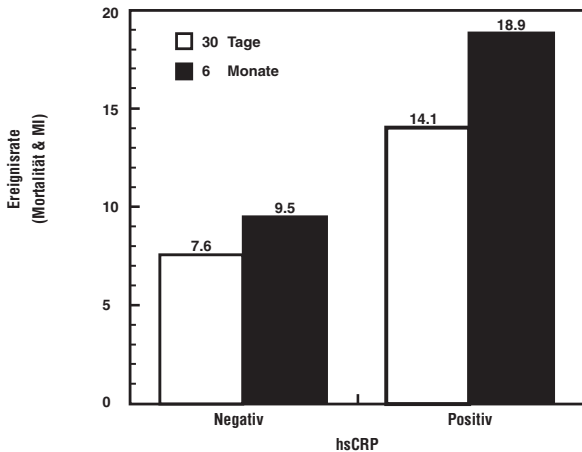

#### Erwartete Werte: unter 0.30 mg/dl [3.00 mg/l]

Dieser Referenzbereich gilt für Serumproben gesunder Erwachsener<sup>15,16</sup>.

Die Referenzbereiche werden von vielen Faktoren beeinflusst, die sich je nach untersuchter Population unterscheiden. Jedes Labor sollte seine eigenen erwarteten Werte für *CardioPhase*<sup>®</sup> hsCRP mit dem Dimension Vista<sup>®</sup> System ermitteln.

#### Maximal beobachtete Wiederholbarkeit

Die maximal zu erwartenden Standardabweichungen (SA) für die Wiederholbarkeit (Präzision in der Serie) mit n = 5 Wiederholungsmessungen bei den folgenden nominalen CRP-Konzentrationen betragen:

| CRP-Konzentration   | Maximal akzeptable SA  |
|---------------------|------------------------|
| 0.10 mg/dl [1 mg/l] | 0.03 mg/dl [0.26 mg/l] |
| 0.30 mg/dl [3 mg/l] | 0.06 mg/dl [0.64 mg/l] |

Wenn die maximal akzeptable Standardabweichung überschritten wird, kann eine Systemfehlfunktion vorliegen.

#### Spezifische Leistungscharakteristika

Die folgenden Daten stellen eine Normalfunktion des Dimension Vista<sup>®</sup> Systems dar.

#### Präzision<sup>17,a</sup>

| Material    | Mittelwert |        | Standardabweichung mg/dl (mg/l) (% VK) |        |             |       |        |       |
|-------------|------------|--------|----------------------------------------|--------|-------------|-------|--------|-------|
|             | mg/dl      | [mg/l] | Wiederholbarkeit                       |        | Intra-Labor |       |        |       |
| hsCRP CON L | 0.115      | [1.15] | 0.006                                  | [0.06] | (4.8)       | 0.006 | [0.06] | (5.4) |
| hsCRP CON H | 0.346      | [3.46] | 0.014                                  | [0.14] | (4.0)       | 0.015 | [0.15] | (4.4) |
| Serumpool   | 0.239      | [2.39] | 0.013                                  | [0.13] | (5.2)       | 0.013 | [0.13] | (5.2) |
| Serumpool   | 0.650      | [6.50] | 0.033                                  | [0.33] | (5.0)       | 0.037 | [0.37] | (5.7) |
| Serumpool   | 0.772      | [7.72] | 0.036                                  | [0.36] | (4.6)       | 0.042 | [0.42] | (5.4) |

e) CLSI/NCCLS EP5-A2 wurde angewandt. Es wurden 20 Tage lang jeden Tag zwei separate Durchläufe mit zwei Proben für jedes Probenmaterial analysiert.

#### Methodenvergleich<sup>18</sup>

| Vergleichsmethode                                                        | Regressionsstatistik <sup>1</sup> |                              |                         | n                |
|--------------------------------------------------------------------------|-----------------------------------|------------------------------|-------------------------|------------------|
|                                                                          | Steigung                          | Achsenabschnitt mg/dl (mg/l) | Korrelationskoeffizient |                  |
| <i>CardioPhase</i> <sup>®</sup> /hsCRP am BN ProSpec <sup>®</sup> System | 1.044                             | 0.0003 [0.003]               | 0.995                   | 133 <sup>a</sup> |

f) CLSI/NCCLS EP9-A2 wurde angewandt. Die lineare Regressionsgerade wurde mit der Passing-Bablok-Methode angepasst.

g) Der Bereich der CRP-Werte in der Korrelationsstudie lag zwischen 0.0169 mg/dl und 0.8922 mg/dl [0.169 mg/l und 8.922 mg/l].

#### Spezifität

##### HIL-Interferenz

Die *CardioPhase*<sup>®</sup> hsCRP-Methode wurde nach CLSI/NCCLS EP7-A2 auf mögliche Interferenz evaluiert<sup>19</sup>. Die Abweichung berechnet sich aus dem Werteunterschied zwischen der Kontrollprobe (ohne Störsubstanz) und der Testprobe (mit Störsubstanz) in Prozent. Eine Abweichung von über 10 % wird als Interferenz bewertet.

| Getestete Substanz       | Substanzkonzentration                                    | CRP mg/dl [mg/l] | Systematischer Fehler* % |
|--------------------------|----------------------------------------------------------|------------------|--------------------------|
| Hämoglobin (Hämolyt)     | 1000 mg/dl [0.155 mmol/l]                                | 0.093 [0.93]     | +1                       |
| Bilirubin (unkonjugiert) | 60 mg/dl [1026 µmol/l]                                   | 0.097 [0.97]     | -3                       |
| Bilirubin (konjugiert)   | 60 mg/dl [1026 µmol/l]                                   | 0.097 [0.97]     | +1                       |
| Lipämie                  | Siehe Abschnitt „Probengewinnung und Probenvorbereitung“ |                  |                          |

\* Ermittelte Analytkonzentrationen sollten nicht anhand dieses systematischen Fehlers korrigiert werden.

#### Nicht störende Substanzen

Die folgenden Substanzen haben keinen Einfluss auf die *CardioPhase*<sup>®</sup> hsCRP-Testergebnisse, wenn sie in Serum und Plasma in den genannten Konzentrationen enthalten sind. Ungenauigkeiten (Abweichungen) aufgrund dieser Substanzen belaufen sich auf unter 10 % bei einer CRP-Konzentration von 0.023 mg/dl bis 0.591 mg/dl [0.23 mg/l bis 5.91 mg/l].

| Substanz              | Testkonzentration | SI-Einheiten |
|-----------------------|-------------------|--------------|
| Acetaminophen         | 0.025 mg/dl       | 1.66 µmol/l  |
| Amikacin              | 15 mg/dl          | 256 µmol/l   |
| Ammoniumheparin       | 3 U/ml            | 3000 U/l     |
| Ampicillin            | 5.3 mg/dl         | 152 µmol/l   |
| Ascorbinsäure         | 5 mg/dl           | 227 µmol/l   |
| Koffein               | 6 mg/dl           | 308 µmol/l   |
| Carbamazepin          | 3 mg/dl           | 127 µmol/l   |
| Chloramphenicol       | 5 mg/dl           | 155 µmol/l   |
| Chlordiazepoxid       | 1 mg/dl           | 33.3 µmol/l  |
| Chlorpromazin         | 0.2 mg/dl         | 6.27 µmol/l  |
| Cholesterin           | 500 mg/dl         | 12.9 mmol/l  |
| Cimetidin             | 2 mg/dl           | 79.2 µmol/l  |
| Kreatinin             | 30 mg/dl          | 2652 µmol/l  |
| Dextran 40            | 6000 mg/dl        | 1500 µmol/l  |
| Diazepam              | 0.5 mg/dl         | 17.6 µmol/l  |
| Digoxin               | 5 ng/ml           | 6.15 nmol/l  |
| Erythromycin          | 6 mg/dl           | 81.6 µmol/l  |
| Ethanol               | 400 mg/dl         | 86.8 mmol/l  |
| Ethosuximid           | 25 mg/dl          | 1770 µmol/l  |
| Furosemid             | 6 mg/dl           | 181 µmol/l   |
| Gentamicin            | 12 mg/dl          | 251 µmol/l   |
| Ibuprofen             | 50 mg/dl          | 2425 µmol/l  |
| Immunglobulin G (IgG) | 5 g/dl            | 50 g/l       |
| Lidocain              | 1.2 mg/dl         | 51.2 µmol/l  |
| Lithiumchlorid        | 2.3 mg/dl         | 3.2 mmol/l   |
| Lithiumheparin        | 3 U/ml            | 3000 U/l     |
| Nikotin               | 0.1 mg/dl         | 6.2 µmol/l   |
| Penicillin G          | 25 U/ml           | 25000 U/l    |
| Pentobarbital         | 8 mg/dl           | 354 µmol/l   |
| Phenobarbital         | 10 mg/dl          | 431 µmol/l   |
| Phenytoin             | 5 mg/dl           | 198 µmol/l   |
| Primidon              | 4 mg/dl           | 183 µmol/l   |
| Propoxyphen           | 0.2 mg/dl         | 4.91 µmol/l  |
| Protein, Albumin      | 6 g/dl            | 60 g/l       |
| Rheumafaktoren        | 500 IU/ml         | 500 IU/ml    |
| Salicylsäure          | 60 mg/dl          | 4.34 mmol/l  |
| Natriumheparin        | 3 U/ml            | 3000 U/l     |
| Theophyllin           | 4 mg/dl           | 222 µmol/l   |
| Harnstoff             | 500 mg/dl         | 83.3 mmol/l  |
| Harnsäure             | 20 mg/dl          | 1190 µmol/l  |
| Valproinsäure         | 50 mg/dl          | 3467 µmol/l  |

Die *CardioPhase*<sup>®</sup> hsCRP-Methode zeigt bei Werten bis zu 130.22 mg/dl [1302.2 mg/l] keinen Hook-Effekt.

#### Wiederfindung

Die Wiederfindung des Referenzmaterials ERM<sup>®</sup>-DA470 (CRM 470) liegt bei 96.6 bis 104.1 % mit einer mittleren Wiederfindung von 99.2 %.

#### Quantifizierungsgrenze: 0.016 mg/dl [0.16 mg/l]

Die Quantifizierungsgrenze ist die untere Grenze des Nachweisbereichs für CRP.

Literatur: Siehe Verzeichnis im Anhang.

#### Symbolschlüssel: Siehe Verzeichnis im Anhang.

Dimension Vista<sup>®</sup>, Dimension<sup>®</sup>, Flex<sup>®</sup> und BN ProSpec<sup>®</sup> sind Warenzeichen von Siemens Healthcare Diagnostics.

*CardioPhase*<sup>®</sup> ist eine eingetragene Marke in den USA und anderen Ländern.

ERM<sup>®</sup> ist die eingetragene Marke für Europäische Referenzmaterialien.

\* Lizenziert unter US Patent 6,040,147



# DADE BEHRING

## Dimension Vista® System

### Flex® reagent cartridge

### hsCRP

Date d'édition 2008-02

#### CardioPhase® high sensitivity CRP

**Utilisation :** La méthode CardioPhase® CRP haute sensibilité (hsCRP) est un test diagnostique *in vitro* utilisé pour la mesure quantitative de la protéine C-réactive (CRP) dans le plasma humain ou hépariné sur le système Dimension Vista®.

Les dosages de CRP haute sensibilité peuvent être utilisés pour évaluer des états que l'on pense être associés à une inflammation, chez des individus à part cela en bonne santé et comme marqueurs de risque indépendants pour l'identification et la stratification de personnes présentant un risque de maladies cardiovasculaires futures\*. Lorsqu'il est associé à d'autres analyses usuelles du syndrome coronarien aigu pratiquées en laboratoire de chimie clinique, ce dosage peut être utile comme marqueur de pronostic indépendant d'événements récurrents, chez les patients présentant une coronaropathie stable ou un syndrome coronarien aigu.

**Résumé :** La CRP est l'une des protéines dites de phase aiguë, dont le taux dans le sérum ou le plasma augmente lors d'une réponse systémique non spécifique à des processus inflammatoires infectieux et non infectieux. La CRP est synthétisée dans le foie et est normalement présente à l'état de trace dans le sérum ou le plasma.

Dans le cas de divers états pathologiques engendrant une lésion tissulaire, une infection ou une inflammation aiguë, les valeurs de CRP peuvent être supérieures à la normale et atteindre entre 20 et 500 mg/l<sup>1</sup>. Comme les taux élevés de CRP sont toujours associés à des changements pathologiques, la méthode CRP fournit des informations utiles sur le diagnostic, le traitement et la surveillance des processus inflammatoires et des maladies associées<sup>2,3,4</sup>. L'augmentation des valeurs de CRP n'est pas spécifique et elle ne doit pas être interprétée sans les antécédents cliniques complets du patient. Des études ont montré que la mesure de la CRP par des méthodes haute sensibilité est un puissant facteur indépendant de prédiction du risque de maladies cardiovasculaires et vasculaires périphériques<sup>5</sup>. Les mesures de CRP haute sensibilité ont montré qu'elles renforçaient la valeur prédictive des autres marqueurs utilisés pour évaluer le risque de maladies cardiovasculaires et vasculaires périphériques<sup>6,7,8</sup>. Les valeurs de CRP élevées mesurées par des méthodes de CRP haute sensibilité pourront indiquer le pronostic des personnes souffrant de syndromes coronariens aigus et pourront être utiles à traiter ces patients<sup>5</sup>.

**Principes de la méthode :** Des particules de polystyrène revêtues d'anticorps monoclonaux spécifiques à la CRP humaine sont agrégées une fois mélangées avec des échantillons contenant de la CRP. Ces agrégats diffusent un faisceau lumineux à travers l'échantillon. L'intensité du faisceau lumineux est proportionnelle à la concentration de la protéine respective dans l'échantillon. Le résultat est évalué en comparaison d'une référence de concentration connue.

#### Réactifs

| Puits <sup>a,b</sup> | Forme   | Composant                                                                               | Concentration <sup>c</sup> | Origine |
|----------------------|---------|-----------------------------------------------------------------------------------------|----------------------------|---------|
| 1 - 8                | Liquide | Réactif supplémentaire hsCRP :<br>Tampon de phosphate ;<br>Polidocanol                  | 1.9 g/l                    |         |
| 9 - 12               | Liquide | Réactif CRP haute sensibilité :<br>Particules de polystyrène ;<br>Anticorps monoclonaux | 1 g/l<br>13 mg/l           | Souris  |

- a) Les puits sont numérotés de manière consécutive à partir de l'extrémité large de la cartouche.  
b) Contient des conservateurs.  
c) Valeur nominale par puits dans une cartouche.

#### Précautions :

Contient de l'azote de sodium (< 0.1 %) comme conservateur. L'azote de sodium peut réagir avec les tuyaux d'évacuation en cuivre ou en plomb et former des composés explosifs. L'évacuer conformément aux réglementations locales.

Contient des substances d'origine humaine.

Chaque donneur ou donneur d'unité a été testé avéré négative pour le virus d'immunodéficience humaine (HIV) 1 et 2, virus de l'hépatite B (HBV) et virus de l'hépatite C (HCV) en utilisant soit un test en conformité avec la directive diagnostique *in vitro* en vigueur en Europe ou les tests approuvés par le FDA. Comme aucun test connu ne peut offrir l'assurance complète de l'absence des agents infectieux, tous les produits dérivés humains devraient être manipulés avec les précautions appropriées.

Les cuvettes utilisées contiennent des liquides d'origine humaine ; manipuler avec soin pour éviter un contact avec la peau ou une ingestion.

Pour usage diagnostique *in vitro*.

#### Préparation des réactifs :

Tous les réactifs sont liquides et prêts à l'emploi.

**Conservation :** à 2 à 8 °C.

**Expiration :** Se reporter à la date d'expiration de chaque cartouche de réactif non ouverte. Les puits scellés sur l'instrument sont stables pendant 90 jours.

**Stabilité des puits ouverts :** 21 jours pour les puits 1 à 12

#### Prélèvement et manipulation des échantillons :

Types d'échantillons recommandés : sérum ou plasma hépariné.

Le sérum et le plasma peuvent être prélevés en suivant les procédures recommandées pour les prélèvements d'échantillons sanguins pour diagnostic par ponction veineuse<sup>9</sup>.

Suivre les instructions d'utilisation et de traitement fournies avec le dispositif de collecte des échantillons<sup>10</sup>.

Pour le sérum, une coagulation complète doit avoir lieu avant la centrifugation. Le sérum ou le plasma doit être physiquement séparé des cellules le plus tôt possible avec une limite maximum de deux heures suivant l'heure du prélèvement<sup>11</sup>.

Les échantillons doivent être aussi frais que possible (conservés moins de sept jours à une température de 2 à 8 °C) ou conservés à des températures de congélation. Les échantillons peuvent être conservés à une température inférieure à -20 °C pendant une période maximum de huit mois<sup>12</sup> s'ils sont congelés dans les 24 heures qui suivent leur prélèvement et si les cycles de congélation-décongélation sont évités. Les échantillons lipémiques ou congelés, qui deviennent troubles après décongélation, doivent être clarifiés par centrifugation (10 minutes à environ 15 000 x g) avant dosage. Les échantillons doivent être dépourvus de particules.

#### Procédure

##### Matériel fourni

CardioPhase® hsCRP Flex® reagent cartridge, N° de réf. K7046

##### Matériel requis mais non fourni

PROT2 CAL, No. de réf. KC780

Diluant du système, No. de réf. KS804

Matériels de contrôle qualité, tels que :

hsCRP CON L, No. de réf. KC755

hsCRP CON H, No. de réf. KC757

##### Étapes du dosage

L'échantillonnage, la distribution des réactifs, le mélange et le traitement sont automatiquement réalisés par le système Dimension Vista®. Pour les détails du traitement, voir le guide de l'utilisateur du système Dimension Vista®.

Dilution initiale de l'échantillon

Conditions du dosage

1 : 1 (pur)

Volume d'échantillon

Cuvette

1.37 µl

(distribué dans la cuvette)

Volume de diluant

118 µl

Réactif CRP haute sensibilité

27.3 µl

Température

37.0 °C

Temps de réaction

5 minutes 50 secondes

Longueur d'onde

840 nm

Type de mesure

Néphélométrique

#### Étalonnage

Matériel d'étalonnage

PROT2 CAL, N° de réf. KC780

Schéma d'étalonnage

7 niveaux, n = 3

Unités

mg/dl [mg/l]<sup>d</sup>

(mg/dl x 0.1) = [mg/L]

Niveaux d'étalonnage type

0.012, 0.025, 0.056, 0.111, 0.222, 0.50, 1.0 mg/dl

[0.12, 0.25, 0.56, 1.11, 2.22, 5.0, 10.0 mg/l]

Pour obtenir des niveaux de calibrateurs couvrant le domaine de mesure, le calibrateur PROT2 CAL est dilué automatiquement par l'instrument avec le diluant système, aux dilutions suivantes :

Niveau 1 : dilution 1:162

Niveau 2 : dilution 1:81

Niveau 3 : dilution 1:36

Niveau 4 : dilution 1:18

Niveau 5 : dilution 1:9

Niveau 6 : dilution 1:4

Niveau 7 : dilution 1:2

Tous les 45 jours pour chacun des lots

L'intervalle de Calibration peut-être allongé si la vérification de la calibration est acceptable.

Fréquence de Calibration

Un nouvel étalonnage est obligatoire :

- Pour chaque nouveau lot de cartouches de réactifs Flex®
- Après une maintenance ou une réparation majeure, selon les résultats du contrôle qualité
- Comme indiqué dans les procédures de contrôle qualité du laboratoire
- Selon les exigences des réglementations gouvernementales

d) Les unités SI (Système International d'Unités) sont indiquées entre crochets.

#### Contrôle qualité

Analyser au moins une fois par jour d'utilisation, au moins deux niveaux de matériel de contrôle de qualité (CQ) aux concentrations de protéine C-réactive connues, par exemple, hsCRP CON L ou H.

Suivre les procédures CQ internes du laboratoire si les résultats obtenus se situent en dehors des limites de contrôle.

**Résultats :** L'instrument calcule la concentration de protéine C-réactive en mg/dl [mg/l] selon les formules de calcul décrites dans le guide de l'utilisateur du système Dimension Vista®.

**Les résultats de ce test doivent toujours être interprétés en conjonction avec les antécédents médicaux du patient, son motif de présentation clinique et d'autres constatations.**

**Intervalle de mesure analytique (IMA) : 0.016 - 0.95 mg/dl [0.16 - 9.50 mg/l]**

Il s'agit de l'intervalle de mesure pour des échantillons non dilués automatiquement traités par le système. Si les résultats obtenus se situent en dehors de l'intervalle de mesure initial, la méthode peut être répétée en procédant à une dilution plus importante de l'échantillon.

Pour obtenir des informations sur la répétition de mesures en procédant à d'autres dilutions, se reporter au guide de l'utilisateur du système Dimension Vista®.

- Les échantillons présentant des résultats supérieurs à 0.95 mg/dl [9.50 mg/l] doivent être redosés après dilution plus importante.
- Les échantillons dont les résultats sont inférieurs à 0.016 mg/dl [0.16 mg/l] seront signalés par l'instrument comme étant « inférieurs à 0.016 mg/dl ».

#### Limites de la procédure

Les échantillons troubles ou contenant des particules pouvant interférer avec la détermination. Par conséquent, les échantillons contenant des particules doivent être centrifugés avant analyse. Les échantillons lipémiques ou troubles, qui ne peuvent pas être clarifiés par centrifugation (10 minutes à environ 15 000 x g), ne doivent pas être utilisés.

En raison d'effets matriciels, les échantillons d'études intra-laboratoires et les échantillons de contrôle peuvent produire des résultats différents selon la méthode de dosage utilisée. Il peut donc être nécessaire de procéder à l'exploitation des résultats selon les valeurs-cibles spécifiques à la méthode utilisée.

Le système de communication des résultats de l'instrument utilise des indicateurs et des commentaires pour informer l'utilisateur des erreurs de traitement de l'instrument, de l'état de l'instrument et des erreurs potentielles dans les résultats de CardioPhase® hsCRP. Pour la signification des indicateurs et des commentaires, se reporter au Manuel de l'opérateur du Dimension Vista®. Tout rapport contenant des indicateurs et/ou commentaires doit être traité conformément au mode opératoire du laboratoire et ne doit pas être communiqué.

Les échantillons patients pourront contenir des anticorps hétérophiles susceptibles de réagir dans des immunodosages et de fausser les résultats vers le haut ou vers le bas. Ce coffret a été conçu pour minimiser l'interférence des anticorps hétérophiles<sup>12</sup>. Néanmoins, l'élimination totale de cette interférence pour tous les échantillons de patients ne peut être garantie. Un résultat de dosage en contradiction avec les éléments cliniques et l'historique du patient devrait être interprété avec prudence.

#### Recommandations du panel d'experts de l'AHA/CDC<sup>9</sup> :

Le panel d'experts de l'AHA/CDC fait les recommandations suivantes en ce qui concerne les limites d'utilisation de la hsCRP :

- Les niveaux de hsCRP ne doivent pas remplacer les facteurs de risque cardiovasculaires traditionnels.
- L'application de directives de traitement aux syndromes coronariens aigus ne doit pas dépendre des niveaux de hsCRP.
- Lorsque le dosage est utilisé pour évaluer le risque, les patients présentant une augmentation prononcée persistante et inexplicable de la hsCRP (>10 mg/l) après des tests répétés doivent faire l'objet d'une évaluation pour étiologies non cardiovasculaires.
- Le panel d'experts déconseille le dosage de la hsCRP pour l'ensemble de la population adulte comme mesure de santé publique.

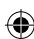

- Les patients présentant une infection évolutive, des processus inflammatoires systémiques ou un trauma avérés ne doivent pas être testés pour évaluation du risque de maladie cardiovasculaire tant que ces états n'auront pas régressé.
- L'application de mesures préventives secondaires ne doit pas dépendre de la mesure de hsCRP, mais plutôt de toute une série de facteurs de risque (évaluation globale du risque).
- Des mesures en série de la hsCRP ne doivent pas servir à surveiller les effets du traitement.
- Deux mesures séparées de la hsCRP (dans l'idéal, à 2 semaines d'intervalle) doivent être effectuées avant l'évaluation du risque, en raison de la variabilité de la hsCRP chez un même patient.

#### Interprétation des résultats

Des épisodes médicaux récents engendrant une lésion tissulaire, une infection ou une inflammation, qui peut causer une augmentation des niveaux de CRP, doivent également être pris en considération lors de l'interprétation des résultats.

#### Évaluation du risque de maladies cardiovasculaires et de maladies vasculaires

##### Périphériques :

Plusieurs études ont examiné l'utilité des mesures de la hsCRP pour la prédiction du risque de maladies cardiovasculaires. Dans un sous-ensemble de 280 personnes participant à la Physician's Health Study, des échantillons de début d'étude ont été analysés pour doser un certain nombre de marqueurs biologiques, notamment la hsCRP. La population a été suivie pendant 9 ans pour évaluer l'évolution de la maladie artérielle périphérique (PAD). Le graphique suivant montre le risque relatif (intervalle de confiance à 95 %) de développement d'une maladie artérielle périphérique comme fonction du quartile de hsCRP<sup>13</sup>.

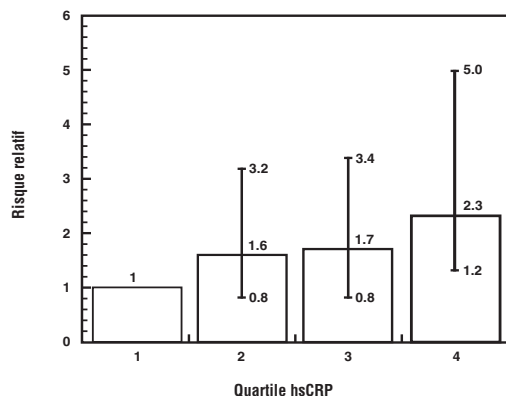

L'énoncé scientifique de l'AHA/CDC<sup>2</sup> propose les directives suivantes d'évaluation du risque :

| Risque | hsCRP (mg/l) |
|--------|--------------|
| Faible | < 1.0        |
| Moyen  | 1.0 - 3.0    |
| Élevé  | > 3.0        |

#### Stratification du risque :

Chez les patients présentant des syndromes coronaires aigus, la mesure de la hsCRP peut fournir des informations de pronostic. Une valeur de CRP > 10 mg/l au cours de la période initiale (6 à 24 heures après l'apparition des symptômes) s'est avérée indiquer un risque accru d'événements cardiaques récurrents à court terme (30 jours - 1 an)<sup>5</sup>.

Une sous-étude incluant 447 patients dans l'étude CAPTURE a examiné les implications cliniques de niveaux élevés de CRP pour la stratification du risque chez les patients présentant un angor instable. Comme l'indique le graphe suivant, les patients présentant une CRP > 10 mg/l ont affiché un taux supérieur d'épisodes (mortalité ou IM) par rapport aux patients avec une CRP < 10 mg/l<sup>14</sup>.

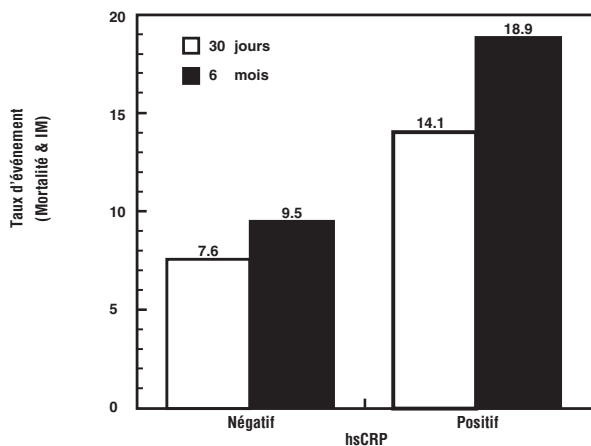

#### Valeurs attendues : moins de 0.30 mg/dl [3.00 mg/l]

Cet intervalle de référence s'applique aux échantillons de sérum prélevés sur des adultes en bonne santé<sup>15,16</sup>.

Les intervalles de référence sont affectés par de nombreux facteurs qui peuvent être différents pour chaque population étudiée. Aussi chaque laboratoire doit déterminer ses propres valeurs attendues pour la CardioPhase<sup>®</sup> hsCRP mesurée sur le système Dimension Vista<sup>®</sup>.

#### Reproductibilité

Les écarts-types (E-T) observés maximums attendus pour la reproductibilité (précision intra-série) sur la base de n = 5 répétitions aux concentrations de CRP nominales suivantes sont :

| Concentration CRP   | E-T maximum acceptable |
|---------------------|------------------------|
| 0.10 mg/dl [1 mg/l] | 0.03 mg/dl [0.26 mg/l] |
| 0.30 mg/dl [3 mg/l] | 0.06 mg/dl [0.64 mg/l] |

Si l'écart-type maximum acceptable est dépassé, le système connaît peut-être un dysfonctionnement.

#### Caractéristiques spécifiques de performance

Les données suivantes représentent une performance-type pour le système Dimension Vista<sup>®</sup>.

#### Précision<sup>17,8</sup>

| Matériel      | Moyenne |        | Écart-type mg/dl [mg/l] (CV en %) |                    |
|---------------|---------|--------|-----------------------------------|--------------------|
|               | mg/dl   | [mg/l] | Reproductibilité                  | Intra-laboratoire  |
| hsCRP CON L   | 0.115   | [1.15] | 0.006 [0.06] (4.8)                | 0.006 [0.06] (5.4) |
| hsCRP CON H   | 0.346   | [3.46] | 0.014 [0.14] (4.0)                | 0.015 [0.15] (4.4) |
| Pool de sérum | 0.239   | [2.39] | 0.013 [0.13] (5.2)                | 0.013 [0.13] (5.2) |
| Pool de sérum | 0.650   | [6.50] | 0.033 [0.33] (5.0)                | 0.037 [0.37] (5.7) |
| Pool de sérum | 0.772   | [7.72] | 0.036 [0.36] (4.6)                | 0.042 [0.42] (5.4) |

e) La directive CLSI/NCCLS EP5-A2 a été utilisée. Durant chaque jour de test, deux dosages séparés, avec deux échantillons de test pour chaque matériel de test, ont été effectués sur 20 jours.

#### Comparaison de la méthode<sup>18</sup>

| Méthode comparative                                                   | Statistique de régression <sup>1</sup> |                                   | Coefficient de corrélation | n                |
|-----------------------------------------------------------------------|----------------------------------------|-----------------------------------|----------------------------|------------------|
|                                                                       | Pente                                  | Ordonnée à l'origine mg/dl [mg/l] |                            |                  |
| CardioPhase <sup>®</sup> hsCRP sur le système BN ProSpec <sup>®</sup> | 1.044                                  | 0.0003 [0.003]                    | 0.995                      | 133 <sup>9</sup> |

f) La directive CLSI/NCCLS EP9-A2 a été utilisée. La méthode utilisée pour ajuster la droite de régression linéaire était celle de Passing Bablok.

g) L'intervalle des valeurs CRP dans l'étude de corrélation était de 0.0169 mg/dl à 0.8922 mg/dl [0.169 mg/l à 8.922 mg/l].

#### Spécificité

##### Interférence HIL

L'interférence de la méthode CardioPhase<sup>®</sup> hsCRP a été évaluée conformément à CLSI/NCCLS EP7-A2<sup>19</sup>. Un biais représente la différence dans les résultats entre l'échantillon de contrôle (sans la substance interférente) et l'échantillon de test (avec la substance interférente) exprimée en pourcentage. Un biais supérieur à 10 % est considéré comme une « interférence ».

| Substance testée        | Concentration de substance                                                | CRP mg/dl [mg/l] | Biais* %        |
|-------------------------|---------------------------------------------------------------------------|------------------|-----------------|
| Hémoglobine (hémolysat) | 1000 mg/dl                                                                | [0.155 mmol/l]   | 0.093 [0.93] +1 |
| Bilirubine (indirecte)  | 60 mg/dl                                                                  | [1026 µmol/l]    | 0.097 [0.97] -3 |
| Bilirubine (directe)    | 60 mg/dl                                                                  | [1026 µmol/l]    | 0.097 [0.97] +1 |
| Lipémie                 | Se reporter à la section « Prélèvement et manipulation des échantillons » |                  |                 |

\* Les résultats d'analyse ne doivent pas être corrigés en fonction de ce biais.

#### Substances non interférentes

Les substances suivantes n'interfèrent pas avec la méthode CardioPhase<sup>®</sup> hsCRP lorsqu'elles sont présentes dans le sérum et le plasma aux concentrations indiquées. Les imprécisions (biais) causées par ces substances sont inférieures à 10 % à une concentration CRP de 0.023 mg/dl à 0.591 mg/dl [0.23 mg/l à 5.91 mg/l].

| Substance                    | Concentration de l'échantillon | Unités SI    |
|------------------------------|--------------------------------|--------------|
| Paracétamol (acétaminophène) | 0.025 mg/dl                    | 1.66 µmol/l  |
| Amikacine                    | 15 mg/dl                       | 256 µmol/l   |
| Héparine ammonium            | 3 U/ml                         | 3000 U/l     |
| Ampicilline                  | 5.3 mg/dl                      | 152 µmol/l   |
| Acide ascorbique             | 5 mg/dl                        | 227 µmol/l   |
| Caféine                      | 6 mg/dl                        | 308 µmol/l   |
| Carbamazépine                | 3 mg/dl                        | 127 µmol/l   |
| Chloramphénicol              | 5 mg/dl                        | 155 µmol/l   |
| Chloridiazépoixide           | 1 mg/dl                        | 33.3 µmol/l  |
| Chlorpromazine               | 0.2 mg/dl                      | 6.27 µmol/l  |
| Cholestérol                  | 500 mg/dl                      | 12.9 mmol/l  |
| Cimétidine                   | 2 mg/dl                        | 79.2 µmol/l  |
| Créatinine                   | 30 mg/dl                       | 2652 µmol/l  |
| Dextran 40                   | 6000 mg/dl                     | 1500 µmol/l  |
| Diazépam                     | 0.5 mg/dl                      | 17.6 µmol/l  |
| Digoxine                     | 5 ng/dl                        | 6.15 nmol/l  |
| Érythromycine                | 6 mg/dl                        | 81.6 µmol/l  |
| Éthanol                      | 400 mg/dl                      | 86.8 mmol/l  |
| Éthosuximide                 | 25 mg/dl                       | 1770 µmol/l  |
| Furosémide                   | 6 mg/dl                        | 181 µmol/l   |
| Gentamicine                  | 12 mg/dl                       | 251 µmol/l   |
| Ibuprofène                   | 50 mg/dl                       | 2 425 µmol/l |
| Immunoglobuline G (IgG)      | 5 g/dl                         | 50 g/l       |
| Lidocaïne                    | 1.2 mg/dl                      | 51.2 µmol/l  |
| Chlorure de lithium          | 2.3 mg/dl                      | 3.2 mmol/l   |
| Héparine (lithium)           | 3 U/ml                         | 3000 U/l     |
| Nicotine                     | 0.1 mg/dl                      | 6.2 µmol/l   |
| Pénicilline G                | 25 U/ml                        | 25000 U/l    |
| Pentobarbital                | 8 mg/dl                        | 354 µmol/l   |
| Phénobarbital                | 10 mg/dl                       | 431 µmol/l   |
| Phénytoïne                   | 5 mg/dl                        | 198 µmol/l   |
| Primidone                    | 4 mg/dl                        | 183 µmol/l   |
| Propoxyphène                 | 0.2 mg/dl                      | 4.91 µmol/l  |
| Protéine, albumine           | 6 g/dl                         | 60 g/l       |
| Facteurs rhumatoïdes         | 500 U/ml                       | 500 U/ml     |
| Acide salicylique            | 60 mg/dl                       | 4.34 mmol/l  |
| Héparine sodique             | 3 U/ml                         | 3000 U/l     |
| Théophylline                 | 4 mg/dl                        | 222 µmol/l   |
| Urée                         | 500 mg/dl                      | 83.3 mmol/l  |
| Acide urique                 | 20 mg/dl                       | 1190 µmol/l  |
| Acide valproïque             | 50 mg/dl                       | 3467 µmol/l  |

La méthode CardioPhase<sup>®</sup> hsCRP ne présente aucun effet crochet jusqu'à 130.22 mg/dl [1302.2 mg/l].

#### Récupération

La récupération du matériel de référence de protéine ERM<sup>®</sup>-DA470 (CRM 470) a été comprise entre 96.6 et 104.1 %, avec une récupération moyenne de 99.2 %.

#### Limite de l'analyse quantitative : 0.016 mg/dl [0.16 mg/l]

La limite de l'analyse quantitative représente le point le plus bas du domaine de mesure de la CRP.

**Bibliographie :** Voir page annexe.

**Explication des Symboles :** Voir page annexe.

Dimension Vista<sup>®</sup>, Dimension<sup>®</sup>, Flex<sup>®</sup> et BN ProSpec<sup>®</sup> sont des marques commerciales de Siemens Healthcare Diagnostics.

CardioPhase<sup>®</sup> est une marque déposée aux Etas-Unis et dans d'autres pays.

ERM<sup>®</sup> est la marque déposée pour les matériaux de référence européens.

\* Sous licence brevet US 6,040,147

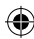

# DADE BEHRING

## Dimension Vista<sup>®</sup> System

### Flex<sup>®</sup> reagent cartridge

### hsCRP

Data di edizione 2008-02

#### CardioPhase<sup>®</sup> high sensitivity CRP

**Uso previsto:** il metodo CRP ad alta sensibilità (hsCRP) CardioPhase<sup>®</sup> è un test diagnostico *in vitro* per la determinazione quantitativa della Proteina C-Reattiva (CRP), nel siero e nel plasma eparinato umani sul sistema Dimension Vista<sup>®</sup>.

La determinazione della CRP ad alta sensibilità può essere utilizzata per la valutazione di patologie ritenute associate ai processi infiammatori, in individui altrimenti sani, e come marcatore indipendente di rischio per l'identificazione e la stratificazione dei soggetti a rischio di future patologie cardiovascolari\*. Le determinazioni della hsCRP, unitamente alla valutazione di laboratorio clinica tradizionale delle sindromi coronariche acute, possono essere utili come marcatori indipendenti per la prognosi di eventi ricorrenti, in pazienti con malattia coronarica stabile o sindromi coronariche acute.

**Riassunto:** la CRP è una delle proteine di "fase acuta", i cui livelli di siero o plasma aumentano durante la risposta generale aspecifica ai processi infiammatori infettivi e non infettivi. La CRP viene sintetizzata nel fegato ed è normalmente presente in tracce nel siero e nel plasma.

In vari studi clinici che comportano danni tissutali, infezioni o infiammazione acuta, i valori della CRP possono aumentare oltre la norma fino a 20 - 500 mg/l<sup>1</sup>. Poiché valori elevati della CRP sono sempre associati ad alterazioni patologiche, il metodo per la CRP fornisce indicazioni utili per la diagnosi, la terapia e il monitoraggio dei processi infiammatori e dei disturbi associati<sup>2,3,4</sup>. L'incremento dei valori della CRP è aspecifico e dovrebbe essere interpretato alla luce di un quadro completo dell'anamnesi clinica. Studi hanno dimostrato che la determinazione della CRP tramite i metodi ad alta sensibilità si rivela un valido indicatore predittivo indipendente di rischio per futuri disturbi cardiovascolari e vascolari periferici. Le determinazioni della CRP ad alta sensibilità, insieme ad altri marcatori, si sono dimostrate un valido metodo di valutazione dei rischi di disturbi cardiovascolari e vascolari periferici<sup>5,7,8</sup>. Elevati valori della CRP determinati mediante i metodi della CRP ad alta sensibilità possono essere indicativi della prognosi di individui con sindromi coronariche acute e possono essere utili nella gestione di tali individui<sup>9</sup>.

**Principi del metodo:** particelle di polistirene rivestite di anticorpi monoclonali CRP umana-specifici si aggregano quando vengono miscelate con campioni contenenti CRP. Tali aggregati provocano la dispersione della luce passante attraverso il campione. L'intensità della luce dispersa è proporzionale alla concentrazione della proteina nel campione. La valutazione quantitativa avviene per confronto con uno standard a concentrazione nota.

#### Reagenti

| Pozzetti <sup>a,b</sup> | Forma   | Componente                                                                                   | Concentrazione <sup>c</sup> | Tipo di campione |
|-------------------------|---------|----------------------------------------------------------------------------------------------|-----------------------------|------------------|
| 1 - 8                   | Liquido | Reagente per supplemento hsCRP:<br>Tampone fosfato;<br>Polidocanolo                          | 1.9 g/l                     |                  |
| 9 - 12                  | Liquido | Reagente per CRP ad alta sensibilità:<br>Particelle di polistirene;<br>Anticorpi monoclonali | 1 g/l<br>13 mg/l            | Topo             |

- a) I pozzetti sono numerati in sequenza a partire dall'estremità larga della cartuccia.  
b) Contiene conservanti.  
c) Valore nominale per pozzetto in una cartuccia.

#### Precauzioni:

Contiene azoturo di sodio (< 0.1 %) come conservante. L'azoturo di sodio può reagire con le tubazioni in rame o piombo nelle linee di scarico formando composti esplosivi. Provvedere allo smaltimento in modo appropriato e secondo le normative locali.

Contiene materiale di origine umana.

Ogni donatore o unità di sangue da donatore è stato analizzato e trovato negativo per il virus dell'immunodeficienza umana (HIV) 1 e 2, per il virus dell'epatite B (HBV) e per il virus dell'epatite C (HCV) utilizzando test conformi alla Direttiva per Diagnostici In Vitro in ambito europeo oppure test approvati dalla FDA. Poiché nessun test noto può garantire la totale assenza di agenti infettivi, tutti i prodotti di derivazione umana devono essere manipolati con adeguate precauzioni.

Le cuvette usate contengono materiale di origine umana; maneggiare con cura per evitare il contatto con la pelle o l'ingestione.

Per uso diagnostico *in vitro*.

#### Preparazione del reagente:

tutti i reagenti sono liquidi e pronti per l'uso.

**Conservare a:** 2 - 8 °C.

**Scadenza:** per la data di scadenza delle singole cartucce reagente ancora chiuse fare riferimento alla confezione. I pozzetti sigillati sullo strumento sono stabili per 90 giorni.

**Stabilità scomparto aperto:** 21 giorni per i pozzetti 1 - 12

#### Raccolta e manipolazione del campione:

Tipi di campioni consigliati: siero o plasma eparinato.

Il siero e il plasma possono essere raccolti applicando le procedure consigliate per la raccolta di campioni di sangue per uso diagnostico mediante venopuntura<sup>9</sup>.

Seguire le istruzioni fornite con il dispositivo di raccolta campioni per le modalità di utilizzo e di processo delle analisi<sup>10</sup>.

Per il siero, la formazione completa del coagulo deve avvenire prima della centrifugazione. Il siero o il plasma devono essere fisicamente separati dalle cellule non appena possibile con un limite massimo di due ore dal momento della raccolta<sup>11</sup>.

Utilizzare campioni freschi (conservati per non oltre sette giorni a 2 - 8 °C) o conservati congelati. I campioni possono essere conservati a temperature inferiori a -20 °C fino a otto mesi<sup>12</sup>, se sono congelati entro 24 ore dopo la raccolta e se non sono sottoposti a cicli ripetuti di congelamento/scongelo. I campioni lipemici o congelati, che sono diventati torbidi dopo lo scongelamento, devono essere chiarificati mediante centrifugazione (10 minuti a circa 15000 x g) prima di procedere ai test. I campioni devono essere privi di materiale corpuscolato.

#### Procedura

##### Materiale fornito

CardioPhase<sup>®</sup> hsCRP Flex<sup>®</sup> reagent cartridge, codice K7046

##### Materiale necessario ma non fornito

PROT2 CAL, Cod. KC780

Diluente, Cod. KS804

Materiale di controllo di qualità, come:

hsCRP CON L, Cod. KC755

hsCRP CON H, Cod. KC757

##### Schema di esecuzione

Il sistema Dimension Vista<sup>®</sup> effettua automaticamente il campionamento, l'erogazione del reagente, la miscelazione e il processo di analisi. Per informazioni dettagliate su questo processo di analisi, fare riferimento al Manuale Operatore del Dimension Vista<sup>®</sup>.

Diluizione iniziale del campione

Volume di campione (erogato nella cuvetta)  
Volume del diluente  
Reagente per CRP ad alta sensibilità  
Temperatura  
Tempo di reazione  
Lunghezza d'onda  
Tipo di misurazione

#### Condizioni del test

1:1 (accurato)  
**Cuvetta**  
1.37 µl  
  
118 µl  
27.3 µl  
37.0 °C  
5 minuti 50 secondi  
840 nm  
Nefelometrica

#### Calibrazione

Materiale di calibrazione  
Schema di calibrazione  
Unità  
  
Diluizioni tipiche dei punti di calibrazione

PROT2 CAL, Cod. KC780  
7 livelli, n = 3  
mg/dl [mg/l]<sup>d</sup>  
(mg/dl x 0.1) = [mg/l]  
0.012, 0.025, 0.056, 0.111, 0.222, 0.50, 1.0 mg/dl  
[0.12, 0.25, 0.56, 1.11, 2.22, 5.0, 10.0 mg/l]

Per ottenere punti di calibrazione che rientrino nell'intervallo di misura, PROT2 CAL viene automaticamente diluito dallo strumento con diluente ai seguenti valori:

Punto 1: diluizione 1:162  
Punto 2: diluizione 1:81  
Punto 3: diluizione 1:36  
Punto 4: diluizione 1:18  
Punto 5: diluizione 1:9  
Punto 6: diluizione 1:4  
Punto 7: diluizione 1:2  
Ogni 45 giorni per ciascun lotto

Frequenza di calibrazione

Occorre effettuare una nuova calibrazione:

- Se i risultati della verifica di calibrazione sono accettabili, è possibile ampliare l'intervallo di calibrazione.
- Quando si usa un nuovo lotto di cartucce reagente Flex<sup>®</sup>
  - In seguito a manutenzione o riparazione importante, se indicato dai risultati del controllo di qualità
  - Se indicato nelle procedure del controllo di qualità del laboratorio
  - Quando richiesto in base alle normative in vigore

d) Le [unità SI], Système International d'Unités (Sistema Internazionale di Unità) sono tra parentesi.

#### Controllo di qualità

Almeno una volta per ogni giorno di utilizzo, analizzare un minimo di due livelli di un materiale di controllo qualità (CQ) con concentrazioni note di Proteina C-Reattiva, ad esempio hsCRP CON L o H.

Seguire le procedure di controllo qualità interne del laboratorio se i risultati ottenuti non rientrano nei limiti accettabili.

**Risultati:** lo strumento calcola la concentrazione di Proteina C-Reattiva in mg/dl [mg/l] utilizzando lo schema di calcolo descritto nel Manuale Operatore del Dimension Vista<sup>®</sup>.

**I risultati del test devono essere sempre interpretati insieme all'anamnesi, al quadro clinico e ad altri dati relativi al paziente.**

**Intervallo di misura analitica (AMR): 0.016 - 0.95 mg/dl [0.16 - 9.50 mg/l]**

Si tratta dell'intervallo di misura per campioni non diluiti eseguita automaticamente dallo strumento. Se le letture ottenute sono al di fuori dell'intervallo iniziale di misura, il metodo può essere ripetuto con diluizione superiore del campione.

Per informazioni sulle misure ripetute con differenti diluizioni, consultare il Manuale Operatore del Dimension Vista<sup>®</sup>.

- I campioni che mostrano risultati superiori a 0.95 mg/dl [9.50 mg/l] possono essere rianalizzati con diluizione superiore.
- I campioni che mostrano risultati inferiori a 0.016 mg/dl [0.16 mg/l] saranno referati dallo strumento come "inferiori a 0.016 mg/dl".

#### Limiti della procedura

Torbidità e particelle nei campioni possono interferire con la determinazione. Pertanto, i campioni contenenti particelle devono essere centrifugati prima dell'analisi. I campioni lipemici o torbidi che non possono essere chiarificati mediante centrifugazione (10 minuti a circa 15000 x g) non devono essere utilizzati.

A causa dell'effetto matrice, i campioni per i controlli interlaboratorio e i campioni di controllo possono generare risultati diversi da quelli ottenuti con altri metodi. Pertanto, può essere necessario valutare i risultati in rapporto ai valori teorici metodo-specifici.

Il sistema di referenziazione dello strumento contiene flag e commenti che forniscono all'utente le informazioni relative agli errori di elaborazione dello strumento, allo stato dello strumento e ai potenziali errori nei risultati di CardioPhase<sup>®</sup> hsCRP. Per i flag e i commenti dei referti, consultare il Manuale Operatore del Dimension Vista<sup>®</sup>. Eventuali referti contenenti flag e/o commenti devono essere trattati in base al manuale di procedura del laboratorio e non devono essere referati.

È possibile che i campioni prelevati dai pazienti contengano anticorpi eterofili che potrebbero reagire negli immunodosaggi producendo risultati errati per eccesso o per difetto. Questo test è stato configurato per ridurre al minimo l'interferenza da anticorpi eterofili<sup>12</sup>. Tuttavia, non può essere garantita l'eliminazione completa di questa interferenza da tutti i campioni prelevati dai pazienti. Se il risultato del test non è in linea con il quadro clinico e la storia clinica del paziente deve essere interpretato con cautela.

#### Raccomandazioni del gruppo di esperti dell'AHA/CDC<sup>®</sup>:

Il gruppo di esperti AHA/CDC ha indicato le seguenti raccomandazioni per i limiti di utilizzo della hsCRP:

- I livelli della hsCRP non devono essere utilizzati come sostituti per la valutazione dei tradizionali fattori di rischio cardiovascolare.
- L'applicazione delle linee guida per la gestione delle sindromi coronariche acute non deve dipendere dai livelli della hsCRP.
- Quando si utilizza il test per la valutazione del rischio, valutare i pazienti con un innalzamento marcato, persistentemente inspiegabile, dei livelli della hsCRP (> 10 mg/l) dopo test ripetuti per determinare l'eziologia delle patologie non cardiovascolari.



- Il gruppo di esperti raccomanda di non effettuare lo screening della hsCRP di tutta la popolazione adulta come misura di salute pubblica.
- I pazienti che mostrano segni di infezione attiva, processi infiammatori sistemici o traumi non devono essere sottoposti a test per la valutazione del rischio di patologie cardiovascolari, fino alla scomparsa di tali condizioni.
- L'applicazione delle misure di prevenzione secondaria non deve dipendere dalla determinazione della hsCRP, ma piuttosto da una serie di fattori di rischio (valutazione del rischio globale).
- Le misure in serie della hsCRP non devono essere utilizzate per monitorare gli effetti del trattamento.
- Per la variabilità della hsCRP tra individui, sono necessarie due misure separate della hsCRP (a distanza di due settimane) prima di eseguire la valutazione del rischio.

#### Interpretazione dei risultati

Per una corretta interpretazione dei risultati, è necessario inoltre considerare eventuali e recenti danni ai tessuti, processi infiammatori o infettivi che potrebbero aver causato un aumento dei livelli della CRP.

#### Patologie cardiovascolari e vascolari periferiche

##### Valutazione del rischio:

L'utilità delle misure della hsCRP per la predizione del rischio di patologie cardiovascolari è stata esaminata in diversi studi. In una sottopopolazione di 280 individui arruolati nel Physician's Health Study, i campioni di linea di base sono stati testati per vari biomarcatori, inclusa la hsCRP. La popolazione è stata seguita per nove anni, allo scopo di valutare lo sviluppo di arteriopatia periferica (PAD). Il grafico seguente mostra il rischio relativo (intervallo di confidenza del 95 %) di sviluppare arteriopatia periferica in funzione del quartile della hsCRP<sup>13</sup>.

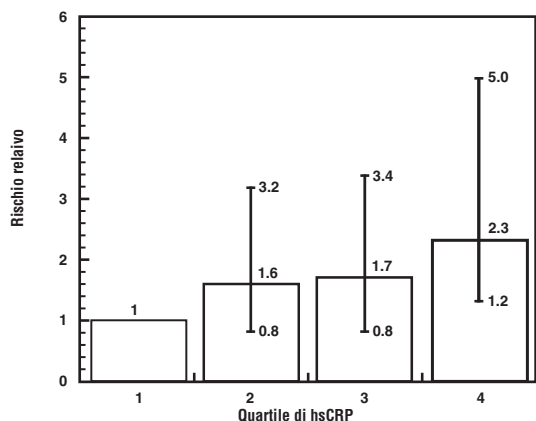

Il AHA/CDC Scientific Statement<sup>6</sup> fornisce le seguenti linee guida per la valutazione del rischio:

| Rischio | hsCRP (mg/l) |
|---------|--------------|
| Basso   | < 1.0        |
| Medio   | 1.0 - 3.0    |
| Elevato | > 3.0        |

#### Stratificazione del rischio:

Per i pazienti con sindromi coronariche acute, la determinazione della hsCRP può fornire informazioni prognostiche. È stato dimostrato che un valore della CRP > 10 mg/l nel periodo iniziale (6 - 24 ore dall'insorgenza dei sintomi) indica un aumento del rischio per eventi cardiaci ricorrenti a breve termine (30 giorni - 1 anno)<sup>5</sup>.

Un sottostudio su 447 pazienti nello studio clinico CAPTURE ha esaminato le implicazioni cliniche dei livelli elevati della CRP per la stratificazione del rischio nei pazienti con angina instabile. Come illustrato nel grafico seguente, i pazienti con un valore della CRP > 10 mg/l presentavano un tasso di eventi più alto (mortalità o IM) rispetto ai pazienti con un valore della CRP < 10 mg/l<sup>14</sup>.

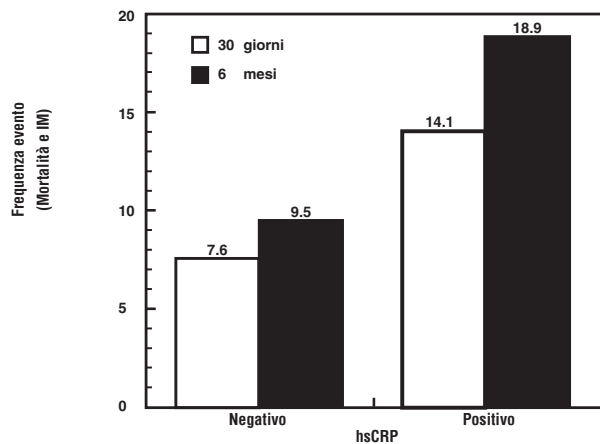

Valori attesi: inferiori a 0.30 mg/dl [3.00 mg/l].

Questo intervallo di riferimento si applica a campioni di siero di adulti sani<sup>15,16</sup>.

Gli intervalli di riferimento sono influenzati da molteplici fattori che possono differire per ciascuna popolazione oggetto di studio; ogni laboratorio deve stabilire un proprio intervallo di riferimento per *CardioPhase*<sup>®</sup> hsCRP da utilizzare con il sistema Dimension Vista<sup>®</sup>.

#### Ripetibilità massima osservata

Le deviazioni standard (DS) massime osservate (precisione intra serie) con n = 5 ripetizioni per le seguenti concentrazioni nominali di CRP sono:

| Concentrazione CRP  | DS massima accettabile |
|---------------------|------------------------|
| 0.10 mg/dl [1 mg/l] | 0.03 mg/dl [0.26 mg/l] |
| 0.30 mg/dl [3 mg/l] | 0.06 mg/dl [0.64 mg/l] |

Se la DS massima accettabile viene superata è possibile che sia presente un malfunzionamento del sistema.

#### Caratteristiche specifiche di prestazione

I seguenti dati rappresentano le prestazioni tipiche del sistema Dimension Vista<sup>®</sup>.

#### Precisione<sup>17\*</sup>

| Materiale     | Media |        | Deviazione standard mg/dl (mg/l) (% CV) |        |                |       |        |       |
|---------------|-------|--------|-----------------------------------------|--------|----------------|-------|--------|-------|
|               | mg/dl | [mg/l] | Ripetibilità                            |        | In laboratorio |       |        |       |
| hsCRP CON L   | 0.115 | [1.15] | 0.006                                   | [0.06] | (4.8)          | 0.006 | [0.06] | (5.4) |
| hsCRP CON H   | 0.346 | [3.46] | 0.014                                   | [0.14] | (4.0)          | 0.015 | [0.15] | (4.4) |
| Pool di siero | 0.239 | [2.39] | 0.013                                   | [0.13] | (5.2)          | 0.013 | [0.13] | (5.2) |
| Pool di siero | 0.650 | [6.50] | 0.033                                   | [0.33] | (5.0)          | 0.037 | [0.37] | (5.7) |
| Pool di siero | 0.772 | [7.72] | 0.036                                   | [0.36] | (4.6)          | 0.042 | [0.42] | (5.4) |

e) È stato usato CLSI/NCCLS EP5-A2. Durante ciascuno dei 20 giorni di test sono state analizzate due serie separate con due campioni per ogni materiale.

#### Confronto dei metodi<sup>18</sup>

| Metodo di confronto                                                       | Statistiche di regressione <sup>1</sup> |                |                              | n                |
|---------------------------------------------------------------------------|-----------------------------------------|----------------|------------------------------|------------------|
|                                                                           | Pendenza                                | Intercetta     | Coefficiente di correlazione |                  |
| <i>CardioPhase</i> <sup>®</sup> hsCRP sul sistema BN ProSpec <sup>®</sup> | 1.044                                   | 0.0003 [0.003] | 0.995                        | 133 <sup>9</sup> |

f) È stato usato CLSI/NCCLS EP9-A2. Per l'adattamento con la linea di regressione lineare è stato usato il metodo Passing Bablok.

g) L'intervallo dei valori di CRP nello studio di correlazione era 0.0169 mg/dl - 0.8922 mg/dl [0.169 mg/l - 8.922 mg/l].

#### Specificità

##### Interferenza EIL

Il metodo *CardioPhase*<sup>®</sup> hsCRP è stato valutato per interferenze secondo CLSI/NCCLS EP7-A2<sup>19</sup>. La differenza è la deviazione espressa in percentuale tra i risultati ottenuti con il campione di controllo (senza sostanza interferente) e quelli ottenuti con il campione sottoposto a test (con sostanza interferente). Una differenza superiore al 10 % è considerata interferenza.

| Sostanza analizzata        | Concentrazione della sostanza                                         | CRP mg/dl [mg/l] | Differenza % |    |
|----------------------------|-----------------------------------------------------------------------|------------------|--------------|----|
| Emoglobina (emolisi)       | 1000 mg/dl                                                            | [0.155 mmol/l]   | 0.093 [0.93] | +1 |
| Bilirubina (non coniugata) | 60 mg/dl                                                              | [1026 µmol/l]    | 0.097 [0.97] | -3 |
| Bilirubina (coniugata)     | 60 mg/dl                                                              | [1026 µmol/l]    | 0.097 [0.97] | +1 |
| Lipemia                    | Fare riferimento alla sezione „Raccolta e manipolazione dei campioni“ |                  |              |    |

\* I risultati dell'analisi non devono essere corretti in base a questa differenza.

#### Sostanze non interferenti

Le sostanze seguenti non interferiscono con il metodo *CardioPhase*<sup>®</sup> hsCRP quando sono presenti nel siero e nel plasma nelle concentrazioni indicate. Le inaccuratezze (differenze) dovute a queste sostanze sono inferiori al 10 % a una concentrazione del metodo CRP pari a 0.023 mg/dl - 0.591 mg/dl [0.23 mg/l - 5.91 mg/l].

| Sostanza                | Concentrazione del test | Unità SI    |
|-------------------------|-------------------------|-------------|
| Acetaminofene           | 0.025 mg/dl             | 1.66 µmol/l |
| Amikacina               | 15 mg/dl                | 256 µmol/l  |
| Ammonio eparina         | 3 U/ml                  | 3000 U/l    |
| Ampicillina             | 5.3 mg/dl               | 152 µmol/l  |
| Acido ascorbico         | 5 mg/dl                 | 227 µmol/l  |
| Caffeina                | 6 mg/dl                 | 308 µmol/l  |
| Carbamazepina           | 3 mg/dl                 | 127 µmol/l  |
| Cloramfenicolo          | 5 mg/dl                 | 155 µmol/l  |
| Clordiazepossido        | 1 mg/dl                 | 33.3 µmol/l |
| Clorpromazina           | 0.2 mg/dl               | 6.27 µmol/l |
| Colesterolo             | 500 mg/dl               | 12.9 mmol/l |
| Cimetidina              | 2 mg/dl                 | 79.2 µmol/l |
| Creatinina              | 30 mg/dl                | 2652 µmol/l |
| Destrano 40             | 6000 mg/dl              | 1500 µmol/l |
| Diazepam                | 0.5 mg/dl               | 17.6 µmol/l |
| Digossina               | 5 ng/dl                 | 6.15 nmol/l |
| Eritromicina            | 6 mg/dl                 | 81.6 µmol/l |
| Etanolo                 | 400 mg/dl               | 86.8 mmol/l |
| Etosuccimide            | 25 mg/dl                | 1770 µmol/l |
| Furosemide              | 6 mg/dl                 | 181 µmol/l  |
| Gentamicina             | 12 mg/dl                | 251 µmol/l  |
| Ibuprofene              | 50 mg/dl                | 2425 µmol/l |
| Immunoglobulina G (IgG) | 5 g/dl                  | 50 g/l      |
| Lidocaina               | 1.2 mg/dl               | 51.2 µmol/l |
| Cloruro di litio        | 2.3 mg/dl               | 3.2 mmol/l  |
| Eparina di litio        | 3 U/ml                  | 3000 U/l    |
| Nicotina                | 0.1 mg/dl               | 6.2 µmol/l  |
| Penicillina G           | 25 U/ml                 | 25000 U/l   |
| Pentobarbital           | 8 mg/dl                 | 354 µmol/l  |
| Fenobarbital            | 10 mg/dl                | 431 µmol/l  |
| Fenitoina               | 5 mg/dl                 | 198 µmol/l  |
| Primidone               | 4 mg/dl                 | 183 µmol/l  |
| Propossifene            | 0.2 mg/dl               | 4.91 µmol/l |
| Proteina albumina       | 6 g/dl                  | 60 g/l      |
| Fattore reumatoide      | 500 U/ml                | 500 U/ml    |
| Acido salicilico        | 60 mg/dl                | 4.34 mmol/l |
| Eparina di sodio        | 3 U/ml                  | 3000 U/l    |
| Teofilina               | 4 mg/dl                 | 222 µmol/l  |
| Urea                    | 500 mg/dl               | 83.3 mmol/l |
| Acido urico             | 20 mg/dl                | 1190 µmol/l |
| Acido valproico         | 50 mg/dl                | 3467 µmol/l |

Il metodo *CardioPhase*<sup>®</sup> hsCRP non presenta effetto gancio fino a 130.22 mg/dl [1302.2 mg/l].

#### Recupero

Il recupero del materiale di riferimento delle proteine ERM<sup>®</sup>-DA470 (CRM 470) variava da 96.6 a 104.1 % con un recupero medio del 99.2 %.

**Limite di quantificazione: 0.016 mg/dl [0.16 mg/l]**

Il limite di quantificazione indica il limite inferiore dell'intervallo di misura di CRP.

**Bibliografia:** Vedere la sezione aggiunta.

**Interpretazione simboli:** Vedere la sezione aggiunta.

Dimension Vista<sup>®</sup>, Dimension<sup>®</sup>, Flex<sup>®</sup> e BN ProSpec<sup>®</sup> sono marchi di Siemens Healthcare Diagnostics.

*CardioPhase*<sup>®</sup> è un marchio registrato negli Stati Uniti e in altri paesi.

ERM<sup>®</sup> è il marchio registrato dei materiali di riferimento europei.

\* Rilasciato sotto Brevetto US 6,040,147

# DADE BEHRING

## Dimension Vista<sup>®</sup> System

### Flex<sup>®</sup> reagent cartridge

### hsCRP

Fecha de la edición 2008-02

#### CardioPhase<sup>®</sup> high sensitivity CRP

**Uso previsto:** El método de CRP de alta sensibilidad (hsCRP) CardioPhase<sup>®</sup> es una prueba de diagnóstico *in vitro* para la medición cuantitativa del complemento de la proteína C reactiva (CRP) en suero y plasma heparinizado humanos en el sistema Dimension Vista<sup>®</sup>.

Las determinaciones de la CRP de alta sensibilidad pueden utilizarse en la evaluación de estados que se consideren asociados a procesos inflamatorios en pacientes que, aparte de eso, estén sanos. Asimismo, pueden utilizarse como un marcador de riesgo independiente para la identificación y estratificación de personas que corren el riesgo de desarrollar enfermedades cardiovasculares en el futuro\*. Cuando se utilizan conjuntamente con la evaluación tradicional en laboratorio clínico de síndromes coronarios agudos, las mediciones de hsCRP pueden resultar útiles como un marcador independiente del pronóstico de sucesos recurrentes en pacientes con enfermedades coronarias estables o síndromes coronarios agudos.

**Resumen:** La proteína C reactiva (CRP) es una de las proteínas de la "fase aguda", cuyos niveles en suero o plasma aumentan durante la respuesta general y no específica a procesos inflamatorios tanto infecciosos como no infecciosos. La CRP es sintetizada en el hígado y generalmente se encuentra, en cantidades mínimas, en el suero y el plasma.

En diversos estados de enfermedad que dan lugar a lesiones de los tejidos, infección o inflamación aguda, los valores de CRP pueden aumentar por encima de los valores normales hasta alcanzar 20 - 500 mg/L<sup>1</sup>. Puesto que los niveles elevados de CRP siempre se asocian a cambios patológicos, el método de CRP proporciona información útil para el diagnóstico, el tratamiento y el control de procesos inflamatorios y enfermedades asociadas<sup>2,3,4</sup>. Los aumentos de los valores de CRP son no específicos y no se deben interpretar sin una historia clínica completa. Los estudios han mostrado que la medición de CRP por medio de métodos de alta sensibilidad es un importante elemento predictivo independiente del riesgo de sufrir en el futuro enfermedades cardiovasculares y enfermedades vasculares periféricas<sup>5</sup>. También se ha demostrado que las mediciones de la CRP de alta sensibilidad aumentan el valor predictivo de otros marcadores utilizados para evaluar el riesgo de sufrir enfermedades cardiovasculares y enfermedades vasculares<sup>6,7,8</sup>. Los valores elevados de CRP determinados por medio de los métodos de CRP de alta sensibilidad pueden ser indicativos del pronóstico de personas con síndromes coronarios agudos, y pueden resultar útiles para el tratamiento de las personas que sufren tales enfermedades<sup>9</sup>.

**Principios del procedimiento:** Se añaden partículas de poliestireno recubiertas de anticuerpos monoclonales propios de la CRP humana y se mezclan con muestras que contienen CRP. Estos agregados dispersan un haz de luz que atraviesa la muestra. La intensidad de la luz dispersada es proporcional a la concentración de la proteína respectiva de la muestra. El resultado se evalúa mediante comparación con una concentración conocida estándar.

#### Reactivos

| Pocillos <sup>a,b</sup> | Forma   | Ingrediente                                                                                   | Concentración <sup>c</sup> | Origen |
|-------------------------|---------|-----------------------------------------------------------------------------------------------|----------------------------|--------|
| 1 - 8                   | Líquido | Reactivo suplemento de hsCRP:<br>Tampón fosfato;<br>Polidocanol                               | 1.9 g/L                    |        |
| 9 - 12                  | Líquido | Reactivo CRP de alta sensibilidad:<br>Partículas de poliestireno;<br>Anticuerpos monoclonales | 1 g/L<br>13 mg/L           | Ratón  |

- a) Los pocillos están numerados consecutivamente desde el extremo ancho del cartucho.  
b) Contienen conservantes.  
c) Valor nominal por pocillo en un cartucho.

#### Precauciones:

Contiene azida de sodio (< 0.1 %) como conservante. La azida de sodio puede reaccionar con tuberías de cobre o de plomo en los conductos de drenaje y formar compuestos explosivos. Elimine este producto de forma apropiada conforme a la normativa local.

Contiene material de origen humano.

Cada donante o unidad de donación, ha sido analizada para detectar la presencia del virus de inmunodeficiencia humana 1 y 2 (VIH), virus de la hepatitis B (VHB) y virus de la hepatitis C (VHC), utilizando las técnicas aprobadas por la directiva de diagnósticos *in-vitro* de la UE o FDA. Para la elaboración del producto se han utilizado únicamente las donaciones con resultados negativos. Como no hay ninguna prueba que ofrezca la completa seguridad de ausencia de agentes infecciosos, todos los productos obtenidos a partir de material de origen humano, deben ser manipulados con las debidas precauciones.

Las cubetas usadas contienen fluidos corporales humanos por lo que deben manipularse con cuidado para evitar la ingestión y el contacto con la piel.

Para uso diagnóstico *in vitro*.

#### Preparación del reactivo:

Todos los reactivos son líquidos y están listos para su uso.

**Conservar a:** 2 - 8 °C.

**Fecha de caducidad:** Consulte en la caja la fecha de caducidad de los cartuchos de reactivos individuales cerrados. Los pocillos del cartucho sellados en el instrumento son estables durante 90 días.

**Estabilidad de los pocillos abiertos:** 21 días para los pocillos 1 - 12

#### Recogida y preparación de las muestras:

Tipos de muestras recomendadas: suero o plasma heparinizado.

El suero y el plasma se pueden recoger utilizando los procedimientos recomendados para la obtención de muestras de sangre mediante venopunción<sup>9</sup>.

Siga las instrucciones de uso y procesamiento suministradas con el dispositivo de recogida de muestras<sup>10</sup>.

El suero debe estar totalmente coagulado antes de la centrifugación. El suero y el plasma deben separarse físicamente de las células lo antes posible en el plazo límite de las dos horas posteriores a la recogida de la muestra<sup>11</sup>.

Las muestras deben ser lo más frescas posibles (no almacenar más de siete días a 2 - 8 °C) o estar congeladas. Las muestras pueden almacenarse por debajo de -20 °C hasta ocho meses<sup>20</sup> si se congelan antes de que transcurran 24 horas tras su recogida y si no se han realizado ciclos repetidos de congelación y descongelación. Las muestras lipémicas o congeladas, que presentan un aspecto turbio después de descongelarse, deben clarificarse mediante centrifugación (10 minutos a aproximadamente 15000 x g) con anterioridad a las pruebas. Las muestras deben estar libres de partículas.

#### Procedimiento

##### Materiales suministrados

CardioPhase<sup>®</sup> hsCRP Flex<sup>®</sup> reagent cartridge, Referencia K7046

##### Materiales necesarios que no se suministran

PROT2 CAL, Referencia KC780

Diluyente del sistema, Referencia KS804

Materiales de control de calidad tales como:

hsCRP CON L, Referencia KC755

hsCRP CON H, Referencia KC757

#### Proceso de análisis

El sistema Dimension Vista<sup>®</sup> realiza automáticamente el muestreo, la dispensación de reactivos, la mezcla y el procesamiento. Para obtener más detalles sobre este proceso, consulte el Manual del usuario de Dimension Vista<sup>®</sup>.

|                                              | Condiciones del análisis |
|----------------------------------------------|--------------------------|
| Dilución inicial de muestra                  | 1:1 (sin dilución)       |
|                                              | <b>Cubeta</b>            |
| Volumen de muestra (dispensado en la cubeta) | 1.37 µL                  |
| Volumen de diluyente                         | 118 µL                   |
| Reactivo CRP de alta sensibilidad            | 27.3 µL                  |
| Temperatura                                  | 37.0 °C                  |
| Tiempo de reacción                           | 5 minutos y 50 segundos  |
| Longitud de onda                             | 840 nm                   |
| Tipo de medición                             | Nefelométrica            |

#### Calibración

|                                |                                                                                                      |
|--------------------------------|------------------------------------------------------------------------------------------------------|
| Material de calibración        | PROT2 CAL, Referencia KC780                                                                          |
| Esquema de calibración         | 7 niveles, n = 3                                                                                     |
| Unidades                       | mg/dL [mg/L] <sup>d</sup><br>(mg/dL x 0.1) = [mg/L]                                                  |
| Niveles de calibración típicos | 0.012, 0.025, 0.056, 0.111, 0.222, 0.50, 1.0 mg/dL<br>[0.12, 0.25, 0.56, 1.11, 2.22, 5.0, 10.0 mg/L] |

Para obtener niveles de calibrador que estén dentro del intervalo de medición, el instrumento diluye automáticamente PROT2 CAL con el Diluyente del sistema obteniendo las diluciones siguientes:

Nivel 1: dilución 1:162

Nivel 2: dilución 1:81

Nivel 3: dilución 1:36

Nivel 4: dilución 1:18

Nivel 5: dilución 1:9

Nivel 6: dilución 1:4

Nivel 7: dilución 1:2

Cada 45 días para cualquier lote

El intervalo de la calibración se puede ampliar en una verificación aceptable de la calibración.

Se requiere una nueva calibración:

- Para cada nuevo lote de cartuchos de reactivos Flex<sup>®</sup>
- Después de la realización de importantes tareas de mantenimiento o servicio, si así lo indican los resultados del control de calidad
- Tal como se indica en los procedimientos de control de calidad del laboratorio
- Cuando sea necesario por normativa gubernamental

d) Las unidades del Système International d'Unités [unidades SI] se indican entre paréntesis.

#### Control de calidad

Al menos una vez cada día que se utilice, analice como mínimo dos niveles de un producto de control de calidad (CC) con concentraciones conocidas de proteína C reactiva, por ejemplo, hsCRP CON L o H.

Siga los procedimientos internos de CC de su laboratorio si los resultados obtenidos están fuera de los límites aceptables.

**Resultados:** El instrumento calcula la concentración de proteína C reactiva en mg/dL [mg/L] utilizando el patrón de cálculo descrito en el Manual del usuario de Dimension Vista<sup>®</sup>.

**Los resultados de este análisis deben interpretarse siempre conjuntamente con la historia clínica del paciente, la presentación clínica y otros hallazgos.**

**Intervalo de medición analítica (AMR): 0.016 - 0.95 mg/dL [0.16 - 9.50 mg/L]**

Es el intervalo de medición para muestras sin diluir que procesa el instrumento de forma automática. Si las lecturas obtenidas están fuera del intervalo de medición inicial, el método puede repetirse utilizando una dilución mayor de la muestra.

Consulte el Manual del usuario de Dimension Vista<sup>®</sup> para obtener más información sobre las mediciones repetidas utilizando otras diluciones.

- Las muestras con resultados superiores a 0.95 mg/dL [9.50 mg/L] pueden repetirse con una dilución superior.
- El instrumento considerará las muestras con resultados inferiores a 0.016 mg/dL [0.16 mg/L] "inferiores a 0.016 mg/dL".

#### Limitaciones del procedimiento

La turbidez y la presencia de partículas en las muestras pueden interferir con la determinación. Por ello, las muestras que contienen partículas deben centrifugarse antes del análisis. No deben utilizarse aquellas muestras lipémicas o turbias que no puedan clarificarse mediante centrifugación (10 minutos a aproximadamente 15000 x g).

Debido a efectos de matriz, las muestras de estudios interlaboratorios y las muestras de control pueden dar lugar a resultados que difieren de los obtenidos con otros métodos. Por ello puede ser necesario evaluar estos resultados en relación con los valores objetivo específicos del método.

El sistema de generación de informes del instrumento incluye alarmas y comentarios que proporcionan al usuario información relativa a los errores de procesamiento del instrumento, información del estado de éste y posibles errores en los resultados de hsCRP CardioPhase<sup>®</sup>. Consulte el Manual del usuario de Dimension Vista<sup>®</sup> para conocer el significado de las alarmas y comentarios de los informes. Cualquier informe que contenga alarmas y/o comentarios se debe tratar siguiendo el manual de procedimiento de su laboratorio y no se debe informar sobre él.

Las muestras de pacientes pueden contener anticuerpos heterofílicos que pueden reaccionar en los inmunoensayos y dar lugar a resultados falsamente elevados o reducidos. Este ensayo está diseñado para minimizar la interferencia de los anticuerpos heterofílicos<sup>12</sup>. Sin embargo, no puede garantizarse la completa eliminación de esta interferencia en todas las muestras de pacientes. El resultado de una prueba que no es coherente con el cuadro clínico y el historial del paciente debería ser interpretado con cuidado.

#### Recomendaciones del grupo de expertos de AHA/CDC<sup>13</sup>

El grupo de expertos de AHA/CDC recomienda lo siguiente en cuanto a las limitaciones de uso de hsCRP:

- Los niveles de hsCRP no deberían reemplazar la evaluación de los factores de riesgo cardiovasculares tradicionales.
- La aplicación de directrices de tratamiento de síndromes coronarios agudos no debería depender de los niveles de hsCRP.

- Cuando se utilice el ensayo para la evaluación del riesgo, los pacientes que presenten una elevación marcada y persistentemente sin explicación de hsCRP (>10 mg/L) después de realizar análisis repetidos deberían evaluarse para determinar la posible existencia de etiologías no cardiovasculares.
- El grupo de expertos se muestra contrario al diagnóstico sistemático (*screening*) de toda la población de adultos para la determinación de los niveles de hsCRP como medida de sanidad pública.
- Los pacientes con indicios de infección activa, procesos inflamatorios sistémicos o traumatismo no deberían someterse a pruebas para la evaluación del riesgo de contraer enfermedades cardiovasculares hasta que hayan remitido estos trastornos.
- La aplicación de medidas de prevención secundarias no debería depender de la determinación de los niveles de hsCRP, sino que debe tenerse en cuenta una serie de factores de riesgo (evaluación global del riesgo).
- No se deben utilizar mediciones en serie de los niveles de hsCRP para controlar los efectos del tratamiento.
- Antes de realizar la evaluación del riesgo deberían obtenerse dos mediciones independientes de los niveles de hsCRP (en condiciones óptimas, con un intervalo de dos semanas), debido a la variabilidad de los niveles de hsCRP en cada paciente.

#### Interpretación de los resultados

A la hora de interpretar los resultados también deberían tenerse en cuenta los eventos médicos recientes que dan lugar a lesiones de los tejidos, infección o inflamación, que pueden provocar niveles elevados de CRP.

#### Enfermedades cardiovasculares y vasculares periféricas

##### Evaluación del riesgo:

Varios estudios han examinado la utilidad de las mediciones de hsCRP para la predicción del riesgo de contraer enfermedades cardiovasculares. En un subconjunto de 280 personas que participaron en el estudio Physician's Health Study, se analizaron muestras basales para determinar los niveles de una serie de marcadores biológicos, incluida la hsCRP. Se realizó un seguimiento de la población durante nueve años para evaluar el desarrollo de enfermedades arteriales periféricas (EAP). En el gráfico siguiente se muestra el riesgo relativo (intervalo de confianza del 95 %) de desarrollar EAP en el futuro como una función del cuartil de hsCRP<sup>13</sup>.

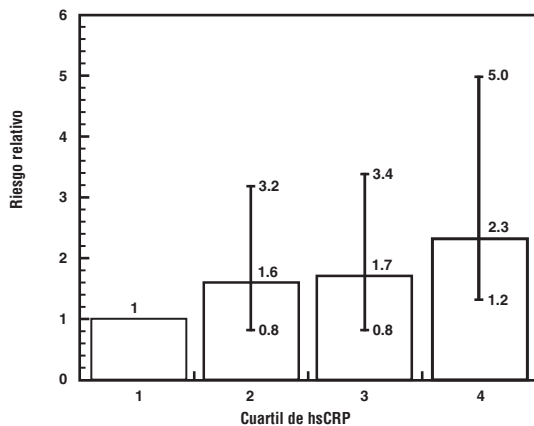

La declaración científica de AHA/CDC<sup>5</sup> ofrece las siguientes directrices para la evaluación de riesgos:

| Riesgo | hsCRP (mg/L) |
|--------|--------------|
| Bajo   | < 1.0        |
| Medio  | 1.0 - 3.0    |
| Alto   | > 3.0        |

#### Estratificación del riesgo:

En el caso de pacientes con síndromes coronarios agudos, la medición de hsCRP puede proporcionar información de pronóstico. Se ha demostrado que un valor de CRP > 10 mg/L en el primer periodo (6 - 24 horas posteriores al inicio de los síntomas) es indicativo de un mayor riesgo de eventos cardíacos recurrentes a corto plazo (entre 30 días y 1 año)<sup>3</sup>.

Un subestudio de 447 pacientes realizado en el ensayo CAPTURE examinó las consecuencias clínicas de los niveles elevados de CRP para la estratificación del riesgo en pacientes con angina inestable. Como se muestra en el gráfico siguiente, los pacientes con un nivel de CRP >10 mg/L experimentaron un índice de eventos (mortalidad o IM) más alto que los pacientes con un nivel de CRP <10 mg/L<sup>14</sup>.

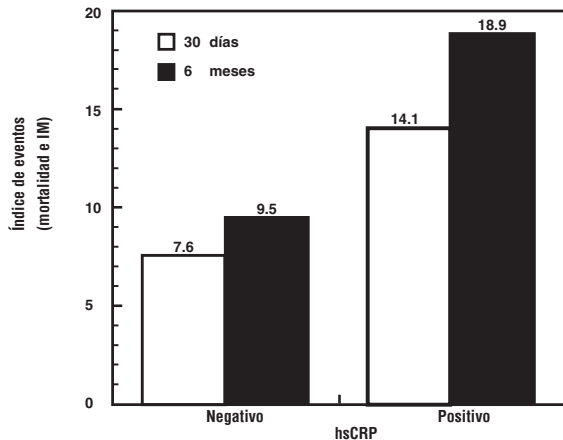

#### Valores esperados: menos de 0.30 mg/dL [3.00 mg/L]

Este intervalo de referencia se aplica a muestras de suero de adultos sanos<sup>15,16</sup>.

Los intervalos de referencia se ven afectados por numerosos factores que varían en cada población estudiada, por lo que cada laboratorio debe establecer sus propios valores esperados para *hsCRP CardioPhase*® procesados en el sistema Dimension Vista®.

#### Repetibilidad máxima observada

Las desviaciones estándar (SD) máximas que se esperan en función de los datos recogidos para la repetibilidad (precisión intraserie) utilizando 5 duplicados con las siguientes concentraciones nominales de CRP son:

| Concentración de CRP | SD máxima aceptable    |
|----------------------|------------------------|
| 0.10 mg/dL [1 mg/L]  | 0.03 mg/dL [0.26 mg/L] |
| 0.30 mg/dL [3 mg/L]  | 0.06 mg/dL [0.64 mg/L] |

Es posible que el sistema no funcione correctamente si se excede la SD máxima aceptable.

#### Características específicas de funcionamiento

Los siguientes datos representan el rendimiento típico para el sistema Dimension Vista®.

Dade Behring Marburg GmbH  
Emil-von-Behring-Str. 76  
35041 Marburg/Germany  
www.dadebehring.com

#### Precisión<sup>17,a</sup>

| Material      | Media |        | Desviación estándar mg/dL [mg/L] (% CV) |        |           |        |
|---------------|-------|--------|-----------------------------------------|--------|-----------|--------|
|               | mg/dL | [mg/L] | Repetibilidad                           | (4.8)  | Intralab. | (5.4)  |
| hsCRP CON L   | 0.115 | [1.15] | 0.006                                   | [0.06] | 0.006     | [0.06] |
| hsCRP CON H   | 0.346 | [3.46] | 0.014                                   | [0.14] | 0.015     | [0.15] |
| Pool de suero | 0.239 | [2.39] | 0.013                                   | [0.13] | 0.013     | [0.13] |
| Pool de suero | 0.650 | [6.50] | 0.033                                   | [0.33] | 0.037     | [0.37] |
| Pool de suero | 0.772 | [7.72] | 0.036                                   | [0.36] | 0.042     | [0.42] |

e) Se utilizó CLSI/NCCLS EP5-A2. Durante 20 días, se analizaron cada día dos ensayos independientes, con dos muestras de prueba para cada material de prueba.

#### Comparación de métodos<sup>18</sup>

| Método comparativo                           | Estadísticas de regresión <sup>1</sup> |                           |                             | n                |
|----------------------------------------------|----------------------------------------|---------------------------|-----------------------------|------------------|
|                                              | Pendiente                              | Intersección mg/dL [mg/L] | Coefficiente de correlación |                  |
| hsCRP CardioPhase® en el sistema BN ProSpec® | 1.044                                  | 0.0003 [0.003]            | 0.995                       | 133 <sup>a</sup> |

f) Se utilizó CLSI/NCCLS EP9-A2. El método utilizado para ajustar la línea de regresión lineal fue el análisis de Passing Bablok.

g) El intervalo de valores de CRP del estudio de correlación fue de 0.0169 mg/dL a 0.8922 mg/dL [0.169 mg/L a 8.922 mg/L].

#### Especificidad

##### Interferencia de HIL

Se evaluó la presencia de sustancias de interferencia con el método *hsCRP CardioPhase*® de acuerdo con CLSI/NCCLS EP7-A2<sup>19</sup>. Las inexactitudes sistemáticas (deriva) son la diferencia en los resultados entre la muestra de control (sin sustancia de interferencia) y la muestra de prueba (con sustancia de interferencia) expresada en porcentaje. Un valor de deriva superior a 10 % se considera interferencia.

| Sustancia analizada        | Concentración de sustancia                                | CRP mg/dL [mg/L] | Deriva <sup>*</sup> % |
|----------------------------|-----------------------------------------------------------|------------------|-----------------------|
| Hemoglobina (hemolizado)   | 1000 mg/dL                                                | [0.155 mmol/L]   | 0.093 [0.93]          |
| Bilirrubina (no conjugada) | 60 mg/dL                                                  | [1026 µmol/L]    | 0.097 [0.97]          |
| Bilirrubina (conjugada)    | 60 mg/dL                                                  | [1026 µmol/L]    | 0.097 [0.97]          |
| Lipemia                    | Consulte la sección "Recogida de muestras y manipulación" |                  |                       |

\* Los resultados del análisis no deben corregirse basándose en esta deriva.

#### Sustancias que no interfieren

Las siguientes sustancias no interfieren con el método *hsCRP CardioPhase*® si existen en suero y plasma en las concentraciones indicadas. La inexactitud (deriva) provocada por estas sustancias es inferior al 10 % con una concentración de CRP entre 0.023 mg/dL y 0.591 mg/dL [0.23 mg/L y 5.91 mg/L].

| Sustancia               | Concentración de prueba | Unidades SI |
|-------------------------|-------------------------|-------------|
| Acetaminofeno           | 0.025 mg/dL             | 1.66 µmol/L |
| Amikacina               | 15 mg/dL                | 256 µmol/L  |
| Heparina amónica        | 3 U/mL                  | 3000 U/L    |
| Ampicilina              | 5.3 mg/dL               | 152 µmol/L  |
| Ácido ascórbico         | 5 mg/dL                 | 227 µmol/L  |
| Cafeína                 | 6 mg/dL                 | 308 µmol/L  |
| Carbamacepina           | 3 mg/dL                 | 127 µmol/L  |
| Cloranfenicol           | 5 mg/dL                 | 155 µmol/L  |
| Clordacepóxido          | 1 mg/dL                 | 33.3 µmol/L |
| Clorpromacina           | 0.2 mg/dL               | 6.27 µmol/L |
| Colesterol              | 500 mg/dL               | 12.9 mmol/L |
| Cimetidina              | 2 mg/dL                 | 79.2 µmol/L |
| Creatinina              | 30 mg/dL                | 2652 µmol/L |
| Dextrano 40             | 6000 mg/dL              | 1500 µmol/L |
| Diazepam                | 0.5 mg/dL               | 17.6 µmol/L |
| Digoxina                | 5 ng/mL                 | 6.15 nmol/L |
| Eritromicina            | 6 mg/dL                 | 81.6 µmol/L |
| Etanol                  | 400 mg/dL               | 86.8 mmol/L |
| Etosuximida             | 25 mg/dL                | 1770 µmol/L |
| Furosemida              | 6 mg/dL                 | 181 µmol/L  |
| Gentamicina             | 12 mg/dL                | 251 µmol/L  |
| Ibuprofeno              | 50 mg/dL                | 2425 µmol/L |
| Inmunoglobulina G (IgG) | 5 g/dL                  | 50 g/L      |
| Lidocaína               | 1.2 mg/dL               | 51.2 µmol/L |
| Cloruro sódico          | 2.3 mg/dL               | 3.2 mmol/L  |
| Heparina de litio       | 3 U/mL                  | 3000 U/L    |
| Nicotina                | 0.1 mg/dL               | 6.2 µmol/L  |
| Penicilina G            | 25 U/mL                 | 25000 U/L   |
| Pentobarbital           | 8 mg/dL                 | 354 µmol/L  |
| Fenobarbital            | 10 mg/dL                | 431 µmol/L  |
| Fenitoina               | 5 mg/dL                 | 198 µmol/L  |
| Primidona               | 4 mg/dL                 | 183 µmol/L  |
| Propoxifeno             | 0.2 mg/dL               | 4.91 µmol/L |
| Proteína de albúmina    | 6 g/dL                  | 60 g/L      |
| Factores reumatoides    | 500 IU/mL               | 500 IU/mL   |
| Ácido salicílico        | 60 mg/dL                | 4.34 mmol/L |
| Heparina de sodio       | 3 U/mL                  | 3000 U/L    |
| Teofilina               | 4 mg/dL                 | 222 µmol/L  |
| Urea                    | 500 mg/dL               | 83.3 mmol/L |
| Ácido úrico             | 20 mg/dL                | 1190 µmol/L |
| Ácido valproico         | 50 mg/dL                | 3467 µmol/L |

El método *hsCRP CardioPhase*® no presenta efecto prozona alguno hasta 130.22 mg/dL [1302.2 mg/L].

#### Recuperación

La recuperación de proteína del material de referencia ERM®-DA470 (CRM 470) oscilaba entre el 96.6 y el 104.1 %, con una recuperación media del 99.2 %.

#### Límite de cuantificación: 0.016 mg/dL [0.16 mg/L]

El límite de cuantificación representa el punto más bajo del intervalo informable para CRP.

**Bibliografía:** Ver hoja adjunta.

**Clave de los Símbolos:** Ver hoja adjunta.

Dimension Vista®, Dimension®, Flex® y BN ProSpec® son marcas comerciales de Siemens Healthcare Diagnostics.

*CardioPhase*® es una marca comercial registrada en EE.UU. y otros países.

ERM® es una marca comercial registrada de European Reference Materials.

\* Autorizado bajo la patente US 6,040,147

**Bibliography / Literatur / Bibliographie / Bibliografia / Bibliografía**

1. Kushner I, Rzewnicki DL. The acute phase response: general aspects. *Baillieres Clin Rheumatol* 1994;8:513-30.
2. Dixon JS, Bird HA, Sitton NG, et al. C-reactive protein in the serial assessment of disease activity in rheumatoid arthritis. *Scand J Rheum* 1984;13:39-44.
3. Hind CRK, Pepys MB. The role of serum C-reactive (CRP) measurement in clinical practice. *Int Med* 1984;5:112-51.
4. van Leeuwen M, van Rijswijk MH. Acute phase proteins in monitoring of inflammatory disorders. *Baillieres Clin Rheumatol* 1994;8:531-52.
5. Pearson TA, Mensah GA, Alexander RW, et al. Markers of Inflammation and Cardiovascular Disease: application to clinical and public health practice: A statement for healthcare professionals from the Centers for Disease Control and Prevention and the American Heart Association. *Circulation* 2003;107:499-511.
6. Ridker PM, Cushman M, Stampfer MJ, et al. Plasma concentration of C-Reactive Protein and risk of developing peripheral vascular Disease. *Circulation* 1998;97:425-8.
7. Ridker PM, Glynn RJ, Hennekens CH. C-reactive protein adds to the predictive value of total and HDL cholesterol in determining risk of first myocardial infarction. *Circulation* 1998;97:2007-11.
8. Ridker PM, Rifai N, Rose L, et al. Comparison of C-reactive protein and low-density lipoprotein cholesterol levels in the prediction of first cardiovascular events. *N Engl J Med* 2002;347:1557-65.
9. Clinical and Laboratory Standards Institute (CLSI). Procedures for the Collection of Diagnostic Blood Specimens by Venipuncture; Approved Standard-Fifth Edition. CLSI document H3-A5 (ISBN 1-56238-515-1). CLSI, 940 West Valley Road, Suite 1400, Wayne, PA 19087-1898 USA, 2003.
10. Clinical and Laboratory Standards Institute (CLSI). Tubes and Additives for Venous Blood Specimen Collection; Approved Standard-Fifth Edition. CLSI document H1-A5 (ISBN 1-56238-519-4). CLSI, 940 West Valley Road, Suite 1400, Wayne, PA 19087-1898 USA, 2003.
11. Clinical and Laboratory Standards Institute (CLSI). Procedures for the Handling and Processing of Blood Specimens; Approved Guideline-Third Edition. CLSI document H18-A3 (ISBN 1-56238-555-0). CLSI, 940 West Valley Road, Suite 1400, Wayne, PA 19087-1898 USA, 2004.
12. Kricka LJ. Human anti-animal antibody interference in immunological assays. *ClinChem* 1999;45:942-956.
13. Graph adapted from Ridker PM, Stampfer MJ, Rifai N. Novel risk factors for systemic atherosclerosis: a comparison of C-reactive protein, fibrinogen, homocysteine, lipoprotein(a), and standard cholesterol screening as predictors of peripheral arterial disease. *JAMA* 2001;285:2481-5.
14. Graph adapted from Heeschen C, Hamm C, Bruemmer J, et al. Predictive value of C-reactive protein and troponin T in patients with unstable angina: A comparative analysis. *J Am Coll Cardiol* 2000;35:1535-42.
15. Tracy RP, Lemaitre RN, Psaty BM, et al. Relationship of C-reactive protein to risk of cardiovascular disease in the elderly. Results from the Cardiovascular Health Study and the Rural Health Promotion Project. *Arterioscler Thromb Vasc Biol* 1997;17:1121-7.
16. Macy EM, Hayes TE, Tracy RP. Variability in the measurement of C-reactive protein in healthy subjects: implications for reference intervals and epidemiological applications. *Clin Chem* 1997;43:52-8.
17. Clinical and Laboratory Standards Institute (CLSI). Evaluation of Precision Performance of Quantitative Measurement Methods; Approved Guideline-Second Edition. CLSI document EP5-A2 (ISBN 1-56238-542-9). CLSI, 940 West Valley Road, Suite 1400, Wayne, PA 19087-1898 USA, 2004.
18. Clinical and Laboratory Standards Institute (CLSI). Method Comparison and Bias Estimation Using Patient Samples; Approved Guideline-Second Edition. CLSI document EP9-A2 (ISBN 1-56238-472-4). CLSI, 940 West Valley Road, Suite 1400, Wayne, PA 19087-1898 USA, 2002.
19. Clinical and Laboratory Standards Institute (CLSI). Interference Testing in Clinical Chemistry; Approved Guideline-Second Edition. CLSI document EP7-A2 (ISBN 1-56238-584-4). CLSI, 940 West Valley Road, Suite 1400, Wayne, PA 19087-1898 USA, 2005.
20. Schreiber W, Rausch S, Lammers M. Choice of specimen for immunonephelometric protein assays. *Clin Chim Acta* 2005;355:S407.

**Symbols Key  
 Symbolschlüssel  
 Explication des Symboles  
 Interpretazione simboli  
 Clave de los Símbolos**

|                                                                                                                |                                                                                                                                                                                                                                           |
|----------------------------------------------------------------------------------------------------------------|-------------------------------------------------------------------------------------------------------------------------------------------------------------------------------------------------------------------------------------------|
|                           | Do not reuse / Nicht zur Wiederverwendung / Ne pas réutiliser / Non riutilizzare / No reutilizar                                                                                                                                          |
| <b>EXP</b><br>CCYY-MM-DD  | Use By / Verwendbar bis / Utiliser jusque / Utilizzare entro / Fecha de caducidad                                                                                                                                                         |
| <b>LOT</b>                                                                                                     | Batch Code / Chargenbezeichnung / Code du lot / Codice del lotto / Código de lote                                                                                                                                                         |
| <b>REF</b>                                                                                                     | Catalogue Number / Bestellnummer / Référence du catalogue / Numero di catalogo / Número de catálogo                                                                                                                                       |
|                           | Caution, consult accompanying documents / Achtung, Begleitdokumente beachten / Attention voir notice d'instructions / Attenzione, vedere le istruzioni per l'uso / Atención, ver instrucciones de uso                                     |
|                           | Manufacturer / Hersteller / Fabricant / Fabricante / Fabricante                                                                                                                                                                           |
| <b>EC REP</b>                                                                                                  | Authorized Representative in the European Community / Bevollmächtigter in der Europäischen Gemeinschaft / Mandataire dans la Communauté européenne / Mandatario nella Comunità Europea / Representante autorizado en la Comunidad Europea |
|                           | Contains sufficient for <n> tests / Inhalt ausreichend für <n> Tests / Contenu suffisant pour "n" tests / Contenuto sufficiente per "n" saggi / Contenido suficiente para <n> ensayos                                                     |
| <b>IVD</b>                                                                                                     | In Vitro Diagnostic Medical Device / In-Vitro-Diagnostikum / Dispositif médical de diagnostic in vitro / Dispositivo medico-diagnostico in vitro / Producto sanitario para diagnóstico in vitro                                           |
|                           | Temperature Limitation / Temperaturbegrenzung / Limites de température / Limiti di temperatura / Limite de temperatura                                                                                                                    |
|                           | Consult Instructions for Use / Gebrauchsanweisung beachten / Consulter les instructions d'utilisation / Consultare le istruzioni per l'uso / Consulte las instrucciones de uso                                                            |
|                           | Non-sterile / Nicht steril / Non stérile / Non sterile / No estéril                                                                                                                                                                       |
| <b>CE</b>                                                                                                      | CE Mark / CE Zeichen / Marquage CE / Marchio CE / Marca CE                                                                                                                                                                                |
| <b>CONTENTS</b>                                                                                                | Contents / Inhalt / Contenu / Contenuto / Contenido                                                                                                                                                                                       |
|                           | Reconstitution Volume / Rekonstitutionsvolumen / Volume de reconstitution / Volume di ricostituzione / Volumen de reconstitución                                                                                                          |
| <b>LEVEL</b>                                                                                                   | Level / Konzentration / Niveau / Livello / Nivel                                                                                                                                                                                          |

2006-06\_EFIGS
